# Supplementary material for: Capture of a functionally active methyl-CpG binding domain by an arthropod retrotransposon family
Source: HighWire-hosted journal article supplement (doi:10.1101/gr.243774.118), 2019-06-25
Supplement: Supplemental_Tables_S1-8.xlsx [file Supplemental_Tables_S1-8.xlsx]

## Sheet: S1_List_of_scanned_genomes
Supplemental Table S1: Genomes searched for CopiaMBDs
Species
Homo sapiens
Danio rerio
Callorhinchus milii
Petromyzon marinus
Ciona intestinalis
Oikopleura dioica
Branchiostoma belcheri
Saccoglossus kowalevskii
Ptychodera flava
Strongylocentrotus purpuratus
Acanthaster planci
Drosophila melanogaster
Aedes aegypti
Apis mellifera
Bombyx mori
Tribolium castaneum
Acyrthosiphon pisum
Zootermopsis nevadensis
Daphnia pulex
Parhyale hawaiensis
Lepeophtheirus salmonis
Strigamia maritima
Trigoniulus corallinus
Limulus polyphemus
Tetranychus urticae
Parasteatoda tepidariorum
Nephila clavipes
Stegodyphus mimosarum
Centruroides sculpturatus
Hypsibius dujardini
Ramazzottius varieornatus
Caenorhabditis elegans
Trichinella spiralis
Capitella teleta
Helobdella robusta
Biomphalaria glabrata
Lottia gigantea
Crassostrea gigas
Octopus bimaculoides
Notospermus geniculatus
Phoronis australis
Lingula anatina
Echinoccocus multilocularis
Schistosoma mansoni
Adineta vaga
Nematostella vectensis
Aiptasia spp
Acropora digitifera
Hydra magnipapillata
Thelohanellus kitauei
Trichoplax adhaerens
Pleurobrachia bachei
Mnemiopsis leidyi
Oscarella carmela
Amphimedon queenslandica
Tethya wilhelma
Sycon ciliatum
Leucosolenia complicata

## Sheet: S2_RVT_2_alignment
	Supplemental Table S2: Multi-sequence alignment of the reverse transcriptase domain for Copia and other LTR-retrotransposons
Species	Sequence_ID	Aligned_sequence
Aedes aegypti	AACopia1#LTR/Copia 194-4087 [Aedes aegypti]	--------------------------------------------------------------------------------------------------------------------------------------------------------------------------------MA----------------------DAK----------------------------------------------------------------------------------------------------------------------------------------------------------------------------------------------------…
Aedes aegypti	Copia-119_AA#LTR/Copia 177-4103 [Aedes aegypti]	--------------------------------------------------------------------------------------------------------------------------------------------------------------------------------MG----------------------DAK----------------------------------------------------------------------------------------------------------------------------------------------------------------------------------------------------…
Aedes aegypti	Copia-11_AA#LTR/Copia 109-4122 [Aedes aegypti]	--------------------------------------------------------------------------------------------------------------------------------------------------------------------------------ME----------------------ALN----------------------------------------------------------------------------------------------------------------------------------------------------------------------------------------------------…
Aedes aegypti	Copia-100_AA#LTR/Copia 156-3335 via tfasty with Copia-112_AA, 2 frameshifts. Two internal deletions [Aedes aegypti]	--------------------------------------------------------------------------------------------------------------------------------------------------------------------------------MD----------------------SIS----------------------------------------------------------------------------------------------------------------------------------------------------------------------------------------------------…
Aedes aegypti	Copia-112_AA#LTR/Copia 116-4120 [Aedes aegypti]	--------------------------------------------------------------------------------------------------------------------------------------------------------------------------------MA----------------------DFKG---------------------------------------------------------------------------------------------------------------------------------------------------------------------------------------------------…
Aedes aegypti	Copia-99_AA#LTR/Copia 144-4141 via tfasty with Copia-112_AA, 1 frameshift. [Aedes aegypti]	--------------------------------------------------------------------------------------------------------------------------------------------------------------------------------MA----------------------DPGK---------------------------------------------------------------------------------------------------------------------------------------------------------------------------------------------------…
Aedes aegypti	Copia-107_AA#LTR/Copia 187-4143 via tfasty with Copia-29_CQ, 3 frameshifts. After removal of a hairpin insertion (probably a DNA transposon) at pos 2190-2887 [Aedes aegypti]	--------------------------------------------------------------------------------------------------------------------------------------------------------------------------------MA----------------------DPGR---------------------------------------------------------------------------------------------------------------------------------------------------------------------------------------------------…
Aedes aegypti	Copia-101_AA#LTR/Copia 317-4209 via tfasty with Copia-112_AA, 1 frameshift. [Aedes aegypti]	--------------------------------------------------------------------------------------------------------------------------------------------------------------------------------MS----------------------E------------------------------------------------------------------------------------------------------------------------------------------------------------------------------------------------------…
Aedes aegypti	Copia-133_AA#LTR/Copia 260-3851 via tfasty with Copia-101_AA, 4 frameshifts and 1 stopcodon. Copia-98_AA similar with a large internal deletion. [Aedes aegypti]	--------------------------------------------------------------------------------------------------------------------------------------------------------------------------------MS----------------------E------------------------------------------------------------------------------------------------------------------------------------------------------------------------------------------------------…
Aedes aegypti	Copia-125_AA#LTR/Copia 348-5287 via tfasty with Copia-101_AA, 2 frameshifts and 12 stopcodons. [Aedes aegypti]	--------------------------------------------------------------------------------------------------------------------------------------------------------------------------------MT----------------------E------------------------------------------------------------------------------------------------------------------------------------------------------------------------------------------------------…
Aedes aegypti	Copia-9_AA#LTR/Copia 118-4031 via tfasty with Copia-97_AA, 87.0% SW:4609, 1 frameshift. [Aedes aegypti]	--------------------------------------------------------------------------------------------------------------------------------------------------------------------------------MA----------------------DTK----------------------------------------------------------------------------------------------------------------------------------------------------------------------------------------------------…
Aedes aegypti	Copia-97_AA#LTR/Copia 118-4020 After removal of a c.150 bp Sola-like insertion. [Aedes aegypti]	--------------------------------------------------------------------------------------------------------------------------------------------------------------------------------MA----------------------DAK----------------------------------------------------------------------------------------------------------------------------------------------------------------------------------------------------…
Aedes aegypti	Copia-123_AA#LTR/Copia 120-4043 [Aedes aegypti]	--------------------------------------------------------------------------------------------------------------------------------------------------------------------------------MA----------------------DVK----------------------------------------------------------------------------------------------------------------------------------------------------------------------------------------------------…
Aedes aegypti	Copia-3_AA#LTR/Copia 129-4059 via tfasty with Copia-19_CQ, 81.8% SW:4095, 1 frameshift and 1 stopcodon. [Aedes aegypti]	--------------------------------------------------------------------------------------------------------------------------------------------------------------------------------ME----------------------GNR----------------------------------------------------------------------------------------------------------------------------------------------------------------------------------------------------…
Aedes aegypti	Copia-5_AA#LTR/Copia 97-3990 via tfasty with Copia-135_AA, 82.0% SW:3755, 1 stopcodon. [Aedes aegypti]	--------------------------------------------------------------------------------------------------------------------------------------------------------------------------------MD----------------------ASK----------------------------------------------------------------------------------------------------------------------------------------------------------------------------------------------------…
Aedes aegypti	Copia-135_AA#LTR/Copia 62-4041 [Aedes aegypti]	--------------------------------------------------------------------------------------------------------------------------------------------------------------------------------MD----------------------GGK----------------------------------------------------------------------------------------------------------------------------------------------------------------------------------------------------…
Aedes aegypti	Copia-136_AA#LTR/Copia 98-3981 via tfasty with Copia-135_AA, 1 frameshift. [Aedes aegypti]	--------------------------------------------------------------------------------------------------------------------------------------------------------------------------------ME----------------------GSK----------------------------------------------------------------------------------------------------------------------------------------------------------------------------------------------------…
Aedes aegypti	Copia-96_AA#LTR/Copia 113-4246 [Aedes aegypti]	--------------------------------------------------------------------------------------------------------------------------------------------------------------------------------ME----------------------K------------------------------------------------------------------------------------------------------------------------------------------------------------------------------------------------------…
Aedes aegypti	Copia-102_AA#LTR/Copia 95-4120 [Aedes aegypti]	--------------------------------------------------------------------------------------------------------------------------------------------------------------------------------ME----------------------RT-----------------------------------------------------------------------------------------------------------------------------------------------------------------------------------------------------…
Aedes aegypti	Copia-127_AA#LTR/Copia 30-4045 via tfasty with Copia-96_AA, 1 frameshift. [Aedes aegypti]	--------------------------------------------------------------------------------------------------------------------------------------------------------------------------------ME-----------------------------------------------------------------------------------------------------------------------------------------------------------------------------------------------------------------------------…
Aedes aegypti	Copia-120_AA#LTR/Copia 110-4005 via tfasty with Copia2_AG, 1 frameshift and 1 stopcodon. [Aedes aegypti]	--------------------------------------------------------------------------------------------------------------------------------------------------------------------------------ME----------------------WAR----------------------------------------------------------------------------------------------------------------------------------------------------------------------------------------------------…
Aedes aegypti	Copia-130_AA#LTR/Copia 1666-5041 via tfasty with Copia-23_CQ, 2 frameshifts. Fragment. N-term 50-100 AA missing. [Aedes aegypti]	---------------------------------------------------------------------------------------------------------------------------------------------------------------------------------------------------------------------------------------------------------------------------------------------------------------------------------------------------------------------------------------------------------------…
Xenopus (silurana) tropicalis	Copia1_XT#LTR/Copia 189-4049 [Xenopus (silurana) tropicalis]	--------------------------------------------------------------------------------------------------------------------------------------------------------------------------------MA----------------------ANSTK--------------------------------------------------------------------------------------------------------------------------------------------------------------------------------------------------…
Stegodyphus mimosarum	Smal_Gene.26022::hit_998::g.26022::m.26022 type:complete len:1219 gc:universal hit_998:6787-10443(+)	--------------------------------------------------------------------------------------------------------------------------------------------------------------------------------MA----------------------AMDR---------------------------------------------------------------------------------------------------------------------------------------------------------------------------------------------------…
Nasonia vitripennis	Copia9-NVi#LTR/Copia 121-4558 via tfasty with AACopia1_194-4087, 2 frameshifts and 1 stopcodon. [Nasonia vitripennis]	--------------------------------------------------------------------------------------------------------------------------------------------------------------------------------MA----------------------E------------------------------------------------------------------------------------------------------------------------------------------------------------------------------------------------------…
Drosophila melanogaster	Copia1_DM#LTR/Copia 126-4085 Frogger product similar and fragmented. [Drosophila melanogaster]	--------------------------------------------------------------------------------------------------------------------------------------------------------------------------------MS----------------------VSI----------------------------------------------------------------------------------------------------------------------------------------------------------------------------------------------------…
Drosophila virilis	Copia-1_DVir#LTR/Copia 134-4106 via tfasty with Copia1_DM, 1 frameshift and 5 stopcodons. [Drosophila virilis]	--------------------------------------------------------------------------------------------------------------------------------------------------------------------------------MN----------------------MSH----------------------------------------------------------------------------------------------------------------------------------------------------------------------------------------------------…
Drosophila persimilis	Copia-29_DP#LTR/Copia 126-4065 via tfasty with Copia-1_DVir, 88.7% SW:4937, 1 frameshift and 1 stopcodon. [Drosophila persimilis]	--------------------------------------------------------------------------------------------------------------------------------------------------------------------------------MN----------------------LSN----------------------------------------------------------------------------------------------------------------------------------------------------------------------------------------------------…
Drosophila ananassae	Copia-7_DAn#LTR/Copia 121-4122 [Drosophila ananassae]	--------------------------------------------------------------------------------------------------------------------------------------------------------------------------------MS----------------------VSL----------------------------------------------------------------------------------------------------------------------------------------------------------------------------------------------------…
Drosophila fruit fly genus	Copia2#LTR/Copia 119-4084 Wised via estwise with Copia4_AG.LTR protein [Drosophila fruit fly genus]	--------------------------------------------------------------------------------------------------------------------------------------------------------------------------------MS----------------------SSIN---------------------------------------------------------------------------------------------------------------------------------------------------------------------------------------------------…
Drosophila bipectinata	Copia-1_DBp#LTR/Copia 83-3876 via tfasty with Copia-4_DWil, 79.9% SW:3599, 1 frameshift and 4 stopcodons. [Drosophila bipectinata]	MNKI--------------------------------------------------------------------------------------------------------------------------------------------------------------------------NKMS-----------------------------------------------------------------------------------------------------------------------------------------------------------------------------------------------------------------------------…
Drosophila willistoni	Copia-4_DWil#LTR/Copia 91-3619 via tfasty with Copia2, 3 frameshifts and 2 stopcodons (several deletions). [Drosophila willistoni]	--------------------------------------------------------------------------------------------------------------------------------------------------------------------------------MS-----------------------------------------------------------------------------------------------------------------------------------------------------------------------------------------------------------------------------…
Drosophila simulans	Copia-1_DSim#LTR/Copia 153-4055 via tfasty with Copia-1_DYa, 80.8% SW:3438, 2 frameshifts. [Drosophila simulans]	--------------------------------------------------------------------------------------------------------------------------------------------------------------------------------MS----------------------IT-----------------------------------------------------------------------------------------------------------------------------------------------------------------------------------------------------…
Drosophila ananassae	Copia-6_DAn#LTR/Copia 121-3988 via tfasty with Copia-1_DYa, 79.6% SW:3362, 1 frameshift. [Drosophila ananassae]	--------------------------------------------------------------------------------------------------------------------------------------------------------------------------------MS----------------------VS-----------------------------------------------------------------------------------------------------------------------------------------------------------------------------------------------------…
Drosophila eugracilis	Copia-1_Deu#LTR/Copia 79-3896 via tfasty with Copia-1_DYa, 86.0% SW:4375, 3 frameshifts and 2 stopcodons. [Drosophila eugracilis]	MN------------------------------------------------------------------------------------------------------------------------------------------------------------------------------MS----------------------GHG----------------------------------------------------------------------------------------------------------------------------------------------------------------------------------------------------…
Drosophila yakuba	Copia-1_DYa#LTR/Copia 101-4017 via tfasty with Copia2, 1 frameshift and 1 stopcodon. [Drosophila yakuba]	--------------------------------------------------------------------------------------------------------------------------------------------------------------------------------MS----------------------GQG----------------------------------------------------------------------------------------------------------------------------------------------------------------------------------------------------…
Drosophila pseudoobscura	Copia2_Dpse#LTR/Copia 547-4185 [Drosophila pseudoobscura]	--------------------------------------------------------------------------------------------------------------------------------------------------------------------------------MS----------------------GNMN---------------------------------------------------------------------------------------------------------------------------------------------------------------------------------------------------…
Drosophila ficusphila	Copia-1_DFi#LTR/Copia 72-3772 via tfasty with Copia-1_DY, 88.6% SW:5074, 6 frameshifts. [Drosophila ficusphila]	--------------------------------------------------------------------------------------------------------------------------------------------------------------------------------MS----------------------A------------------------------------------------------------------------------------------------------------------------------------------------------------------------------------------------------…
Drosophila yakuba	Copia-1_DY#LTR/Copia 67-3929 via tfasty with DM1731, 1 frameshift. Copia-2_DTa very similar, with internal deletions. [Drosophila yakuba]	--------------------------------------------------------------------------------------------------------------------------------------------------------------------------------MS----------------------A------------------------------------------------------------------------------------------------------------------------------------------------------------------------------------------------------…
Drosophila bipectinata	Copia-2_DBp#LTR/Copia 66-3674 via tfasty with Copia-1_DY, 88.5% SW:5179, 3 frameshifts. [Drosophila bipectinata]	--------------------------------------------------------------------------------------------------------------------------------------------------------------------------------MS----------------------A------------------------------------------------------------------------------------------------------------------------------------------------------------------------------------------------------…
Drosophila persimilis	Copia-2_DPer#LTR/Copia 93-3965 [Drosophila persimilis]	--------------------------------------------------------------------------------------------------------------------------------------------------------------------------------MS----------------------G------------------------------------------------------------------------------------------------------------------------------------------------------------------------------------------------------…
Drosophila eugracilis	Copia-3_DEu#LTR/Copia 167-4127 via tfasty with Copia-2_DPer, 85.4% SW:4377, 2 frameshifts. [Drosophila eugracilis]	--------------------------------------------------------------------------------------------------------------------------------------------------------------------------------MS----------------------A------------------------------------------------------------------------------------------------------------------------------------------------------------------------------------------------------…
Drosophila fruit fly genus	DM1731#LTR/Copia 95-3942 via tfasty with Copia2, 2 frameshifts. [Drosophila fruit fly genus]	--------------------------------------------------------------------------------------------------------------------------------------------------------------------------------MS----------------------N------------------------------------------------------------------------------------------------------------------------------------------------------------------------------------------------------…
Drosophila willistoni	Copia-3_DWil#LTR/Copia 132-4019 [Drosophila willistoni]	--------------------------------------------------------------------------------------------------------------------------------------------------------------------------------MS----------------------N------------------------------------------------------------------------------------------------------------------------------------------------------------------------------------------------------…
Drosophila willistoni	Copia-2_DWil#LTR/Copia 154-3837 via tfasty with DM1731, 2 frameshifts. (probably has 70 A deletion) [Drosophila willistoni]	--------------------------------------------------------------------------------------------------------------------------------------------------------------------------------MS----------------------A------------------------------------------------------------------------------------------------------------------------------------------------------------------------------------------------------…
Drosophila willistoni	Copia-1_DWil#LTR/Copia 127-3997 via tfasty with Copia-1_DY, 1 frameshift. [Drosophila willistoni]	--------------------------------------------------------------------------------------------------------------------------------------------------------------------------------MS----------------------S------------------------------------------------------------------------------------------------------------------------------------------------------------------------------------------------------…
Drosophila mojavensis	Copia1_Dmoj#LTR/Copia 121-4013 via tfasty with Copia1_DM, 1 frameshift. [Drosophila mojavensis]	--------------------------------------------------------------------------------------------------------------------------------------------------------------------------------MS----------------------S------------------------------------------------------------------------------------------------------------------------------------------------------------------------------------------------------…
Drosophila willistoni	Copia-7_DWil#LTR/Copia 107-3983 via tfasty with Copia1_Dmoj, 87.7% SW:4573, 3 frameshifts. [Drosophila willistoni]	--------------------------------------------------------------------------------------------------------------------------------------------------------------------------------MS----------------------S------------------------------------------------------------------------------------------------------------------------------------------------------------------------------------------------------…
Drosophila grimshawi	Copia-4_DGri#LTR/Copia 166-4110 [Drosophila grimshawi]	--------------------------------------------------------------------------------------------------------------------------------------------------------------------------------MS----------------------A------------------------------------------------------------------------------------------------------------------------------------------------------------------------------------------------------…
Drosophila elegans	Copia-1_DEl#LTR/Copia 83-4095 via tfasty with Copia-6_DWil, 71.7% SW:2585, 3 frameshifts and 1 stopcodon. [Drosophila elegans]	--------------------------------------------------------------------------------------------------------------------------------------------------------------------------------MS----------------------GAF----------------------------------------------------------------------------------------------------------------------------------------------------------------------------------------------------…
Drosophila grimshawi	Copia-1_DGri#LTR/Copia 107-4091 via tfasty with Copia-6_DWil, 72.1% SW:2702, 2 frameshifts. [Drosophila grimshawi]	---------------------------------------------------------------------------------------------------------------------------------------------------------------------------------------------------------------------------------------------------------------------------------------------------------------------------------------------------------------------------------------------------------------…
Drosophila grimshawi	Copia-2_DGri#LTR/Copia 64-4108 via tfasty with Copia-6_DWil, 73.6% SW:2798, 2 frameshifts. [Drosophila grimshawi]	--------------------------------------------------------------------------------------------------------------------------------------------------------------------------------MA----------------------GAF----------------------------------------------------------------------------------------------------------------------------------------------------------------------------------------------------…
Drosophila willistoni	Copia-9_DWil#LTR/Copia 48-4085 via tfasty with Copia-6_DWil, 72.8% SW:2810, 2 frameshifts. [Drosophila willistoni]	MQKL--------------------------------------------------------------------------------------------------------------------------------------------------------------------------CKMA----------------------SAL----------------------------------------------------------------------------------------------------------------------------------------------------------------------------------------------------…
Drosophila ananassae	Copia-8_DAn#LTR/Copia 97-4304 via tfasty with Copia-6_DWil, 68.1% SW:2573, 2 frameshifts and 3 stopcodons. [Drosophila ananassae]	--------------------------------------------------------------------------------------------------------------------------------------------------------------------------------MA----------------------SAF----------------------------------------------------------------------------------------------------------------------------------------------------------------------------------------------------…
Drosophila takahashii	Copia-1_DTa#LTR/Copia 224-4139 via tfasty with Copia-6_DWil, 79.3% SW:3339, 3 frameshifts. [Drosophila takahashii]	--------------------------------------------------------------------------------------------------------------------------------------------------------------------------------MS-------------------------F---------------------------------------------------------------------------------------------------------------------------------------------------------------------------------------------------…
Strigamia maritima	JH431875.g3435.t1	---------------------------------------------------------------------------------------------------------------------------------------------------------------------------------------------------------------------------------------------------------------------------------------------------------------------------------------------------------------------------------------------------------------…
Strigamia maritima	JH431649.g5040.t1	---------------------------------------------------------------------------------------------------------------------------------------------------------------------------------------------------------------------------------------------------------------------------------------------------------------------------------------------------------------------------------------------------------------…
Strigamia maritima	JH429957.g6121.t1	---------------------------------------------------------------------------------------------------------------------------------------------------------------------------------------------------------------------------------------------------------------------------------------------------------------------------------------------------------------------------------------------------------------…
Drosophila willistoni	Copia-6_DWil#LTR/Copia 265-4233 via tfasty with Copia1_DM, 2 stopcodons. [Drosophila willistoni]	--------------------------------------------------------------------------------------------------------------------------------------------------------------------------------MS----------------------VAS----------------------------------------------------------------------------------------------------------------------------------------------------------------------------------------------------…
Centruroides sculpturatus	Scorpion_Gene.995::hit_56::g.995::m.995 type:complete len:1334 gc:universal hit_56:7001-11002(+)	---------------------------------------------------------------------------------------------------------------------------------------------------------------------------------------------------------------------------------------------------------------------------------------------------------------------------------------------------------------------------------------------------------------…
Tribolium castaneum	Tcas_TC002223	--------------------------------------------------------------------------------------------------------------------------------------------------------------------------------MS----------------------GNSS---------------------------------------------------------------------------------------------------------------------------------------------------------------------------------------------------…
Tribolium castaneum	Tcas_TC002224	--------------------------------------------------------------------------------------------------------------------------------------------------------------------------------MS----------------------GNSS---------------------------------------------------------------------------------------------------------------------------------------------------------------------------------------------------…
Stegodyphus mimosarum	Smal_Gene.19631::hit_725::g.19631::m.19631 type:complete len:1541 gc:universal hit_725:4928-9550(+)	---------------------------------------------------------------------------------------------------------------------------------------------------------------------------------------------------------------------------------------------------------------------------------------------------------------------------------------------------------------------------------------------------------------…
Stegodyphus mimosarum	Smal_Gene.25999::hit_997::g.25999::m.25999 type:complete len:1125 gc:universal hit_997:6644-10018(+)	---------------------------------------------------------------------------------------------------------------------------------------------------------------------------------------------------------------------------------------------------------------------------------------------------------------------------------------------------------------------------------------------------------------…
Stegodyphus mimosarum	Smal_Gene.20738::hit_779::g.20738::m.20738 type:complete len:1382 gc:universal hit_779:4426-8571(+)	--------------------------------------------------------------------------------------------------------------------------------------------------------------------------------M---------------------------------------------------------------------------------------------------------------------------------------------------------------------------------------------------FLRLQSLNK-----------CLSC-RW…
Stegodyphus mimosarum	Smal_Gene.28692::hit_1097::g.28692::m.28692 type:complete len:1527 gc:universal hit_1097:3992-8572(+)	--------------------------------------------------------------------------------------------------------------------------------------------------------------------------------MA----------------------NNQYVRRHLDAFTRGRIIXXXXXXXXXXXXXXXXXXXXXXXXXXXXXXXXXXXXXXXXXXXXXXXXXXXXXXXXXXXXXX---------------XXXXXXXXXXXXXXXXXXXXXX-----------XXXXXXXXXXXXXXXXXXXXXXXXXXXXXXXXXXXXXXXXXXXXXXXXXXXXX-----------XXXX-XX…
Strigamia maritima	AFFK01018914.g3092.t1	---------------------------------------------------------------------------------------------------------------------------------------------------------------------------------------------------------------------------------------------------------------------------------------------------------------------------------------------------------------------------------------------------------------…
Strigamia maritima	JH431867.g4857.t1	---------------------------------------------------------------------------------------------------------------------------------------------------------------------------------------------------------------------------------------------------------------------------------------------------------------------------------------------------------------------------------------------------------------…
Strigamia maritima	JH430986.g3561.t1	---------------------------------------------------------------------------------------------------------------------------------------------------------------------------------------------------------------------------------------------------------------------------------------------------------------------------------------------------------------------------------------------------------------…
Strigamia maritima	AFFK01020218.g4550.t1	---------------------------------------------------------------------------------------------------------------------------------------------------------------------------------------------------------------------------------------------------------------------------------------------------------------------------------------------------------------------------------------------------------------…
Centruroides sculpturatus	Scorpion_Gene.875::hit_49::g.875::m.875 type:5prime_partial len:1053 gc:universal hit_49:2-3160(+)	---------------------------------------------------------------------------------------------------------------------------------------------------------------------------------------------------------------------------------------------------------------------------------------------------------------------------------------------------------------------------------------------------------------…
Centruroides sculpturatus	Scorpion_Gene.651::hit_39::g.651::m.651 type:complete len:818 gc:universal hit_39:7111-9564(+)	---------------------------------------------------------------------------------------------------------------------------------------------------------------------------------------------------------------------------------------------------------------------------------------------------------------------------------------------------------------------------------------------------------------…
Drosophila mojavensis	Copia2_Dmoj#LTR/Copia 184-4004 via tfasty with Copia11-NVi, 1 frameshift and 1 stopcodon. [Drosophila mojavensis]	--------------------------------------------------------------------------------------------------------------------------------------------------------------------------------ME-----------------------------------------------------------------------------------------------------------------------------------------------------------------------------------------------------------------------------…
Nasonia vitripennis	Copia16-NVi#LTR/Copia 144-4191 via tfasty with Copia3-NVi, 1 frameshift. [Nasonia vitripennis]	--------------------------------------------------------------------------------------------------------------------------------------------------------------------------------ME----------------------GELT---------------------------------------------------------------------------------------------------------------------------------------------------------------------------------------------------…
Centruroides sculpturatus	Scorpion_Gene.225::hit_12::g.225::m.225 type:3prime_partial len:884 gc:universal hit_12:6881-9529(+)	--------------------------------------------------------------------------------------------------------------------------------------------------------------------------------M------------------------------------------------------------------------------------------------------------------------------------------------------------------------------------------------------------------------------…
Centruroides sculpturatus	Scorpion_Gene.924::hit_52::g.924::m.924 type:complete len:769 gc:universal hit_52:3230-5536(+)	--------------------------------------------------------------------------------------------------------------------------------------------------------------------------------ME----------------------GEPA---------------------------------------------------------------------------------------------------------------------------------------------------------------------------------------------------…
Trichinella spiralis	Tspi_EFV55218	--------------------------------------------------------------------------------------------------------------------------------------------------------------------------------MA----------------------PPAG---------------------------------------------------------------------------------------------------------------------------------------------------------------------------------------------------…
Trichinella spiralis	Tspi_EFV48939	--------------------------------------------------------------------------------------------------------------------------------------------------------------------------------MS-----------------------------------------------------------------------------------------------------------------------------------------------------------------------------------------------------------------------------…
Trichinella spiralis	Tspi_EFV49847	--------------------------------------------------------------------------------------------------------------------------------------------------------------------------------MA----------------------PPAG---------------------------------------------------------------------------------------------------------------------------------------------------------------------------------------------------…
Xenopus (silurana) tropicalis	Copia3_XT#LTR/Copia 4-4101 via tfasty with SHACOP15_MT, 1 stopcodon. [Xenopus (silurana) tropicalis]	--------------------------------------------------------------------------------------------------------------------------------------------------------------------------------MS----------------------PSPVFPDQDPDYAFAM---------------------------------------------------------------------------------------------------------------------------------------------------------------------------------------…
Hyaloperonospora arabidopsidis	Copia-1_HAE#LTR/Copia 5-4247 via tfasty with Copia3_XT, 84.2% SW:4728, 2 frameshifts and 1 stopcodon. [Hyaloperonospora arabidopsidis]	--------------------------------------------------------------------------------------------------------------------------------------------------------------------------------MS----------------------PSSADSALDTDFAFNI---------------------------------------------------------------------------------------------------------------------------------------------------------------------------------------…
Strigamia maritima	JH430030.g1847.t1	---------------------------------------------------------------------------------------------------------------------------------------------------------------------------------------------------------------------------------------------------------------------------------------------------------------------------------------------------------------------------------------------------------------…
Strigamia maritima	JH432161.g4785.t1	--------------------------------------------------------------------------------------------------------------------------------------------------------------------------------MD-----------------------------------------------------------------------------------------------------------------------------------------------------------------------------------------------------------------------------…
Strigamia maritima	JH429844.g4156.t1	---------------------------------------------------------------------------------------------------------------------------------------------------------------------------------------------------------------------------------------------------------------------------------------------------------------------------------------------------------------------------------------------------------------…
Strigamia maritima	JH429938.g3080.t1	---------------------------------------------------------------------------------------------------------------------------------------------------------------------------------------------------------------------------------------------------------------------------------------------------------------------------------------------------------------------------------------------------------------…
Strigamia maritima	JH431717.g5019.t1	---------------------------------------------------------------------------------------------------------------------------------------------------------------------------------------------------------------------------------------------------------------------------------------------------------------------------------------------------------------------------------------------------------------…
Aiptasia spp	Aipt_AIPGENE26813	--------------------------------------------------------------------------------------------------------------------------------------------------------------------------------MA----------------------TDSK---------------------------------------------------------------------------------------------------------------------------------------------------------------------------------------------------…
Acropora digitifera	Adig_384v118663	---------------------------------------------------------------------------------------------------------------------------------------------------------------------------------------------------------------------------------------------------------------------------------------------------------------------------------------------------------------------------------------------------------------…
Acropora digitifera	Adig_852v119002	--------------------------------------------------------------------------------------------------------------------------------------------------------------------------------MA----------------------TDSK---------------------------------------------------------------------------------------------------------------------------------------------------------------------------------------------------…
Tethya wilhelma	Twilhelma_g17167.t1	--------------------------------------------------------------------------------------------------------------------------------------------------------------------------------MA----------------------TELK---------------------------------------------------------------------------------------------------------------------------------------------------------------------------------------------------…
Tethya wilhelma	Twilhelma_g768.t1	--------------------------------------------------------------------------------------------------------------------------------------------------------------------------------MA----------------------TGSNTS-------------------------------------------------------------------------------------------------------------------------------------------------------------------------------------------------…
Tethya wilhelma	Twilhelma_g5958.t1	--------------------------------------------------------------------------------------------------------------------------------------------------------------------------------MA----------------------DIKT---------------------------------------------------------------------------------------------------------------------------------------------------------------------------------------------------…
Parhyale hawaiensis	Phaw_30_tra_m.001808	--------------------------------------------------------------------------------------------------------------------------------------------------------------------------------MD----------------------GGKI---------------------------------------------------------------------------------------------------------------------------------------------------------------------------------------------------…
Parhyale hawaiensis	Phaw_30_tra_m.022016	--------------------------------------------------------------------------------------------------------------------------------------------------------------------------------MD----------------------SSKM---------------------------------------------------------------------------------------------------------------------------------------------------------------------------------------------------…
Tethya wilhelma	Twilhelma_g695.t1	---------------------------------------------------------------------------------------------------------------------------------------------------------------------------------------------------------------------------------------------------------------------------------------------------------------------------------------------------------------------------------------------------------------…
Tethya wilhelma	Twilhelma_g5646.t1	MITMENVEHLLGATSEIGECDLDMLDMM------LYVKDSYSIS---HVAYHEMAQICKQMPRQ---------YKIKERIKEL----NEQWNITPL----PNSIEGVQQYLE--------------------ERL------------------------RVRVEHLMKVSTGESEFMK----------------------TKKL---------------------------------------------------------------------------------------------------------------------------------------------------------------------------------------------------…
Tethya wilhelma	Twilhelma_g8087.t1	--------------------------------------------------------------------------------------------------------------------------------------------------------------------------------ME----------------------LEKG---------------------------------------------------------------------------------------------------------------------------------------------------------------------------------------------------…
Tethya wilhelma	Twilhelma_g16404.t1	---------------------------------------------------------------------------------------------------------------------------------------------------------------------------------------------------------------------------------------------------------------------------------------------------------------------------------------------------------------------------------------------------------------…
Tethya wilhelma	Twilhelma_g1343.t1	--------------------------------------------------------------------------------------------------------------------------------------------------------------------------------ME----------------------LEKG---------------------------------------------------------------------------------------------------------------------------------------------------------------------------------------------------…
Tethya wilhelma	Twilhelma_g2206.t1	---------------------------------------------------------------------------------------------------------------------------------------------------------------------------------------------------------------------------------------------------------------------------------------------------------------------------------------------------------------------------------------------------------------…
Tethya wilhelma	Twilhelma_g5584.t1	--------------------------------------------------------------------------------------------------------------------------------------------------------------------------------ME----------------------EK-----------------------------------------------------------------------------------------------------------------------------------------------------------------------------------------------------…
Tethya wilhelma	Twilhelma_g24654.t1	---------------------------------------------------------------------------------------------------------------------------------------------------------------------------------------------------------------------------------------------------------------------------------------------------------------------------------------------------------------------------------------------------------------…
Drosophila ananassae	Copia-4_DAn#LTR/Copia 56-4060 via tfasty with Copia2_Dmoj, 69.8% SW:1983, 2 frameshifts and 2 stopcodons. [Drosophila ananassae]	--------------------------------------------------------------------------------------------------------------------------------------------------------------------------------MD----------------------LAK----------------------------------------------------------------------------------------------------------------------------------------------------------------------------------------------------…
Centruroides sculpturatus	Scorpion_Gene.449::hit_24::g.449::m.449 type:complete len:646 gc:universal hit_24:7210-9147(+)	---------------------------------------------------------------------------------------------------------------------------------------------------------------------------------------------------------------------------------------------------------------------------------------------------------------------------------------------------------------------------------------------------------------…
Stegodyphus mimosarum	Smal_Gene.34122::hit_1311::g.34122::m.34122 type:complete len:1323 gc:universal hit_1311:6865-10833(+)	--------------------------------------------------------------------------------------------------------------------------------------------------------------------------------ME----------------------VGKL---------------------------------------------------------------------------------------------------------------------------------------------------------------------------------------------------…
Selaginella moellendorffii	Copia-8_SMo#LTR/Copia 36-4388 68.3% sim to Copia-7_SMo, SW:2640, [Selaginella moellendorffii]	--------------------------------------------------------------------------------------------------------------------------------------------------------------------------------MG----------------------SVRD---------------------------------------------------------------------------------------------------------------------------------------------------------------------------------------------------…
Daphnia pulex	Copia-6_DPu#LTR/Copia 59-4362 via tfasty with Copia-4_DPu, 2 frameshifts and 2 stopcodons. [Daphnia pulex]	--------------------------------------------------------------------------------------------------------------------------------------------------------------------------------MA----------------------TRQ----------------------------------------------------------------------------------------------------------------------------------------------------------------------------------------------------…
Daphnia pulex	Copia-30_DPu#LTR/Copia 25-4104 [Daphnia pulex]	--------------------------------------------------------------------------------------------------------------------------------------------------------------------------------MS----------------------AIA----------------------------------------------------------------------------------------------------------------------------------------------------------------------------------------------------…
Strigamia maritima	TRINITY_DN9207_c8_g1	---------------------------------------------------------------------------------------------------------------------------------------------------------------------------------------------------------------------------------------------------------------------------------------------------------------------------------------------------------------------------------------------------------------…
Strigamia maritima	SMAR006219|m.320 SMAR006219|g.320 type:complete len:130 gc:universal SMAR006219:2169-2558(+)	---------------------------------------------------------------------------------------------------------------------------------------------------------------------------------------------------------------------------------------------------------------------------------------------------------------------------------------------------------------------------------------------------------------…
Strigamia maritima	SMAR012441|m.160 SMAR012441|g.160 type:5prime_partial len:404 gc:universal SMAR012441:1-1212(+)	---------------------------------------------------------------------------------------------------------------------------------------------------------------------------------------------------------------------------------------------------------------------------------------------------------------------------------------------------------------------------------------------------------------…
Strigamia maritima	JH432140.g4385.t1	---------------------------------------------------------------------------------------------------------------------------------------------------------------------------------------------------------------------------------------------------------------------------------------------------------------------------------------------------------------------------------------------------------------…
Strigamia maritima	SMAR000430|m.906 SMAR000430|g.906 type:complete len:514 gc:universal SMAR000430:2233-3774(+)	---------------------------------------------------------------------------------------------------------------------------------------------------------------------------------------------------------------------------------------------------------------------------------------------------------------------------------------------------------------------------------------------------------------…
Strigamia maritima	AFFK01013844.g1363.t1	---------------------------------------------------------------------------------------------------------------------------------------------------------------------------------------------------------------------------------------------------------------------------------------------------------------------------------------------------------------------------------------------------------------…
Strigamia maritima	AFFK01002051.g436.t1	---------------------------------------------------------------------------------------------------------------------------------------------------------------------------------------------------------------------------------------------------------------------------------------------------------------------------------------------------------------------------------------------------------------…
Strigamia maritima	SMAR007256|m.615 SMAR007256|g.615 type:complete len:112 gc:universal SMAR007256:7622-7957(+)	---------------------------------------------------------------------------------------------------------------------------------------------------------------------------------------------------------------------------------------------------------------------------------------------------------------------------------------------------------------------------------------------------------------…
Strigamia maritima	SMAR001729|m.733 SMAR001729|g.733 type:complete len:325 gc:universal SMAR001729:7774-8748(+)	---------------------------------------------------------------------------------------------------------------------------------------------------------------------------------------------------------------------------------------------------------------------------------------------------------------------------------------------------------------------------------------------------------------…
Strigamia maritima	AFFK01016163.g2032.t1	---------------------------------------------------------------------------------------------------------------------------------------------------------------------------------------------------------------------------------------------------------------------------------------------------------------------------------------------------------------------------------------------------------------…
Strigamia maritima	SMAR012386|m.821 SMAR012386|g.821 type:complete len:312 gc:universal SMAR012386:180-1115(+)	---------------------------------------------------------------------------------------------------------------------------------------------------------------------------------------------------------------------------------------------------------------------------------------------------------------------------------------------------------------------------------------------------------------…
Strigamia maritima	JH432131.g1738.t1	---------------------------------------------------------------------------------------------------------------------------------------------------------------------------------------------------------------------------------------------------------------------------------------------------------------------------------------------------------------------------------------------------------------…
Strigamia maritima	SMAR000499|m.376 SMAR000499|g.376 type:complete len:337 gc:universal SMAR000499:7000-8010(+)	---------------------------------------------------------------------------------------------------------------------------------------------------------------------------------------------------------------------------------------------------------------------------------------------------------------------------------------------------------------------------------------------------------------…
Strigamia maritima	JH430073.g3410.t1	---------------------------------------------------------------------------------------------------------------------------------------------------------------------------------------------------------------------------------------------------------------------------------------------------------------------------------------------------------------------------------------------------------------…
Strigamia maritima	JH429929.g2877.t1	---------------------------------------------------------------------------------------------------------------------------------------------------------------------------------------------------------------------------------------------------------------------------------------------------------------------------------------------------------------------------------------------------------------…
Strigamia maritima	SMAR000164|m.133 SMAR000164|g.133 type:complete len:157 gc:universal SMAR000164:10074-10544(+)	---------------------------------------------------------------------------------------------------------------------------------------------------------------------------------------------------------------------------------------------------------------------------------------------------------------------------------------------------------------------------------------------------------------…
Strigamia maritima	SMAR000290|m.275 SMAR000290|g.275 type:complete len:356 gc:universal SMAR000290:9115-10182(+)	---------------------------------------------------------------------------------------------------------------------------------------------------------------------------------------------------------------------------------------------------------------------------------------------------------------------------------------------------------------------------------------------------------------…
Strigamia maritima	SMAR011749|m.86 SMAR011749|g.86 type:complete len:157 gc:universal SMAR011749:8810-9280(+)	---------------------------------------------------------------------------------------------------------------------------------------------------------------------------------------------------------------------------------------------------------------------------------------------------------------------------------------------------------------------------------------------------------------…
Strigamia maritima	JH429810.g3596.t1	---------------------------------------------------------------------------------------------------------------------------------------------------------------------------------------------------------------------------------------------------------------------------------------------------------------------------------------------------------------------------------------------------------------…
Strigamia maritima	SMAR012441|m.161 SMAR012441|g.161 type:complete len:203 gc:universal SMAR012441:1227-1835(+)	---------------------------------------------------------------------------------------------------------------------------------------------------------------------------------------------------------------------------------------------------------------------------------------------------------------------------------------------------------------------------------------------------------------…
Strigamia maritima	SMAR012386|m.820 SMAR012386|g.820 type:complete len:316 gc:universal SMAR012386:3326-4273(+)	---------------------------------------------------------------------------------------------------------------------------------------------------------------------------------------------------------------------------------------------------------------------------------------------------------------------------------------------------------------------------------------------------------------…
Strigamia maritima	SMAR006219|m.319 SMAR006219|g.319 type:complete len:146 gc:universal SMAR006219:2829-3266(+)	---------------------------------------------------------------------------------------------------------------------------------------------------------------------------------------------------------------------------------------------------------------------------------------------------------------------------------------------------------------------------------------------------------------…
Strigamia maritima	SMAR000499|m.377 SMAR000499|g.377 type:complete len:204 gc:universal SMAR000499:8353-8964(+)	---------------------------------------------------------------------------------------------------------------------------------------------------------------------------------------------------------------------------------------------------------------------------------------------------------------------------------------------------------------------------------------------------------------…
Strigamia maritima	SMAR001300|m.60 SMAR001300|g.60 type:complete len:248 gc:universal SMAR001300:15714-16457(+)	---------------------------------------------------------------------------------------------------------------------------------------------------------------------------------------------------------------------------------------------------------------------------------------------------------------------------------------------------------------------------------------------------------------…
Strigamia maritima	SMAR000031|m.655 SMAR000031|g.655 type:5prime_partial len:244 gc:universal SMAR000031:3-734(+)	---------------------------------------------------------------------------------------------------------------------------------------------------------------------------------------------------------------------------------------------------------------------------------------------------------------------------------------------------------------------------------------------------------------…
Strigamia maritima	SMAR001027|m.69 SMAR001027|g.69 type:complete len:382 gc:universal SMAR001027:9735-10880(+)	---------------------------------------------------------------------------------------------------------------------------------------------------------------------------------------------------------------------------------------------------------------------------------------------------------------------------------------------------------------------------------------------------------------…
Strigamia maritima	SMAR001621|m.664 SMAR001621|g.664 type:5prime_partial len:305 gc:universal SMAR001621:3-917(+)	---------------------------------------------------------------------------------------------------------------------------------------------------------------------------------------------------------------------------------------------------------------------------------------------------------------------------------------------------------------------------------------------------------------…
Strigamia maritima	SMAR009583|m.767 SMAR009583|g.767 type:complete len:383 gc:universal SMAR009583:4865-6013(+)	---------------------------------------------------------------------------------------------------------------------------------------------------------------------------------------------------------------------------------------------------------------------------------------------------------------------------------------------------------------------------------------------------------------…
Strigamia maritima	SMAR006200|m.685 SMAR006200|g.685 type:complete len:130 gc:universal SMAR006200:7931-8320(+)	---------------------------------------------------------------------------------------------------------------------------------------------------------------------------------------------------------------------------------------------------------------------------------------------------------------------------------------------------------------------------------------------------------------…
Strigamia maritima	SMAR012315|m.723 SMAR012315|g.723 type:complete len:383 gc:universal SMAR012315:5753-6901(+)	---------------------------------------------------------------------------------------------------------------------------------------------------------------------------------------------------------------------------------------------------------------------------------------------------------------------------------------------------------------------------------------------------------------…
Strigamia maritima	SMAR007715|m.143 SMAR007715|g.143 type:complete len:282 gc:universal SMAR007715:8424-9269(+)	---------------------------------------------------------------------------------------------------------------------------------------------------------------------------------------------------------------------------------------------------------------------------------------------------------------------------------------------------------------------------------------------------------------…
Strigamia maritima	SMAR003832|m.223 SMAR003832|g.223 type:complete len:282 gc:universal SMAR003832:8696-9541(+)	---------------------------------------------------------------------------------------------------------------------------------------------------------------------------------------------------------------------------------------------------------------------------------------------------------------------------------------------------------------------------------------------------------------…
Strigamia maritima	SMAR001352|m.763 SMAR001352|g.763 type:complete len:335 gc:universal SMAR001352:2838-3842(+)	---------------------------------------------------------------------------------------------------------------------------------------------------------------------------------------------------------------------------------------------------------------------------------------------------------------------------------------------------------------------------------------------------------------…
Strigamia maritima	SMAR003891|m.707 SMAR003891|g.707 type:complete len:179 gc:universal SMAR003891:8532-9068(+)	---------------------------------------------------------------------------------------------------------------------------------------------------------------------------------------------------------------------------------------------------------------------------------------------------------------------------------------------------------------------------------------------------------------…
Strigamia maritima	SMAR000233|m.715 SMAR000233|g.715 type:complete len:175 gc:universal SMAR000233:3145-3669(+)	---------------------------------------------------------------------------------------------------------------------------------------------------------------------------------------------------------------------------------------------------------------------------------------------------------------------------------------------------------------------------------------------------------------…
Strigamia maritima	SMAR000682|m.794 SMAR000682|g.794 type:complete len:383 gc:universal SMAR000682:3851-4999(+)	---------------------------------------------------------------------------------------------------------------------------------------------------------------------------------------------------------------------------------------------------------------------------------------------------------------------------------------------------------------------------------------------------------------…
Strigamia maritima	SMAR001523|m.247 SMAR001523|g.247 type:5prime_partial len:362 gc:universal SMAR001523:2-1087(+)	---------------------------------------------------------------------------------------------------------------------------------------------------------------------------------------------------------------------------------------------------------------------------------------------------------------------------------------------------------------------------------------------------------------…
Strigamia maritima	SMAR000541|m.789 SMAR000541|g.789 type:complete len:291 gc:universal SMAR000541:8055-8927(+)	---------------------------------------------------------------------------------------------------------------------------------------------------------------------------------------------------------------------------------------------------------------------------------------------------------------------------------------------------------------------------------------------------------------…
Strigamia maritima	SMAR000031|m.663 SMAR000031|g.663 type:complete len:102 gc:universal SMAR000031:7665-7970(+)	---------------------------------------------------------------------------------------------------------------------------------------------------------------------------------------------------------------------------------------------------------------------------------------------------------------------------------------------------------------------------------------------------------------…
Strigamia maritima	SMAR004627|m.545 SMAR004627|g.545 type:complete len:189 gc:universal SMAR004627:2243-2809(+)	---------------------------------------------------------------------------------------------------------------------------------------------------------------------------------------------------------------------------------------------------------------------------------------------------------------------------------------------------------------------------------------------------------------…
Strigamia maritima	SMAR014367|m.263 SMAR014367|g.263 type:complete len:200 gc:universal SMAR014367:9803-10402(+)	---------------------------------------------------------------------------------------------------------------------------------------------------------------------------------------------------------------------------------------------------------------------------------------------------------------------------------------------------------------------------------------------------------------…
Strigamia maritima	SMAR001625|m.500 SMAR001625|g.500 type:complete len:298 gc:universal SMAR001625:3019-3912(+)	---------------------------------------------------------------------------------------------------------------------------------------------------------------------------------------------------------------------------------------------------------------------------------------------------------------------------------------------------------------------------------------------------------------…
Strigamia maritima	SMAR001164|m.47 SMAR001164|g.47 type:complete len:227 gc:universal SMAR001164:13535-14215(+)	---------------------------------------------------------------------------------------------------------------------------------------------------------------------------------------------------------------------------------------------------------------------------------------------------------------------------------------------------------------------------------------------------------------…
Strigamia maritima	SMAR001827|m.201 SMAR001827|g.201 type:complete len:384 gc:universal SMAR001827:7401-8552(+)	---------------------------------------------------------------------------------------------------------------------------------------------------------------------------------------------------------------------------------------------------------------------------------------------------------------------------------------------------------------------------------------------------------------…
Strigamia maritima	SMAR000419|m.800 SMAR000419|g.800 type:complete len:317 gc:universal SMAR000419:2021-2971(+)	---------------------------------------------------------------------------------------------------------------------------------------------------------------------------------------------------------------------------------------------------------------------------------------------------------------------------------------------------------------------------------------------------------------…
Strigamia maritima	AFFK01015661.g2107.t1	---------------------------------------------------------------------------------------------------------------------------------------------------------------------------------------------------------------------------------------------------------------------------------------------------------------------------------------------------------------------------------------------------------------…
Strigamia maritima	SMAR010420|m.531 SMAR010420|g.531 type:complete len:315 gc:universal SMAR010420:8173-9117(+)	---------------------------------------------------------------------------------------------------------------------------------------------------------------------------------------------------------------------------------------------------------------------------------------------------------------------------------------------------------------------------------------------------------------…
Strigamia maritima	SMAR000344|m.570 SMAR000344|g.570 type:complete len:384 gc:universal SMAR000344:4092-5243(+)	---------------------------------------------------------------------------------------------------------------------------------------------------------------------------------------------------------------------------------------------------------------------------------------------------------------------------------------------------------------------------------------------------------------…
Strigamia maritima	JH429949.g2592.t1	---------------------------------------------------------------------------------------------------------------------------------------------------------------------------------------------------------------------------------------------------------------------------------------------------------------------------------------------------------------------------------------------------------------…
Strigamia maritima	JH429916.g1521.t1	---------------------------------------------------------------------------------------------------------------------------------------------------------------------------------------------------------------------------------------------------------------------------------------------------------------------------------------------------------------------------------------------------------------…
Strigamia maritima	JH431264.g6744.t1	---------------------------------------------------------------------------------------------------------------------------------------------------------------------------------------------------------------------------------------------------------------------------------------------------------------------------------------------------------------------------------------------------------------…
Strigamia maritima	AFFK01017179.g160.t1	---------------------------------------------------------------------------------------------------------------------------------------------------------------------------------------------------------------------------------------------------------------------------------------------------------------------------------------------------------------------------------------------------------------…
Strigamia maritima	AFFK01015011.g1524.t1	---------------------------------------------------------------------------------------------------------------------------------------------------------------------------------------------------------------------------------------------------------------------------------------------------------------------------------------------------------------------------------------------------------------…
Strigamia maritima	SMAR010420|m.533 SMAR010420|g.533 type:complete len:296 gc:universal SMAR010420:6880-7767(+)	---------------------------------------------------------------------------------------------------------------------------------------------------------------------------------------------------------------------------------------------------------------------------------------------------------------------------------------------------------------------------------------------------------------…
Strigamia maritima	SMAR001673|m.827 SMAR001673|g.827 type:complete len:524 gc:universal SMAR001673:3588-5159(+)	---------------------------------------------------------------------------------------------------------------------------------------------------------------------------------------------------------------------------------------------------------------------------------------------------------------------------------------------------------------------------------------------------------------…
Strigamia maritima	AFFK01002508.g506.t1	---------------------------------------------------------------------------------------------------------------------------------------------------------------------------------------------------------------------------------------------------------------------------------------------------------------------------------------------------------------------------------------------------------------…
Strigamia maritima	JH431522.g1997.t1	---------------------------------------------------------------------------------------------------------------------------------------------------------------------------------------------------------------------------------------------------------------------------------------------------------------------------------------------------------------------------------------------------------------…
Strigamia maritima	AFFK01019209.g3136.t1	---------------------------------------------------------------------------------------------------------------------------------------------------------------------------------------------------------------------------------------------------------------------------------------------------------------------------------------------------------------------------------------------------------------…
Strigamia maritima	SMAR000325|m.109 SMAR000325|g.109 type:complete len:161 gc:universal SMAR000325:16009-16491(+)	---------------------------------------------------------------------------------------------------------------------------------------------------------------------------------------------------------------------------------------------------------------------------------------------------------------------------------------------------------------------------------------------------------------…
Strigamia maritima	SMAR011853|m.565 SMAR011853|g.565 type:complete len:412 gc:universal SMAR011853:495-1730(+)	---------------------------------------------------------------------------------------------------------------------------------------------------------------------------------------------------------------------------------------------------------------------------------------------------------------------------------------------------------------------------------------------------------------…
Strigamia maritima	SMAR005258|m.596 SMAR005258|g.596 type:complete len:350 gc:universal SMAR005258:3627-4676(+)	---------------------------------------------------------------------------------------------------------------------------------------------------------------------------------------------------------------------------------------------------------------------------------------------------------------------------------------------------------------------------------------------------------------…
Strigamia maritima	JH431407.g5401.t1	---------------------------------------------------------------------------------------------------------------------------------------------------------------------------------------------------------------------------------------------------------------------------------------------------------------------------------------------------------------------------------------------------------------…
Strigamia maritima	JH432111.g2290.t1	---------------------------------------------------------------------------------------------------------------------------------------------------------------------------------------------------------------------------------------------------------------------------------------------------------------------------------------------------------------------------------------------------------------…
Strigamia maritima	AFFK01020680.g2859.t1	---------------------------------------------------------------------------------------------------------------------------------------------------------------------------------------------------------------------------------------------------------------------------------------------------------------------------------------------------------------------------------------------------------------…
Strigamia maritima	JH430572.g3256.t1	---------------------------------------------------------------------------------------------------------------------------------------------------------------------------------------------------------------------------------------------------------------------------------------------------------------------------------------------------------------------------------------------------------------…
Strigamia maritima	JH429859.g3537.t1	---------------------------------------------------------------------------------------------------------------------------------------------------------------------------------------------------------------------------------------------------------------------------------------------------------------------------------------------------------------------------------------------------------------…
Strigamia maritima	JH432216.g2573.t1	---------------------------------------------------------------------------------------------------------------------------------------------------------------------------------------------------------------------------------------------------------------------------------------------------------------------------------------------------------------------------------------------------------------…
Strigamia maritima	AFFK01019446.g2426.t1	---------------------------------------------------------------------------------------------------------------------------------------------------------------------------------------------------------------------------------------------------------------------------------------------------------------------------------------------------------------------------------------------------------------…
Strigamia maritima	AFFK01015194.g952.t1	---------------------------------------------------------------------------------------------------------------------------------------------------------------------------------------------------------------------------------------------------------------------------------------------------------------------------------------------------------------------------------------------------------------…
Strigamia maritima	AFFK01015529.g1124.t1	---------------------------------------------------------------------------------------------------------------------------------------------------------------------------------------------------------------------------------------------------------------------------------------------------------------------------------------------------------------------------------------------------------------…
Strigamia maritima	AFFK01014672.g2672.t1	---------------------------------------------------------------------------------------------------------------------------------------------------------------------------------------------------------------------------------------------------------------------------------------------------------------------------------------------------------------------------------------------------------------…
Strigamia maritima	JH430424.g1975.t1	---------------------------------------------------------------------------------------------------------------------------------------------------------------------------------------------------------------------------------------------------------------------------------------------------------------------------------------------------------------------------------------------------------------…
Strigamia maritima	JH430361.g5344.t1	---------------------------------------------------------------------------------------------------------------------------------------------------------------------------------------------------------------------------------------------------------------------------------------------------------------------------------------------------------------------------------------------------------------…
Strigamia maritima	JH431564.g4209.t1	---------------------------------------------------------------------------------------------------------------------------------------------------------------------------------------------------------------------------------------------------------------------------------------------------------------------------------------------------------------------------------------------------------------…
Strigamia maritima	JH430406.g3900.t1	---------------------------------------------------------------------------------------------------------------------------------------------------------------------------------------------------------------------------------------------------------------------------------------------------------------------------------------------------------------------------------------------------------------…
Strigamia maritima	JH430666.g2727.t1	---------------------------------------------------------------------------------------------------------------------------------------------------------------------------------------------------------------------------------------------------------------------------------------------------------------------------------------------------------------------------------------------------------------…
Strigamia maritima	JH432187.g3391.t1	---------------------------------------------------------------------------------------------------------------------------------------------------------------------------------------------------------------------------------------------------------------------------------------------------------------------------------------------------------------------------------------------------------------…
Strigamia maritima	JH431358.g3870.t1	---------------------------------------------------------------------------------------------------------------------------------------------------------------------------------------------------------------------------------------------------------------------------------------------------------------------------------------------------------------------------------------------------------------…
Strigamia maritima	JH431698.g4106.t1	---------------------------------------------------------------------------------------------------------------------------------------------------------------------------------------------------------------------------------------------------------------------------------------------------------------------------------------------------------------------------------------------------------------…
Strigamia maritima	JH430465.g3843.t1	---------------------------------------------------------------------------------------------------------------------------------------------------------------------------------------------------------------------------------------------------------------------------------------------------------------------------------------------------------------------------------------------------------------…
Strigamia maritima	JH429756.g4159.t1	---------------------------------------------------------------------------------------------------------------------------------------------------------------------------------------------------------------------------------------------------------------------------------------------------------------------------------------------------------------------------------------------------------------…
Strigamia maritima	JH431529.g5336.t1	---------------------------------------------------------------------------------------------------------------------------------------------------------------------------------------------------------------------------------------------------------------------------------------------------------------------------------------------------------------------------------------------------------------…
Strigamia maritima	JH431971.g7274.t1	---------------------------------------------------------------------------------------------------------------------------------------------------------------------------------------------------------------------------------------------------------------------------------------------------------------------------------------------------------------------------------------------------------------…
Strigamia maritima	AFFK01023719.g2992.t1	---------------------------------------------------------------------------------------------------------------------------------------------------------------------------------------------------------------------------------------------------------------------------------------------------------------------------------------------------------------------------------------------------------------…
Strigamia maritima	JH431120.g3277.t1	---------------------------------------------------------------------------------------------------------------------------------------------------------------------------------------------------------------------------------------------------------------------------------------------------------------------------------------------------------------------------------------------------------------…
Strigamia maritima	JH430650.g2619.t1	---------------------------------------------------------------------------------------------------------------------------------------------------------------------------------------------------------------------------------------------------------------------------------------------------------------------------------------------------------------------------------------------------------------…
Strigamia maritima	JH430184.g2656.t1	---------------------------------------------------------------------------------------------------------------------------------------------------------------------------------------------------------------------------------------------------------------------------------------------------------------------------------------------------------------------------------------------------------------…
Strigamia maritima	JH431676.g3580.t1	---------------------------------------------------------------------------------------------------------------------------------------------------------------------------------------------------------------------------------------------------------------------------------------------------------------------------------------------------------------------------------------------------------------…
Strigamia maritima	AFFK01018816.g2816.t1	---------------------------------------------------------------------------------------------------------------------------------------------------------------------------------------------------------------------------------------------------------------------------------------------------------------------------------------------------------------------------------------------------------------…
Strigamia maritima	JH431222.g3500.t1	---------------------------------------------------------------------------------------------------------------------------------------------------------------------------------------------------------------------------------------------------------------------------------------------------------------------------------------------------------------------------------------------------------------…
Strigamia maritima	AFFK01018902.g1717.t1	---------------------------------------------------------------------------------------------------------------------------------------------------------------------------------------------------------------------------------------------------------------------------------------------------------------------------------------------------------------------------------------------------------------…
Strigamia maritima	AFFK01000830.g260.t1	---------------------------------------------------------------------------------------------------------------------------------------------------------------------------------------------------------------------------------------------------------------------------------------------------------------------------------------------------------------------------------------------------------------…
Strigamia maritima	AFFK01005648.g390.t1	---------------------------------------------------------------------------------------------------------------------------------------------------------------------------------------------------------------------------------------------------------------------------------------------------------------------------------------------------------------------------------------------------------------…
Strigamia maritima	JH430641.g2983.t1	---------------------------------------------------------------------------------------------------------------------------------------------------------------------------------------------------------------------------------------------------------------------------------------------------------------------------------------------------------------------------------------------------------------…
Strigamia maritima	AFFK01014949.g4827.t1	---------------------------------------------------------------------------------------------------------------------------------------------------------------------------------------------------------------------------------------------------------------------------------------------------------------------------------------------------------------------------------------------------------------…
Strigamia maritima	JH429675.g2140.t1	---------------------------------------------------------------------------------------------------------------------------------------------------------------------------------------------------------------------------------------------------------------------------------------------------------------------------------------------------------------------------------------------------------------…
Strigamia maritima	AFFK01000794.g529.t1	---------------------------------------------------------------------------------------------------------------------------------------------------------------------------------------------------------------------------------------------------------------------------------------------------------------------------------------------------------------------------------------------------------------…
Strigamia maritima	JH430210.g1652.t1	---------------------------------------------------------------------------------------------------------------------------------------------------------------------------------------------------------------------------------------------------------------------------------------------------------------------------------------------------------------------------------------------------------------…
Strigamia maritima	JH430524.g2485.t1	---------------------------------------------------------------------------------------------------------------------------------------------------------------------------------------------------------------------------------------------------------------------------------------------------------------------------------------------------------------------------------------------------------------…
Strigamia maritima	AFFK01018426.g5117.t1	---------------------------------------------------------------------------------------------------------------------------------------------------------------------------------------------------------------------------------------------------------------------------------------------------------------------------------------------------------------------------------------------------------------…
Strigamia maritima	JH430963.g1664.t1	---------------------------------------------------------------------------------------------------------------------------------------------------------------------------------------------------------------------------------------------------------------------------------------------------------------------------------------------------------------------------------------------------------------…
Strigamia maritima	JH431410.g5904.t1	---------------------------------------------------------------------------------------------------------------------------------------------------------------------------------------------------------------------------------------------------------------------------------------------------------------------------------------------------------------------------------------------------------------…
Strigamia maritima	JH431598.g3506.t1	---------------------------------------------------------------------------------------------------------------------------------------------------------------------------------------------------------------------------------------------------------------------------------------------------------------------------------------------------------------------------------------------------------------…
Strigamia maritima	JH431287.g2462.t1	---------------------------------------------------------------------------------------------------------------------------------------------------------------------------------------------------------------------------------------------------------------------------------------------------------------------------------------------------------------------------------------------------------------…
Strigamia maritima	JH431410.g5901.t1	---------------------------------------------------------------------------------------------------------------------------------------------------------------------------------------------------------------------------------------------------------------------------------------------------------------------------------------------------------------------------------------------------------------…
Strigamia maritima	AFFK01007868.g671.t1	---------------------------------------------------------------------------------------------------------------------------------------------------------------------------------------------------------------------------------------------------------------------------------------------------------------------------------------------------------------------------------------------------------------…
Strigamia maritima	AFFK01018575.g1465.t1	---------------------------------------------------------------------------------------------------------------------------------------------------------------------------------------------------------------------------------------------------------------------------------------------------------------------------------------------------------------------------------------------------------------…
Strigamia maritima	SMAR002662|m.604 SMAR002662|g.604 type:complete len:192 gc:universal SMAR002662:4237-4812(+)	---------------------------------------------------------------------------------------------------------------------------------------------------------------------------------------------------------------------------------------------------------------------------------------------------------------------------------------------------------------------------------------------------------------…
Strigamia maritima	AFFK01017802.g2555.t1	---------------------------------------------------------------------------------------------------------------------------------------------------------------------------------------------------------------------------------------------------------------------------------------------------------------------------------------------------------------------------------------------------------------…
Strigamia maritima	SMAR001304|m.475 SMAR001304|g.475 type:complete len:146 gc:universal SMAR001304:9594-10031(+)	---------------------------------------------------------------------------------------------------------------------------------------------------------------------------------------------------------------------------------------------------------------------------------------------------------------------------------------------------------------------------------------------------------------…
Strigamia maritima	JH430522.g1621.t1	---------------------------------------------------------------------------------------------------------------------------------------------------------------------------------------------------------------------------------------------------------------------------------------------------------------------------------------------------------------------------------------------------------------…
Strigamia maritima	JH429927.g4838.t1	---------------------------------------------------------------------------------------------------------------------------------------------------------------------------------------------------------------------------------------------------------------------------------------------------------------------------------------------------------------------------------------------------------------…
Strigamia maritima	JH431088.g5741.t1	---------------------------------------------------------------------------------------------------------------------------------------------------------------------------------------------------------------------------------------------------------------------------------------------------------------------------------------------------------------------------------------------------------------…
Strigamia maritima	JH431536.g4365.t1	--------------------------------------------------------------------------------------------------------------------------------------------------------------------------------M------------------------------------------------------------------------------------------------------------------------------------------------------------------------------------------------------------------------------…
Strigamia maritima	JH431281.g3006.t1	---------------------------------------------------------------------------------------------------------------------------------------------------------------------------------------------------------------------------------------------------------------------------------------------------------------------------------------------------------------------------------------------------------------…
Strigamia maritima	SMAR011769|m.101 SMAR011769|g.101 type:complete len:1040 gc:universal SMAR011769:7001-10120(+)	--------------------------------------------------------------------------------------------------------------------------------------------------------------------------------MP-----------------------------------------------------------------------------------------------------------------------------------------------------------------------------------------------------------------------------…
Strigamia maritima	TRINITY_DN9170_c15_g1_i6	---------------------------------------------------------------------------------------------------------------------------------------------------------------------------------------------------------------------------------------------------------------------------------------------------------------------------------------------------------------------------------------------------------------…
Strigamia maritima	SMAR007715|m.148 SMAR007715|g.148 type:complete len:104 gc:universal SMAR007715:8098-8409(+)	---------------------------------------------------------------------------------------------------------------------------------------------------------------------------------------------------------------------------------------------------------------------------------------------------------------------------------------------------------------------------------------------------------------…
Strigamia maritima	JH431281.g3004.t1	---------------------------------------------------------------------------------------------------------------------------------------------------------------------------------------------------------------------------------------------------------------------------------------------------------------------------------------------------------------------------------------------------------------…
Strigamia maritima	SMAR001027|m.78 SMAR001027|g.78 type:complete len:103 gc:universal SMAR001027:9273-9581(+)	---------------------------------------------------------------------------------------------------------------------------------------------------------------------------------------------------------------------------------------------------------------------------------------------------------------------------------------------------------------------------------------------------------------…
Strigamia maritima	JH431466.g4739.t1	---------------------------------------------------------------------------------------------------------------------------------------------------------------------------------------------------------------------------------------------------------------------------------------------------------------------------------------------------------------------------------------------------------------…
Strigamia maritima	AFFK01001070.g204.t1	---------------------------------------------------------------------------------------------------------------------------------------------------------------------------------------------------------------------------------------------------------------------------------------------------------------------------------------------------------------------------------------------------------------…
Strigamia maritima	SMAR007255|m.611 SMAR007255|g.611 type:5prime_partial len:403 gc:universal SMAR007255:2-1210(+)	---------------------------------------------------------------------------------------------------------------------------------------------------------------------------------------------------------------------------------------------------------------------------------------------------------------------------------------------------------------------------------------------------------------…
Strigamia maritima	AFFK01020722.g2541.t1	---------------------------------------------------------------------------------------------------------------------------------------------------------------------------------------------------------------------------------------------------------------------------------------------------------------------------------------------------------------------------------------------------------------…
Strigamia maritima	SMAR006200|m.683 SMAR006200|g.683 type:complete len:154 gc:universal SMAR006200:7464-7925(+)	---------------------------------------------------------------------------------------------------------------------------------------------------------------------------------------------------------------------------------------------------------------------------------------------------------------------------------------------------------------------------------------------------------------…
Strigamia maritima	SMAR012315|m.728 SMAR012315|g.728 type:complete len:116 gc:universal SMAR012315:5301-5648(+)	---------------------------------------------------------------------------------------------------------------------------------------------------------------------------------------------------------------------------------------------------------------------------------------------------------------------------------------------------------------------------------------------------------------…
Strigamia maritima	JH432128.g2053.t1	---------------------------------------------------------------------------------------------------------------------------------------------------------------------------------------------------------------------------------------------------------------------------------------------------------------------------------------------------------------------------------------------------------------…
Strigamia maritima	AFFK01008596.g2.t1	---------------------------------------------------------------------------------------------------------------------------------------------------------------------------------------------------------------------------------------------------------------------------------------------------------------------------------------------------------------------------------------------------------------…
Strigamia maritima	JH432164.g3805.t1	---------------------------------------------------------------------------------------------------------------------------------------------------------------------------------------------------------------------------------------------------------------------------------------------------------------------------------------------------------------------------------------------------------------…
Strigamia maritima	SMAR000325|m.105 SMAR000325|g.105 type:complete len:488 gc:universal SMAR000325:6582-8045(+)	---------------------------------------------------------------------------------------------------------------------------------------------------------------------------------------------------------------------------------------------------------------------------------------------------------------------------------------------------------------------------------------------------------------…
Strigamia maritima	JH429927.g4847.t1	---------------------------------------------------------------------------------------------------------------------------------------------------------------------------------------------------------------------------------------------------------------------------------------------------------------------------------------------------------------------------------------------------------------…
Strigamia maritima	SMAR001164|m.45 SMAR001164|g.45 type:complete len:351 gc:universal SMAR001164:8434-9486(+)	---------------------------------------------------------------------------------------------------------------------------------------------------------------------------------------------------------------------------------------------------------------------------------------------------------------------------------------------------------------------------------------------------------------…
Strigamia maritima	AFFK01020200.g3159.t1	---------------------------------------------------------------------------------------------------------------------------------------------------------------------------------------------------------------------------------------------------------------------------------------------------------------------------------------------------------------------------------------------------------------…
Strigamia maritima	JH430709.g4115.t1	---------------------------------------------------------------------------------------------------------------------------------------------------------------------------------------------------------------------------------------------------------------------------------------------------------------------------------------------------------------------------------------------------------------…
Strigamia maritima	SMAR012255|m.249 SMAR012255|g.249 type:complete len:533 gc:universal SMAR012255:90-1688(+)	--------------------------------------------------------------------------------------------------------------------------------------------------------------------------------MD-----------------------------------------------------------------------------------------------------------------------------------------------------------------------------------------------------------------------------…
Strigamia maritima	JH432123.g3818.t1	---------------------------------------------------------------------------------------------------------------------------------------------------------------------------------------------------------------------------------------------------------------------------------------------------------------------------------------------------------------------------------------------------------------…
Strigamia maritima	SMAR000031|m.653 SMAR000031|g.653 type:complete len:451 gc:universal SMAR000031:6299-7651(+)	---------------------------------------------------------------------------------------------------------------------------------------------------------------------------------------------------------------------------------------------------------------------------------------------------------------------------------------------------------------------------------------------------------------…
Strigamia maritima	SMAR012725|m.412 SMAR012725|g.412 type:complete len:284 gc:universal SMAR012725:1119-1970(+)	---------------------------------------------------------------------------------------------------------------------------------------------------------------------------------------------------------------------------------------------------------------------------------------------------------------------------------------------------------------------------------------------------------------…
Strigamia maritima	SMAR001105|m.493 SMAR001105|g.493 type:complete len:744 gc:universal SMAR001105:934-3165(+)	---------------------------------------------------------------------------------------------------------------------------------------------------------------------------------------------------------------------------------------------------------------------------------------------------------------------------------------------------------------------------------------------------------------…
Strigamia maritima	SMAR014194|m.607 SMAR014194|g.607 type:complete len:299 gc:universal SMAR014194:9188-10084(+)	---------------------------------------------------------------------------------------------------------------------------------------------------------------------------------------------------------------------------------------------------------------------------------------------------------------------------------------------------------------------------------------------------------------…
Strigamia maritima	JH432218.g3281.t1	---------------------------------------------------------------------------------------------------------------------------------------------------------------------------------------------------------------------------------------------------------------------------------------------------------------------------------------------------------------------------------------------------------------…
Strigamia maritima	JH431881.g2434.t1	---------------------------------------------------------------------------------------------------------------------------------------------------------------------------------------------------------------------------------------------------------------------------------------------------------------------------------------------------------------------------------------------------------------…
Strigamia maritima	AFFK01000898.g259.t1	---------------------------------------------------------------------------------------------------------------------------------------------------------------------------------------------------------------------------------------------------------------------------------------------------------------------------------------------------------------------------------------------------------------…
Strigamia maritima	SMAR014194|m.606 SMAR014194|g.606 type:complete len:377 gc:universal SMAR014194:7958-9088(+)	---------------------------------------------------------------------------------------------------------------------------------------------------------------------------------------------------------------------------------------------------------------------------------------------------------------------------------------------------------------------------------------------------------------…
Strigamia maritima	SMAR006519|m.489 SMAR006519|g.489 type:complete len:144 gc:universal SMAR006519:8613-9044(+)	---------------------------------------------------------------------------------------------------------------------------------------------------------------------------------------------------------------------------------------------------------------------------------------------------------------------------------------------------------------------------------------------------------------…
Strigamia maritima	SMAR001024|m.40 SMAR001024|g.40 type:3prime_partial len:319 gc:universal SMAR001024:9160-10113(+)	---------------------------------------------------------------------------------------------------------------------------------------------------------------------------------------------------------------------------------------------------------------------------------------------------------------------------------------------------------------------------------------------------------------…
Strigamia maritima	JH429798.g3909.t1	---------------------------------------------------------------------------------------------------------------------------------------------------------------------------------------------------------------------------------------------------------------------------------------------------------------------------------------------------------------------------------------------------------------…
Strigamia maritima	SMAR000685|m.670 SMAR000685|g.670 type:complete len:162 gc:universal SMAR000685:6616-7101(+)	---------------------------------------------------------------------------------------------------------------------------------------------------------------------------------------------------------------------------------------------------------------------------------------------------------------------------------------------------------------------------------------------------------------…
Strigamia maritima	SMAR005727|m.633 SMAR005727|g.633 type:3prime_partial len:229 gc:universal SMAR005727:8211-8894(+)	---------------------------------------------------------------------------------------------------------------------------------------------------------------------------------------------------------------------------------------------------------------------------------------------------------------------------------------------------------------------------------------------------------------…
Strigamia maritima	SMAR003828|m.393 SMAR003828|g.393 type:complete len:628 gc:universal SMAR003828:5158-7041(+)	---------------------------------------------------------------------------------------------------------------------------------------------------------------------------------------------------------------------------------------------------------------------------------------------------------------------------------------------------------------------------------------------------------------…
Strigamia maritima	SMAR000923|m.779 SMAR000923|g.779 type:complete len:174 gc:universal SMAR000923:1503-2024(+)	---------------------------------------------------------------------------------------------------------------------------------------------------------------------------------------------------------------------------------------------------------------------------------------------------------------------------------------------------------------------------------------------------------------…
Strigamia maritima	SMAR000685|m.674 SMAR000685|g.674 type:complete len:112 gc:universal SMAR000685:7150-7485(+)	---------------------------------------------------------------------------------------------------------------------------------------------------------------------------------------------------------------------------------------------------------------------------------------------------------------------------------------------------------------------------------------------------------------…
Strigamia maritima	SMAR001300|m.61 SMAR001300|g.61 type:complete len:232 gc:universal SMAR001300:9011-9706(+)	---------------------------------------------------------------------------------------------------------------------------------------------------------------------------------------------------------------------------------------------------------------------------------------------------------------------------------------------------------------------------------------------------------------…
Strigamia maritima	SMAR014121|m.96 SMAR014121|g.96 type:complete len:489 gc:universal SMAR014121:4129-5595(+)	---------------------------------------------------------------------------------------------------------------------------------------------------------------------------------------------------------------------------------------------------------------------------------------------------------------------------------------------------------------------------------------------------------------…
Strigamia maritima	SMAR001932|m.638 SMAR001932|g.638 type:complete len:492 gc:universal SMAR001932:5078-6553(+)	---------------------------------------------------------------------------------------------------------------------------------------------------------------------------------------------------------------------------------------------------------------------------------------------------------------------------------------------------------------------------------------------------------------…
Strigamia maritima	SMAR001391|m.626 SMAR001391|g.626 type:complete len:121 gc:universal SMAR001391:7944-8306(+)	---------------------------------------------------------------------------------------------------------------------------------------------------------------------------------------------------------------------------------------------------------------------------------------------------------------------------------------------------------------------------------------------------------------…
Strigamia maritima	SMAR000339|m.645 SMAR000339|g.645 type:complete len:145 gc:universal SMAR000339:3792-4226(+)	---------------------------------------------------------------------------------------------------------------------------------------------------------------------------------------------------------------------------------------------------------------------------------------------------------------------------------------------------------------------------------------------------------------…
Strigamia maritima	SMAR001448|m.808 SMAR001448|g.808 type:complete len:310 gc:universal SMAR001448:7620-8549(+)	---------------------------------------------------------------------------------------------------------------------------------------------------------------------------------------------------------------------------------------------------------------------------------------------------------------------------------------------------------------------------------------------------------------…
Strigamia maritima	SMAR000250|m.405 SMAR000250|g.405 type:complete len:106 gc:universal SMAR000250:10297-10614(+)	---------------------------------------------------------------------------------------------------------------------------------------------------------------------------------------------------------------------------------------------------------------------------------------------------------------------------------------------------------------------------------------------------------------…
Strigamia maritima	SMAR001356|m.456 SMAR001356|g.456 type:complete len:246 gc:universal SMAR001356:6702-7439(+)	---------------------------------------------------------------------------------------------------------------------------------------------------------------------------------------------------------------------------------------------------------------------------------------------------------------------------------------------------------------------------------------------------------------…
Strigamia maritima	SMAR000922|m.464 SMAR000922|g.464 type:complete len:301 gc:universal SMAR000922:7962-8864(+)	---------------------------------------------------------------------------------------------------------------------------------------------------------------------------------------------------------------------------------------------------------------------------------------------------------------------------------------------------------------------------------------------------------------…
Strigamia maritima	SMAR005322|m.430 SMAR005322|g.430 type:complete len:169 gc:universal SMAR005322:10162-10668(+)	---------------------------------------------------------------------------------------------------------------------------------------------------------------------------------------------------------------------------------------------------------------------------------------------------------------------------------------------------------------------------------------------------------------…
Strigamia maritima	SMAR001651|m.213 SMAR001651|g.213 type:complete len:841 gc:universal SMAR001651:3179-5701(+)	---------------------------------------------------------------------------------------------------------------------------------------------------------------------------------------------------------------------------------------------------------------------------------------------------------------------------------------------------------------------------------------------------------------…
Strigamia maritima	SMAR001523|m.248 SMAR001523|g.248 type:complete len:207 gc:universal SMAR001523:5854-6474(+)	---------------------------------------------------------------------------------------------------------------------------------------------------------------------------------------------------------------------------------------------------------------------------------------------------------------------------------------------------------------------------------------------------------------…
Strigamia maritima	SMAR000229|m.166 SMAR000229|g.166 type:complete len:314 gc:universal SMAR000229:8860-9801(+)	---------------------------------------------------------------------------------------------------------------------------------------------------------------------------------------------------------------------------------------------------------------------------------------------------------------------------------------------------------------------------------------------------------------…
Strigamia maritima	SMAR005936|m.117 SMAR005936|g.117 type:complete len:238 gc:universal SMAR005936:9371-10084(+)	---------------------------------------------------------------------------------------------------------------------------------------------------------------------------------------------------------------------------------------------------------------------------------------------------------------------------------------------------------------------------------------------------------------…
Strigamia maritima	SMAR003787|m.352 SMAR003787|g.352 type:complete len:213 gc:universal SMAR003787:13630-14268(+)	---------------------------------------------------------------------------------------------------------------------------------------------------------------------------------------------------------------------------------------------------------------------------------------------------------------------------------------------------------------------------------------------------------------…
Strigamia maritima	SMAR003129|m.849 SMAR003129|g.849 type:complete len:246 gc:universal SMAR003129:1281-2018(+)	---------------------------------------------------------------------------------------------------------------------------------------------------------------------------------------------------------------------------------------------------------------------------------------------------------------------------------------------------------------------------------------------------------------…
Strigamia maritima	SMAR001300|m.64 SMAR001300|g.64 type:complete len:150 gc:universal SMAR001300:8239-8688(+)	---------------------------------------------------------------------------------------------------------------------------------------------------------------------------------------------------------------------------------------------------------------------------------------------------------------------------------------------------------------------------------------------------------------…
Strigamia maritima	AFFK01013826.g1817.t1	---------------------------------------------------------------------------------------------------------------------------------------------------------------------------------------------------------------------------------------------------------------------------------------------------------------------------------------------------------------------------------------------------------------…
Strigamia maritima	SMAR003761|m.349 SMAR003761|g.349 type:complete len:111 gc:universal SMAR003761:8646-8978(+)	---------------------------------------------------------------------------------------------------------------------------------------------------------------------------------------------------------------------------------------------------------------------------------------------------------------------------------------------------------------------------------------------------------------…
Strigamia maritima	JH429849.g2272.t1	---------------------------------------------------------------------------------------------------------------------------------------------------------------------------------------------------------------------------------------------------------------------------------------------------------------------------------------------------------------------------------------------------------------…
Strigamia maritima	SMAR001654|m.289 SMAR001654|g.289 type:complete len:156 gc:universal SMAR001654:494-961(+)	---------------------------------------------------------------------------------------------------------------------------------------------------------------------------------------------------------------------------------------------------------------------------------------------------------------------------------------------------------------------------------------------------------------…
Strigamia maritima	SMAR003618|m.406 SMAR003618|g.406 type:complete len:442 gc:universal SMAR003618:4395-5720(+)	---------------------------------------------------------------------------------------------------------------------------------------------------------------------------------------------------------------------------------------------------------------------------------------------------------------------------------------------------------------------------------------------------------------…
Strigamia maritima	SMAR005936|m.113 SMAR005936|g.113 type:complete len:606 gc:universal SMAR005936:7501-9318(+)	---------------------------------------------------------------------------------------------------------------------------------------------------------------------------------------------------------------------------------------------------------------------------------------------------------------------------------------------------------------------------------------------------------------…
Strigamia maritima	SMAR007175|m.423 SMAR007175|g.423 type:complete len:422 gc:universal SMAR007175:4670-5935(+)	---------------------------------------------------------------------------------------------------------------------------------------------------------------------------------------------------------------------------------------------------------------------------------------------------------------------------------------------------------------------------------------------------------------…
Strigamia maritima	SMAR012314|m.718 SMAR012314|g.718 type:3prime_partial len:326 gc:universal SMAR012314:9277-10251(+)	---------------------------------------------------------------------------------------------------------------------------------------------------------------------------------------------------------------------------------------------------------------------------------------------------------------------------------------------------------------------------------------------------------------…
Strigamia maritima	SMAR011247|m.831 SMAR011247|g.831 type:complete len:721 gc:universal SMAR011247:1800-3962(+)	---------------------------------------------------------------------------------------------------------------------------------------------------------------------------------------------------------------------------------------------------------------------------------------------------------------------------------------------------------------------------------------------------------------…
Strigamia maritima	SMAR001458|m.443 SMAR001458|g.443 type:complete len:480 gc:universal SMAR001458:12230-13669(+)	---------------------------------------------------------------------------------------------------------------------------------------------------------------------------------------------------------------------------------------------------------------------------------------------------------------------------------------------------------------------------------------------------------------…
Strigamia maritima	SMAR000229|m.165 SMAR000229|g.165 type:complete len:382 gc:universal SMAR000229:7576-8721(+)	---------------------------------------------------------------------------------------------------------------------------------------------------------------------------------------------------------------------------------------------------------------------------------------------------------------------------------------------------------------------------------------------------------------…
Strigamia maritima	SMAR003604|m.368 SMAR003604|g.368 type:complete len:367 gc:universal SMAR003604:13719-14819(+)	---------------------------------------------------------------------------------------------------------------------------------------------------------------------------------------------------------------------------------------------------------------------------------------------------------------------------------------------------------------------------------------------------------------…
Strigamia maritima	SMAR011203|m.751 SMAR011203|g.751 type:complete len:105 gc:universal SMAR011203:8371-8685(+)	---------------------------------------------------------------------------------------------------------------------------------------------------------------------------------------------------------------------------------------------------------------------------------------------------------------------------------------------------------------------------------------------------------------…
Strigamia maritima	SMAR001067|m.559 SMAR001067|g.559 type:complete len:542 gc:universal SMAR001067:7444-9069(+)	---------------------------------------------------------------------------------------------------------------------------------------------------------------------------------------------------------------------------------------------------------------------------------------------------------------------------------------------------------------------------------------------------------------…
Strigamia maritima	SMAR001458|m.449 SMAR001458|g.449 type:complete len:168 gc:universal SMAR001458:13615-14118(+)	---------------------------------------------------------------------------------------------------------------------------------------------------------------------------------------------------------------------------------------------------------------------------------------------------------------------------------------------------------------------------------------------------------------…
Strigamia maritima	SMAR005011|m.591 SMAR005011|g.591 type:complete len:118 gc:universal SMAR005011:10899-11252(+)	---------------------------------------------------------------------------------------------------------------------------------------------------------------------------------------------------------------------------------------------------------------------------------------------------------------------------------------------------------------------------------------------------------------…
Strigamia maritima	SMAR001391|m.618 SMAR001391|g.618 type:complete len:211 gc:universal SMAR001391:7275-7907(+)	---------------------------------------------------------------------------------------------------------------------------------------------------------------------------------------------------------------------------------------------------------------------------------------------------------------------------------------------------------------------------------------------------------------…
Strigamia maritima	SMAR014121|m.95 SMAR014121|g.95 type:complete len:548 gc:universal SMAR014121:6515-8158(+)	---------------------------------------------------------------------------------------------------------------------------------------------------------------------------------------------------------------------------------------------------------------------------------------------------------------------------------------------------------------------------------------------------------------…
Strigamia maritima	SMAR003129|m.848 SMAR003129|g.848 type:complete len:271 gc:universal SMAR003129:376-1188(+)	---------------------------------------------------------------------------------------------------------------------------------------------------------------------------------------------------------------------------------------------------------------------------------------------------------------------------------------------------------------------------------------------------------------…
Strigamia maritima	SMAR000250|m.399 SMAR000250|g.399 type:complete len:495 gc:universal SMAR000250:8614-10098(+)	---------------------------------------------------------------------------------------------------------------------------------------------------------------------------------------------------------------------------------------------------------------------------------------------------------------------------------------------------------------------------------------------------------------…
Strigamia maritima	SMAR000922|m.459 SMAR000922|g.459 type:complete len:581 gc:universal SMAR000922:6160-7902(+)	--------------------------------------------------------------------------------------------------------------------------------------------------------------------------------M------------------------------------------------------------------------------------------------------------------------------------------------------------------------------------------------------------------------------…
Strigamia maritima	AFFK01000929.g427.t1	---------------------------------------------------------------------------------------------------------------------------------------------------------------------------------------------------------------------------------------------------------------------------------------------------------------------------------------------------------------------------------------------------------------…
Strigamia maritima	SMAR005011|m.594 SMAR005011|g.594 type:complete len:106 gc:universal SMAR005011:10522-10839(+)	---------------------------------------------------------------------------------------------------------------------------------------------------------------------------------------------------------------------------------------------------------------------------------------------------------------------------------------------------------------------------------------------------------------…
Strigamia maritima	SMAR003787|m.354 SMAR003787|g.354 type:complete len:133 gc:universal SMAR003787:13268-13666(+)	---------------------------------------------------------------------------------------------------------------------------------------------------------------------------------------------------------------------------------------------------------------------------------------------------------------------------------------------------------------------------------------------------------------…
Strigamia maritima	SMAR008817|m.219 SMAR008817|g.219 type:complete len:239 gc:universal SMAR008817:8853-9569(+)	---------------------------------------------------------------------------------------------------------------------------------------------------------------------------------------------------------------------------------------------------------------------------------------------------------------------------------------------------------------------------------------------------------------…
Strigamia maritima	SMAR001113|m.556 SMAR001113|g.556 type:complete len:294 gc:universal SMAR001113:2607-3488(+)	---------------------------------------------------------------------------------------------------------------------------------------------------------------------------------------------------------------------------------------------------------------------------------------------------------------------------------------------------------------------------------------------------------------…
Strigamia maritima	SMAR000476|m.24 SMAR000476|g.24 type:complete len:351 gc:universal SMAR000476:8907-9959(+)	---------------------------------------------------------------------------------------------------------------------------------------------------------------------------------------------------------------------------------------------------------------------------------------------------------------------------------------------------------------------------------------------------------------…
Strigamia maritima	SMAR000028|m.416 SMAR000028|g.416 type:complete len:413 gc:universal SMAR000028:4731-5969(+)	---------------------------------------------------------------------------------------------------------------------------------------------------------------------------------------------------------------------------------------------------------------------------------------------------------------------------------------------------------------------------------------------------------------…
Strigamia maritima	JH431677.g4870.t1	---------------------------------------------------------------------------------------------------------------------------------------------------------------------------------------------------------------------------------------------------------------------------------------------------------------------------------------------------------------------------------------------------------------…
Strigamia maritima	SMAR006524|m.305 SMAR006524|g.305 type:complete len:313 gc:universal SMAR006524:9404-10342(+)	---------------------------------------------------------------------------------------------------------------------------------------------------------------------------------------------------------------------------------------------------------------------------------------------------------------------------------------------------------------------------------------------------------------…
Strigamia maritima	SMAR005011|m.584 SMAR005011|g.584 type:complete len:692 gc:universal SMAR005011:6947-9022(+)	---------------------------------------------------------------------------------------------------------------------------------------------------------------------------------------------------------------------------------------------------------------------------------------------------------------------------------------------------------------------------------------------------------------…
Strigamia maritima	AFFK01019659.g2588.t1	---------------------------------------------------------------------------------------------------------------------------------------------------------------------------------------------------------------------------------------------------------------------------------------------------------------------------------------------------------------------------------------------------------------…
Strigamia maritima	SMAR004956|m.699 SMAR004956|g.699 type:complete len:430 gc:universal SMAR004956:2792-4081(+)	---------------------------------------------------------------------------------------------------------------------------------------------------------------------------------------------------------------------------------------------------------------------------------------------------------------------------------------------------------------------------------------------------------------…
Strigamia maritima	JH430427.g3969.t1	---------------------------------------------------------------------------------------------------------------------------------------------------------------------------------------------------------------------------------------------------------------------------------------------------------------------------------------------------------------------------------------------------------------…
Strigamia maritima	JH430390.g1348.t1	---------------------------------------------------------------------------------------------------------------------------------------------------------------------------------------------------------------------------------------------------------------------------------------------------------------------------------------------------------------------------------------------------------------…
Strigamia maritima	JH429975.g1552.t1	---------------------------------------------------------------------------------------------------------------------------------------------------------------------------------------------------------------------------------------------------------------------------------------------------------------------------------------------------------------------------------------------------------------…
Strigamia maritima	JH429685.g3301.t1	---------------------------------------------------------------------------------------------------------------------------------------------------------------------------------------------------------------------------------------------------------------------------------------------------------------------------------------------------------------------------------------------------------------…
Strigamia maritima	SMAR000324|m.631 SMAR000324|g.631 type:complete len:119 gc:universal SMAR000324:10888-11244(+)	---------------------------------------------------------------------------------------------------------------------------------------------------------------------------------------------------------------------------------------------------------------------------------------------------------------------------------------------------------------------------------------------------------------…
Strigamia maritima	SMAR004956|m.700 SMAR004956|g.700 type:complete len:252 gc:universal SMAR004956:2050-2805(+)	---------------------------------------------------------------------------------------------------------------------------------------------------------------------------------------------------------------------------------------------------------------------------------------------------------------------------------------------------------------------------------------------------------------…
Strigamia maritima	AFFK01019643.g2096.t1	---------------------------------------------------------------------------------------------------------------------------------------------------------------------------------------------------------------------------------------------------------------------------------------------------------------------------------------------------------------------------------------------------------------…
Strigamia maritima	SMAR001013|m.875 SMAR001013|g.875 type:complete len:323 gc:universal SMAR001013:6141-7109(+)	---------------------------------------------------------------------------------------------------------------------------------------------------------------------------------------------------------------------------------------------------------------------------------------------------------------------------------------------------------------------------------------------------------------…
Strigamia maritima	JH430261.g1618.t1	---------------------------------------------------------------------------------------------------------------------------------------------------------------------------------------------------------------------------------------------------------------------------------------------------------------------------------------------------------------------------------------------------------------…
Strigamia maritima	JH431330.g4917.t1	---------------------------------------------------------------------------------------------------------------------------------------------------------------------------------------------------------------------------------------------------------------------------------------------------------------------------------------------------------------------------------------------------------------…
Strigamia maritima	AFFK01019453.g3946.t1	---------------------------------------------------------------------------------------------------------------------------------------------------------------------------------------------------------------------------------------------------------------------------------------------------------------------------------------------------------------------------------------------------------------…
Strigamia maritima	AFFK01002287.g613.t1	---------------------------------------------------------------------------------------------------------------------------------------------------------------------------------------------------------------------------------------------------------------------------------------------------------------------------------------------------------------------------------------------------------------…
Strigamia maritima	SMAR001729|m.732 SMAR001729|g.732 type:complete len:346 gc:universal SMAR001729:2460-3497(+)	---------------------------------------------------------------------------------------------------------------------------------------------------------------------------------------------------------------------------------------------------------------------------------------------------------------------------------------------------------------------------------------------------------------…
Strigamia maritima	AFFK01016826.g2074.t1	---------------------------------------------------------------------------------------------------------------------------------------------------------------------------------------------------------------------------------------------------------------------------------------------------------------------------------------------------------------------------------------------------------------…
Strigamia maritima	SMAR012590|m.194 SMAR012590|g.194 type:complete len:592 gc:universal SMAR012590:7963-9738(+)	---------------------------------------------------------------------------------------------------------------------------------------------------------------------------------------------------------------------------------------------------------------------------------------------------------------------------------------------------------------------------------------------------------------…
Strigamia maritima	JH432163.g4257.t1	---------------------------------------------------------------------------------------------------------------------------------------------------------------------------------------------------------------------------------------------------------------------------------------------------------------------------------------------------------------------------------------------------------------…
Strigamia maritima	JH430547.g3352.t1	---------------------------------------------------------------------------------------------------------------------------------------------------------------------------------------------------------------------------------------------------------------------------------------------------------------------------------------------------------------------------------------------------------------…
Strigamia maritima	JH430422.g2314.t1	---------------------------------------------------------------------------------------------------------------------------------------------------------------------------------------------------------------------------------------------------------------------------------------------------------------------------------------------------------------------------------------------------------------…
Strigamia maritima	AFFK01006194.g971.t1	---------------------------------------------------------------------------------------------------------------------------------------------------------------------------------------------------------------------------------------------------------------------------------------------------------------------------------------------------------------------------------------------------------------…
Strigamia maritima	JH429656.g1845.t1	---------------------------------------------------------------------------------------------------------------------------------------------------------------------------------------------------------------------------------------------------------------------------------------------------------------------------------------------------------------------------------------------------------------…
Strigamia maritima	JH430366.g3251.t1	---------------------------------------------------------------------------------------------------------------------------------------------------------------------------------------------------------------------------------------------------------------------------------------------------------------------------------------------------------------------------------------------------------------…
Strigamia maritima	AFFK01012924.g3791.t1	---------------------------------------------------------------------------------------------------------------------------------------------------------------------------------------------------------------------------------------------------------------------------------------------------------------------------------------------------------------------------------------------------------------…
Strigamia maritima	JH430775.g1175.t1	---------------------------------------------------------------------------------------------------------------------------------------------------------------------------------------------------------------------------------------------------------------------------------------------------------------------------------------------------------------------------------------------------------------…
Strigamia maritima	AFFK01015453.g1127.t1	---------------------------------------------------------------------------------------------------------------------------------------------------------------------------------------------------------------------------------------------------------------------------------------------------------------------------------------------------------------------------------------------------------------…
Strigamia maritima	AFFK01018260.g1689.t1	---------------------------------------------------------------------------------------------------------------------------------------------------------------------------------------------------------------------------------------------------------------------------------------------------------------------------------------------------------------------------------------------------------------…
Strigamia maritima	JH430950.g1945.t1	---------------------------------------------------------------------------------------------------------------------------------------------------------------------------------------------------------------------------------------------------------------------------------------------------------------------------------------------------------------------------------------------------------------…
Strigamia maritima	JH430239.g2046.t1	---------------------------------------------------------------------------------------------------------------------------------------------------------------------------------------------------------------------------------------------------------------------------------------------------------------------------------------------------------------------------------------------------------------…
Strigamia maritima	JH430601.g2219.t1	---------------------------------------------------------------------------------------------------------------------------------------------------------------------------------------------------------------------------------------------------------------------------------------------------------------------------------------------------------------------------------------------------------------…
Strigamia maritima	SMAR000541|m.787 SMAR000541|g.787 type:complete len:913 gc:universal SMAR000541:5281-8019(+)	---------------------------------------------------------------------------------------------------------------------------------------------------------------------------------------------------------------------------------------------------------------------------------------------------------------------------------------------------------------------------------------------------------------…
Strigamia maritima	JH430116.g1896.t1	---------------------------------------------------------------------------------------------------------------------------------------------------------------------------------------------------------------------------------------------------------------------------------------------------------------------------------------------------------------------------------------------------------------…
Strigamia maritima	JH431065.g1353.t1	---------------------------------------------------------------------------------------------------------------------------------------------------------------------------------------------------------------------------------------------------------------------------------------------------------------------------------------------------------------------------------------------------------------…
Strigamia maritima	AFFK01019020.g1877.t1	---------------------------------------------------------------------------------------------------------------------------------------------------------------------------------------------------------------------------------------------------------------------------------------------------------------------------------------------------------------------------------------------------------------…
Strigamia maritima	AFFK01020022.g2235.t1	---------------------------------------------------------------------------------------------------------------------------------------------------------------------------------------------------------------------------------------------------------------------------------------------------------------------------------------------------------------------------------------------------------------…
Strigamia maritima	JH430864.g2682.t1	--------------------------------------------------------------------------------------------------------------------------------------------------------------------------------MS----------------------EKD----------------------------------------------------------------------------------------------------------------------------------------------------------------------------------------------------…
Strigamia maritima	JH430404.g3468.t1	---------------------------------------------------------------------------------------------------------------------------------------------------------------------------------------------------------------------------------------------------------------------------------------------------------------------------------------------------------------------------------------------------------------…
Strigamia maritima	JH431105.g2327.t1	---------------------------------------------------------------------------------------------------------------------------------------------------------------------------------------------------------------------------------------------------------------------------------------------------------------------------------------------------------------------------------------------------------------…
Strigamia maritima	JH430427.g3967.t1	---------------------------------------------------------------------------------------------------------------------------------------------------------------------------------------------------------------------------------------------------------------------------------------------------------------------------------------------------------------------------------------------------------------…
Strigamia maritima	JH430938.g3475.t1	---------------------------------------------------------------------------------------------------------------------------------------------------------------------------------------------------------------------------------------------------------------------------------------------------------------------------------------------------------------------------------------------------------------…
Strigamia maritima	JH431173.g3148.t1	---------------------------------------------------------------------------------------------------------------------------------------------------------------------------------------------------------------------------------------------------------------------------------------------------------------------------------------------------------------------------------------------------------------…
Strigamia maritima	AFFK01016160.g1083.t1	---------------------------------------------------------------------------------------------------------------------------------------------------------------------------------------------------------------------------------------------------------------------------------------------------------------------------------------------------------------------------------------------------------------…
Strigamia maritima	SMAR000078|m.292 SMAR000078|g.292 type:complete len:973 gc:universal SMAR000078:6937-9855(+)	--------------------------------------------------------------------------------------------------------------------------------------------------------------------------------M------------------------------------------------------------------------------------------------------------------------------------------------------------------------------------------------------------------------------…
Strigamia maritima	JH429648.g3627.t1	---------------------------------------------------------------------------------------------------------------------------------------------------------------------------------------------------------------------------------------------------------------------------------------------------------------------------------------------------------------------------------------------------------------…
Strigamia maritima	AFFK01017356.g988.t1	---------------------------------------------------------------------------------------------------------------------------------------------------------------------------------------------------------------------------------------------------------------------------------------------------------------------------------------------------------------------------------------------------------------…
Strigamia maritima	AFFK01006589.g344.t1	---------------------------------------------------------------------------------------------------------------------------------------------------------------------------------------------------------------------------------------------------------------------------------------------------------------------------------------------------------------------------------------------------------------…
Strigamia maritima	AFFK01009101.g758.t1	---------------------------------------------------------------------------------------------------------------------------------------------------------------------------------------------------------------------------------------------------------------------------------------------------------------------------------------------------------------------------------------------------------------…
Strigamia maritima	AFFK01017219.g2091.t1	---------------------------------------------------------------------------------------------------------------------------------------------------------------------------------------------------------------------------------------------------------------------------------------------------------------------------------------------------------------------------------------------------------------…
Strigamia maritima	JH429571.g1614.t1	---------------------------------------------------------------------------------------------------------------------------------------------------------------------------------------------------------------------------------------------------------------------------------------------------------------------------------------------------------------------------------------------------------------…
Strigamia maritima	AFFK01014989.g1089.t1	---------------------------------------------------------------------------------------------------------------------------------------------------------------------------------------------------------------------------------------------------------------------------------------------------------------------------------------------------------------------------------------------------------------…
Strigamia maritima	JH430235.g1471.t1	---------------------------------------------------------------------------------------------------------------------------------------------------------------------------------------------------------------------------------------------------------------------------------------------------------------------------------------------------------------------------------------------------------------…
Strigamia maritima	AFFK01008514.g394.t1	---------------------------------------------------------------------------------------------------------------------------------------------------------------------------------------------------------------------------------------------------------------------------------------------------------------------------------------------------------------------------------------------------------------…
Strigamia maritima	JH430822.g3462.t1	---------------------------------------------------------------------------------------------------------------------------------------------------------------------------------------------------------------------------------------------------------------------------------------------------------------------------------------------------------------------------------------------------------------…
Strigamia maritima	SMAR000971|m.773 SMAR000971|g.773 type:complete len:859 gc:universal SMAR000971:6597-9173(+)	--------------------------------------------------------------------------------------------------------------------------------------------------------------------------------M------------------------------------------------------------------------------------------------------------------------------------------------------------------------------------------------------------------------------…
Strigamia maritima	AFFK01014491.g1909.t1	---------------------------------------------------------------------------------------------------------------------------------------------------------------------------------------------------------------------------------------------------------------------------------------------------------------------------------------------------------------------------------------------------------------…
Strigamia maritima	JH431819.g5696.t1	---------------------------------------------------------------------------------------------------------------------------------------------------------------------------------------------------------------------------------------------------------------------------------------------------------------------------------------------------------------------------------------------------------------…
Strigamia maritima	SMAR000234|m.858 SMAR000234|g.858 type:complete len:366 gc:universal SMAR000234:5171-6268(+)	---------------------------------------------------------------------------------------------------------------------------------------------------------------------------------------------------------------------------------------------------------------------------------------------------------------------------------------------------------------------------------------------------------------…
Strigamia maritima	JH429837.g1673.t1	---------------------------------------------------------------------------------------------------------------------------------------------------------------------------------------------------------------------------------------------------------------------------------------------------------------------------------------------------------------------------------------------------------------…
Strigamia maritima	AFFK01014511.g2435.t1	---------------------------------------------------------------------------------------------------------------------------------------------------------------------------------------------------------------------------------------------------------------------------------------------------------------------------------------------------------------------------------------------------------------…
Strigamia maritima	JH431509.g4664.t1	---------------------------------------------------------------------------------------------------------------------------------------------------------------------------------------------------------------------------------------------------------------------------------------------------------------------------------------------------------------------------------------------------------------…
Strigamia maritima	AFFK01020767.g3369.t1	---------------------------------------------------------------------------------------------------------------------------------------------------------------------------------------------------------------------------------------------------------------------------------------------------------------------------------------------------------------------------------------------------------------…
Strigamia maritima	AFFK01015567.g1570.t1	---------------------------------------------------------------------------------------------------------------------------------------------------------------------------------------------------------------------------------------------------------------------------------------------------------------------------------------------------------------------------------------------------------------…
Strigamia maritima	JH430377.g3448.t1	---------------------------------------------------------------------------------------------------------------------------------------------------------------------------------------------------------------------------------------------------------------------------------------------------------------------------------------------------------------------------------------------------------------…
Strigamia maritima	SMAR000028|m.415 SMAR000028|g.415 type:5prime_partial len:786 gc:universal SMAR000028:1-2358(+)	---------------------------------------------------------------------------------------------------------------------------------------------------------------------------------------------------------------------------------------------------------------------------------------------------------------------------------------------------------------------------------------------------------------…
Strigamia maritima	AFFK01018788.g1254.t1	---------------------------------------------------------------------------------------------------------------------------------------------------------------------------------------------------------------------------------------------------------------------------------------------------------------------------------------------------------------------------------------------------------------…
Strigamia maritima	SMAR000545|m.758 SMAR000545|g.758 type:complete len:504 gc:universal SMAR000545:6036-7547(+)	---------------------------------------------------------------------------------------------------------------------------------------------------------------------------------------------------------------------------------------------------------------------------------------------------------------------------------------------------------------------------------------------------------------…
Strigamia maritima	SMAR000266|m.742 SMAR000266|g.742 type:complete len:130 gc:universal SMAR000266:6561-6950(+)	---------------------------------------------------------------------------------------------------------------------------------------------------------------------------------------------------------------------------------------------------------------------------------------------------------------------------------------------------------------------------------------------------------------…
Strigamia maritima	AFFK01019272.g3038.t1	---------------------------------------------------------------------------------------------------------------------------------------------------------------------------------------------------------------------------------------------------------------------------------------------------------------------------------------------------------------------------------------------------------------…
Strigamia maritima	SMAR001246|m.482 SMAR001246|g.482 type:complete len:374 gc:universal SMAR001246:5183-6304(+)	---------------------------------------------------------------------------------------------------------------------------------------------------------------------------------------------------------------------------------------------------------------------------------------------------------------------------------------------------------------------------------------------------------------…
Strigamia maritima	JH430387.g2967.t1	---------------------------------------------------------------------------------------------------------------------------------------------------------------------------------------------------------------------------------------------------------------------------------------------------------------------------------------------------------------------------------------------------------------…
Strigamia maritima	SMAR004627|m.543 SMAR004627|g.543 type:complete len:208 gc:universal SMAR004627:1562-2185(+)	---------------------------------------------------------------------------------------------------------------------------------------------------------------------------------------------------------------------------------------------------------------------------------------------------------------------------------------------------------------------------------------------------------------…
Strigamia maritima	AFFK01019344.g2796.t1	---------------------------------------------------------------------------------------------------------------------------------------------------------------------------------------------------------------------------------------------------------------------------------------------------------------------------------------------------------------------------------------------------------------…
Strigamia maritima	SMAR003891|m.708 SMAR003891|g.708 type:complete len:171 gc:universal SMAR003891:8048-8560(+)	---------------------------------------------------------------------------------------------------------------------------------------------------------------------------------------------------------------------------------------------------------------------------------------------------------------------------------------------------------------------------------------------------------------…
Strigamia maritima	JH431416.g2078.t1	---------------------------------------------------------------------------------------------------------------------------------------------------------------------------------------------------------------------------------------------------------------------------------------------------------------------------------------------------------------------------------------------------------------…
Strigamia maritima	AFFK01002550.g514.t1	---------------------------------------------------------------------------------------------------------------------------------------------------------------------------------------------------------------------------------------------------------------------------------------------------------------------------------------------------------------------------------------------------------------…
Strigamia maritima	AFFK01020228.g3841.t1	---------------------------------------------------------------------------------------------------------------------------------------------------------------------------------------------------------------------------------------------------------------------------------------------------------------------------------------------------------------------------------------------------------------…
Strigamia maritima	SMAR011339|m.523 SMAR011339|g.523 type:complete len:453 gc:universal SMAR011339:6881-8239(+)	---------------------------------------------------------------------------------------------------------------------------------------------------------------------------------------------------------------------------------------------------------------------------------------------------------------------------------------------------------------------------------------------------------------…
Strigamia maritima	JH432051.g2848.t1	---------------------------------------------------------------------------------------------------------------------------------------------------------------------------------------------------------------------------------------------------------------------------------------------------------------------------------------------------------------------------------------------------------------…
Strigamia maritima	JH430756.g1245.t1	---------------------------------------------------------------------------------------------------------------------------------------------------------------------------------------------------------------------------------------------------------------------------------------------------------------------------------------------------------------------------------------------------------------…
Strigamia maritima	JH429629.g1702.t1	---------------------------------------------------------------------------------------------------------------------------------------------------------------------------------------------------------------------------------------------------------------------------------------------------------------------------------------------------------------------------------------------------------------…
Strigamia maritima	JH429666.g3936.t1	---------------------------------------------------------------------------------------------------------------------------------------------------------------------------------------------------------------------------------------------------------------------------------------------------------------------------------------------------------------------------------------------------------------…
Strigamia maritima	AFFK01014490.g1415.t1	---------------------------------------------------------------------------------------------------------------------------------------------------------------------------------------------------------------------------------------------------------------------------------------------------------------------------------------------------------------------------------------------------------------…
Strigamia maritima	AFFK01012714.g1275.t1	---------------------------------------------------------------------------------------------------------------------------------------------------------------------------------------------------------------------------------------------------------------------------------------------------------------------------------------------------------------------------------------------------------------…
Strigamia maritima	JH431154.g3751.t1	---------------------------------------------------------------------------------------------------------------------------------------------------------------------------------------------------------------------------------------------------------------------------------------------------------------------------------------------------------------------------------------------------------------…
Strigamia maritima	AFFK01015414.g4206.t1	---------------------------------------------------------------------------------------------------------------------------------------------------------------------------------------------------------------------------------------------------------------------------------------------------------------------------------------------------------------------------------------------------------------…
Strigamia maritima	JH430040.g3913.t1	---------------------------------------------------------------------------------------------------------------------------------------------------------------------------------------------------------------------------------------------------------------------------------------------------------------------------------------------------------------------------------------------------------------…
Strigamia maritima	AFFK01019371.g2072.t1	---------------------------------------------------------------------------------------------------------------------------------------------------------------------------------------------------------------------------------------------------------------------------------------------------------------------------------------------------------------------------------------------------------------…
Strigamia maritima	JH430880.g3220.t1	---------------------------------------------------------------------------------------------------------------------------------------------------------------------------------------------------------------------------------------------------------------------------------------------------------------------------------------------------------------------------------------------------------------…
Strigamia maritima	AFFK01019808.g3524.t1	---------------------------------------------------------------------------------------------------------------------------------------------------------------------------------------------------------------------------------------------------------------------------------------------------------------------------------------------------------------------------------------------------------------…
Strigamia maritima	JH431304.g4523.t1	---------------------------------------------------------------------------------------------------------------------------------------------------------------------------------------------------------------------------------------------------------------------------------------------------------------------------------------------------------------------------------------------------------------…
Strigamia maritima	SMAR000687|m.879 SMAR000687|g.879 type:complete len:109 gc:universal SMAR000687:3745-4071(+)	---------------------------------------------------------------------------------------------------------------------------------------------------------------------------------------------------------------------------------------------------------------------------------------------------------------------------------------------------------------------------------------------------------------…
Strigamia maritima	SMAR000923|m.777 SMAR000923|g.777 type:5prime_partial len:515 gc:universal SMAR000923:2-1546(+)	---------------------------------------------------------------------------------------------------------------------------------------------------------------------------------------------------------------------------------------------------------------------------------------------------------------------------------------------------------------------------------------------------------------…
Strigamia maritima	AFFK01014470.g1904.t1	---------------------------------------------------------------------------------------------------------------------------------------------------------------------------------------------------------------------------------------------------------------------------------------------------------------------------------------------------------------------------------------------------------------…
Strigamia maritima	AFFK01005559.g78.t1	---------------------------------------------------------------------------------------------------------------------------------------------------------------------------------------------------------------------------------------------------------------------------------------------------------------------------------------------------------------------------------------------------------------…
Strigamia maritima	JH430412.g3797.t1	---------------------------------------------------------------------------------------------------------------------------------------------------------------------------------------------------------------------------------------------------------------------------------------------------------------------------------------------------------------------------------------------------------------…
Strigamia maritima	AFFK01008178.g295.t1	---------------------------------------------------------------------------------------------------------------------------------------------------------------------------------------------------------------------------------------------------------------------------------------------------------------------------------------------------------------------------------------------------------------…
Strigamia maritima	JH430634.g2135.t1	---------------------------------------------------------------------------------------------------------------------------------------------------------------------------------------------------------------------------------------------------------------------------------------------------------------------------------------------------------------------------------------------------------------…
Strigamia maritima	SMAR004093|m.281 SMAR004093|g.281 type:complete len:260 gc:universal SMAR004093:844-1623(+)	---------------------------------------------------------------------------------------------------------------------------------------------------------------------------------------------------------------------------------------------------------------------------------------------------------------------------------------------------------------------------------------------------------------…
Strigamia maritima	SMAR000687|m.880 SMAR000687|g.880 type:complete len:102 gc:universal SMAR000687:4037-4342(+)	---------------------------------------------------------------------------------------------------------------------------------------------------------------------------------------------------------------------------------------------------------------------------------------------------------------------------------------------------------------------------------------------------------------…
Strigamia maritima	SMAR006117|m.21 SMAR006117|g.21 type:complete len:171 gc:universal SMAR006117:9621-10133(+)	---------------------------------------------------------------------------------------------------------------------------------------------------------------------------------------------------------------------------------------------------------------------------------------------------------------------------------------------------------------------------------------------------------------…
Strigamia maritima	SMAR002614|m.358 SMAR002614|g.358 type:complete len:251 gc:universal SMAR002614:8273-9025(+)	---------------------------------------------------------------------------------------------------------------------------------------------------------------------------------------------------------------------------------------------------------------------------------------------------------------------------------------------------------------------------------------------------------------…
Strigamia maritima	SMAR015221|m.843 SMAR015221|g.843 type:complete len:393 gc:universal SMAR015221:6163-7341(+)	---------------------------------------------------------------------------------------------------------------------------------------------------------------------------------------------------------------------------------------------------------------------------------------------------------------------------------------------------------------------------------------------------------------…
Strigamia maritima	SMAR001462|m.331 SMAR001462|g.331 type:complete len:309 gc:universal SMAR001462:7916-8842(+)	---------------------------------------------------------------------------------------------------------------------------------------------------------------------------------------------------------------------------------------------------------------------------------------------------------------------------------------------------------------------------------------------------------------…
Strigamia maritima	SMAR001027|m.75 SMAR001027|g.75 type:complete len:131 gc:universal SMAR001027:2054-2446(+)	---------------------------------------------------------------------------------------------------------------------------------------------------------------------------------------------------------------------------------------------------------------------------------------------------------------------------------------------------------------------------------------------------------------…
Strigamia maritima	SMAR015343|m.187 SMAR015343|g.187 type:complete len:211 gc:universal SMAR015343:24813-25445(+)	---------------------------------------------------------------------------------------------------------------------------------------------------------------------------------------------------------------------------------------------------------------------------------------------------------------------------------------------------------------------------------------------------------------…
Strigamia maritima	JH429553.g2459.t1	---------------------------------------------------------------------------------------------------------------------------------------------------------------------------------------------------------------------------------------------------------------------------------------------------------------------------------------------------------------------------------------------------------------…
Strigamia maritima	JH431490.g3191.t1	---------------------------------------------------------------------------------------------------------------------------------------------------------------------------------------------------------------------------------------------------------------------------------------------------------------------------------------------------------------------------------------------------------------…
Strigamia maritima	JH430186.g2738.t1	---------------------------------------------------------------------------------------------------------------------------------------------------------------------------------------------------------------------------------------------------------------------------------------------------------------------------------------------------------------------------------------------------------------…
Strigamia maritima	AFFK01009215.g600.t1	---------------------------------------------------------------------------------------------------------------------------------------------------------------------------------------------------------------------------------------------------------------------------------------------------------------------------------------------------------------------------------------------------------------…
Strigamia maritima	AFFK01023718.g2581.t1	---------------------------------------------------------------------------------------------------------------------------------------------------------------------------------------------------------------------------------------------------------------------------------------------------------------------------------------------------------------------------------------------------------------…
Strigamia maritima	JH431698.g4110.t1	---------------------------------------------------------------------------------------------------------------------------------------------------------------------------------------------------------------------------------------------------------------------------------------------------------------------------------------------------------------------------------------------------------------…
Strigamia maritima	JH431635.g5225.t1	---------------------------------------------------------------------------------------------------------------------------------------------------------------------------------------------------------------------------------------------------------------------------------------------------------------------------------------------------------------------------------------------------------------…
Strigamia maritima	JH431971.g7281.t1	---------------------------------------------------------------------------------------------------------------------------------------------------------------------------------------------------------------------------------------------------------------------------------------------------------------------------------------------------------------------------------------------------------------…
Strigamia maritima	JH431973.g6995.t1	---------------------------------------------------------------------------------------------------------------------------------------------------------------------------------------------------------------------------------------------------------------------------------------------------------------------------------------------------------------------------------------------------------------…
Strigamia maritima	AFFK01018520.g3019.t1	---------------------------------------------------------------------------------------------------------------------------------------------------------------------------------------------------------------------------------------------------------------------------------------------------------------------------------------------------------------------------------------------------------------…
Strigamia maritima	JH431451.g5568.t1	---------------------------------------------------------------------------------------------------------------------------------------------------------------------------------------------------------------------------------------------------------------------------------------------------------------------------------------------------------------------------------------------------------------…
Strigamia maritima	JH431932.g6184.t1	---------------------------------------------------------------------------------------------------------------------------------------------------------------------------------------------------------------------------------------------------------------------------------------------------------------------------------------------------------------------------------------------------------------…
Strigamia maritima	JH430053.g1593.t1	---------------------------------------------------------------------------------------------------------------------------------------------------------------------------------------------------------------------------------------------------------------------------------------------------------------------------------------------------------------------------------------------------------------…
Strigamia maritima	JH431742.g6075.t1	---------------------------------------------------------------------------------------------------------------------------------------------------------------------------------------------------------------------------------------------------------------------------------------------------------------------------------------------------------------------------------------------------------------…
Strigamia maritima	AFFK01014969.g2651.t1	---------------------------------------------------------------------------------------------------------------------------------------------------------------------------------------------------------------------------------------------------------------------------------------------------------------------------------------------------------------------------------------------------------------…
Strigamia maritima	JH430056.g3642.t1	---------------------------------------------------------------------------------------------------------------------------------------------------------------------------------------------------------------------------------------------------------------------------------------------------------------------------------------------------------------------------------------------------------------…
Strigamia maritima	JH431497.g4360.t1	---------------------------------------------------------------------------------------------------------------------------------------------------------------------------------------------------------------------------------------------------------------------------------------------------------------------------------------------------------------------------------------------------------------…
Strigamia maritima	JH430874.g1727.t1	---------------------------------------------------------------------------------------------------------------------------------------------------------------------------------------------------------------------------------------------------------------------------------------------------------------------------------------------------------------------------------------------------------------…
Strigamia maritima	JH431698.g4109.t1	---------------------------------------------------------------------------------------------------------------------------------------------------------------------------------------------------------------------------------------------------------------------------------------------------------------------------------------------------------------------------------------------------------------…
Strigamia maritima	JH429884.g1769.t1	---------------------------------------------------------------------------------------------------------------------------------------------------------------------------------------------------------------------------------------------------------------------------------------------------------------------------------------------------------------------------------------------------------------…
Strigamia maritima	JH430392.g3551.t1	---------------------------------------------------------------------------------------------------------------------------------------------------------------------------------------------------------------------------------------------------------------------------------------------------------------------------------------------------------------------------------------------------------------…
Strigamia maritima	JH431788.g4138.t1	---------------------------------------------------------------------------------------------------------------------------------------------------------------------------------------------------------------------------------------------------------------------------------------------------------------------------------------------------------------------------------------------------------------…
Strigamia maritima	JH430759.g4970.t1	---------------------------------------------------------------------------------------------------------------------------------------------------------------------------------------------------------------------------------------------------------------------------------------------------------------------------------------------------------------------------------------------------------------…
Strigamia maritima	JH431007.g4488.t1	---------------------------------------------------------------------------------------------------------------------------------------------------------------------------------------------------------------------------------------------------------------------------------------------------------------------------------------------------------------------------------------------------------------…
Strigamia maritima	JH432101.g4884.t1	---------------------------------------------------------------------------------------------------------------------------------------------------------------------------------------------------------------------------------------------------------------------------------------------------------------------------------------------------------------------------------------------------------------…
Strigamia maritima	JH430634.g2136.t1	---------------------------------------------------------------------------------------------------------------------------------------------------------------------------------------------------------------------------------------------------------------------------------------------------------------------------------------------------------------------------------------------------------------…
Strigamia maritima	JH431830.g6918.t1	---------------------------------------------------------------------------------------------------------------------------------------------------------------------------------------------------------------------------------------------------------------------------------------------------------------------------------------------------------------------------------------------------------------…
Strigamia maritima	AFFK01017357.g1006.t1	---------------------------------------------------------------------------------------------------------------------------------------------------------------------------------------------------------------------------------------------------------------------------------------------------------------------------------------------------------------------------------------------------------------…
Strigamia maritima	JH431497.g4359.t1	---------------------------------------------------------------------------------------------------------------------------------------------------------------------------------------------------------------------------------------------------------------------------------------------------------------------------------------------------------------------------------------------------------------…
Strigamia maritima	JH430874.g1726.t1	---------------------------------------------------------------------------------------------------------------------------------------------------------------------------------------------------------------------------------------------------------------------------------------------------------------------------------------------------------------------------------------------------------------…
Strigamia maritima	JH431788.g4139.t1	---------------------------------------------------------------------------------------------------------------------------------------------------------------------------------------------------------------------------------------------------------------------------------------------------------------------------------------------------------------------------------------------------------------…
Strigamia maritima	JH430759.g4971.t1	---------------------------------------------------------------------------------------------------------------------------------------------------------------------------------------------------------------------------------------------------------------------------------------------------------------------------------------------------------------------------------------------------------------…
Strigamia maritima	JH430552.g2798.t1	---------------------------------------------------------------------------------------------------------------------------------------------------------------------------------------------------------------------------------------------------------------------------------------------------------------------------------------------------------------------------------------------------------------…
Strigamia maritima	JH431830.g6919.t1	---------------------------------------------------------------------------------------------------------------------------------------------------------------------------------------------------------------------------------------------------------------------------------------------------------------------------------------------------------------------------------------------------------------…
Strigamia maritima	JH432101.g4885.t1	---------------------------------------------------------------------------------------------------------------------------------------------------------------------------------------------------------------------------------------------------------------------------------------------------------------------------------------------------------------------------------------------------------------…
Daphnia pulex	Copia-23_DPu#LTR/Copia 95-4262 via tfasty with Copia15-NVi, 1 frameshift. [Daphnia pulex]	--------------------------------------------------------------------------------------------------------------------------------------------------------------------------------MA----------------------TGT----------------------------------------------------------------------------------------------------------------------------------------------------------------------------------------------------…
Daphnia pulex	Copia-24_DPu#LTR/Copia 96-3464 Fragment (N term missing) [Daphnia pulex]	---------------------------------------------------------------------------------------------------------------------------------------------------------------------------------------------------------------------------------------------------------------------------------------------------------------------------------------------------------------------------------------------------------------…
Strigamia maritima	JH431351.g4567.t1	---------------------------------------------------------------------------------------------------------------------------------------------------------------------------------------------------------------------------------------------------------------------------------------------------------------------------------------------------------------------------------------------------------------…
Aedes aegypti	Copia-4_AA#LTR/Copia 208-4137 via tfasty with Copia-29_CQ, 82.7% SW:4311, 2 frameshifts. [Aedes aegypti]	--------------------------------------------------------------------------------------------------------------------------------------------------------------------------------ME----------------------DDRA------------------------------------------------------------------------------------------------------------------------------------------------------------------------------P--------------------…
Aedes aegypti	Copia-7_AA#LTR/Copia 74-4197 via tfasty with Copia-106_AA, 89.1% SW:5257, 1 frameshift. [Aedes aegypti]	--------------------------------------------------------------------------------------------------------------------------------------------------------------------------------MS----------------------DEKL-------------------------------------------------------W-------------------------------------------------------------------------------------------------------------------------------------------…
Aedes aegypti	Copia-106_AA#LTR/Copia 43-4194 via tfasty with Copia-29_CQ, 3 frameshifts. [Aedes aegypti]	--------------------------------------------------------------------------------------------------------------------------------------------------------------------------------MS----------------------EEKL-------------------------------------------------------W-------------------------------------------------------------------------------------------------------------------------------------------…
Aedes aegypti	Copia-14_AA#LTR/Copia 77-4159 [Aedes aegypti]	--------------------------------------------------------------------------------------------------------------------------------------------------------------------------------ME----------------------DEK----------------------------------------------------------------------------------------------------------------------------------------------------------------------------------------------------…
Aedes aegypti	Copia-6_AA#LTR/Copia 100-4128 [Aedes aegypti]	--------------------------------------------------------------------------------------------------------------------------------------------------------------------------------ME----------------------DSGKEE-------------------------------------------------------------------------------------------------------------------------------------------------------------------------------------------------…
Aedes aegypti	Copia-15_AA#LTR/Copia 83-4121 via tfasty with Copia-108_AA, 4 frameshifts. [Aedes aegypti]	--------------------------------------------------------------------------------------------------------------------------------------------------------------------------------ME----------------------RESEL--------------------------------------------------------------------------------------------------------------------------------------------------------------------------------------------------…
Aedes aegypti	Copia-108_AA#LTR/Copia 77-4083 [Aedes aegypti]	--------------------------------------------------------------------------------------------------------------------------------------------------------------------------------ME----------------------KDSDA--------------------------------------------------------------------------------------------------------------------------------------------------------------------------------------------------…
Aedes aegypti	Copia-122_AA#LTR/Copia 47-4085 via tfasty with Copia-108_AA, 2 frameshifts and 1 stopcodon. [Aedes aegypti]	--------------------------------------------------------------------------------------------------------------------------------------------------------------------------------ME----------------------KEDF---------------------------------------------------------------------------------------------------------------------------------------------------------------------------------------------------…
Aedes aegypti	Copia-124_AA#LTR/Copia 65-4134 via tfasty with Copia-108_AA, 5 frameshifts. [Aedes aegypti]	--------------------------------------------------------------------------------------------------------------------------------------------------------------------------------MD----------------------REGE---------------------------------------------------------------------------------------------------------------------------------------------------------------------------------------------------…
Aedes aegypti	Copia-105_AA#LTR/Copia 69-4061 [Aedes aegypti]	--------------------------------------------------------------------------------------------------------------------------------------------------------------------------------ME----------------------EEKFD--------------------------------------------------------------------------------------------------------------------------------------------------------------------------------------------------…
Aedes aegypti	Copia-132_AA#LTR/Copia 61-3582 C. 180 AA internal deletion near C terminus [Aedes aegypti]	--------------------------------------------------------------------------------------------------------------------------------------------------------------------------------ME----------------------EEKAE--------------------------------------------------------------------------------------------------------------------------------------------------------------------------------------------------…
Strigamia maritima	AFFK01005501.g651.t1	---------------------------------------------------------------------------------------------------------------------------------------------------------------------------------------------------------------------------------------------------------------------------------------------------------------------------------------------------------------------------------------------------------------…
Strigamia maritima	AFFK01014784.g1305.t1	--------------------------------------------------------------------------------------------------------------------------------------------------------------------------------MD-----------------------------------------------------------------------------------------------------------------------------------------------------------------------------------------------------------------------------…
Strigamia maritima	JH431921.g1915.t1	---------------------------------------------------------------------------------------------------------------------------------------------------------------------------------------------------------------------------------------------------------------------------------------------------------------------------------------------------------------------------------------------------------------…
Strigamia maritima	JH431925.g3225.t1	---------------------------------------------------------------------------------------------------------------------------------------------------------------------------------------------------------------------------------------------------------------------------------------------------------------------------------------------------------------------------------------------------------------…
Strigamia maritima	JH430073.g3415.t1	---------------------------------------------------------------------------------------------------------------------------------------------------------------------------------------------------------------------------------------------------------------------------------------------------------------------------------------------------------------------------------------------------------------…
Drosophila willistoni	Copia-8_DWil#LTR/Copia 57-3926 71.9% sim to Copia-113_AA, SW:2478, [Drosophila willistoni]	--------------------------------------------------------------------------------------------------------------------------------------------------------------------------------MT----------------------N------------------------------------------------------------------------------------------------------------------------------------------------------------------------------------------------------…
Aedes aegypti	Copia-13_AA#LTR/Copia 95-4141 via tfasty with Copia-113_AA, 82.9% SW:4117, 1 stopcodon. [Aedes aegypti]	--------------------------------------------------------------------------------------------------------------------------------------------------------------------------------MSL-----------------NHLNNGSGEN-------------------------------------------GRTAAEAISV--------------------------------------------------------------------------------------------------------------------------------------------…
Aedes aegypti	Copia-104_AA#LTR/Copia 87-4139 via tfasty with Copia-137_AA, 5 frameshifts and 1 stopcodon. [Aedes aegypti]	--------------------------------------------------------------------------------------------------------------------------------------------------------------------------------MI----------------PRD-VDQQQNSSSRTN-----------------------------TTRGGVAAGSGDGVRAGGVV--------------------------------------------------------------------------------------------------------------------------------------------…
Aedes aegypti	Copia-129_AA#LTR/Copia 78-4082 [Aedes aegypti]	--------------------------------------------------------------------------------------------------------------------------------------------------------------------------------MVL---------------PRD-DPNSQGGGRSTGGGT------------------------AGTGQGDGATTSGGSVRPAAPV--------------------------------------------------------------------------------------------------------------------------------------------…
Aedes aegypti	Copia-137_AA#LTR/Copia 72-4085 [Aedes aegypti]	--------------------------------------------------------------------------------------------------------------------------------------------------------------------------------MI----------------PRDNSSSTSQSGGMTGGNS------------------------RQIAGGDGSTASGSGVRSTATV--------------------------------------------------------------------------------------------------------------------------------------------…
Aedes aegypti	Copia-113_AA#LTR/Copia 90-4136 [Aedes aegypti]	--------------------------------------------------------------------------------------------------------------------------------------------------------------------------------MT----------------NGQQV-NGSGAGSQGTG-----------------------------SGGLPAAGGGAGVPAA-----------------------------------------------------------------------------------------------------------------------------------------------…
Strigamia maritima	AFFK01020289.g2343.t1	---------------------------------------------------------------------------------------------------------------------------------------------------------------------------------------------------------------------------------------------------------------------------------------------------------------------------------------------------------------------------------------------------------------…
Strigamia maritima	JH431934.g5065.t1	---------------------------------------------------------------------------------------------------------------------------------------------------------------------------------------------------------------------------------------------------------------------------------------------------------------------------------------------------------------------------------------------------------------…
Strigamia maritima	AFFK01019641.g2744.t1	--------------------------------------------------------------------------------------------------------------------------------------------------------------------------------M------------------------------------------------------------------------------------------------------------------------------------------------------------------------------------------------------------------------------…
Strigamia maritima	AFFK01014259.g2579.t1	---------------------------------------------------------------------------------------------------------------------------------------------------------------------------------------------------------------------------------------------------------------------------------------------------------------------------------------------------------------------------------------------------------------…
Strigamia maritima	JH429756.g4161.t1	---------------------------------------------------------------------------------------------------------------------------------------------------------------------------------------------------------------------------------------------------------------------------------------------------------------------------------------------------------------------------------------------------------------…
Strigamia maritima	JH431934.g5064.t1	--------------------------------------------------------------------------------------------------------------------------------------------------------------------------------MK-----------------------------------------------------------------------------------------------------------------------------------------------------------------------------------------------------------------------------…
Strigamia maritima	JH431641.g5102.t1	--------------------------------------------------------------------------------------------------------------------------------------------------------------------------------MM-----------------------------------------------------------------------------------------------------------------------------------------------------------------------------------------------------------------------------…
Aedes aegypti	Copia-126_AA#LTR/Copia 76-4266 [Aedes aegypti]	--------------------------------------------------------------------------------------------------------------------------------------------------------------------------------MN---------------------------------------------------------------------------------G-------------------------------------------------------------------------------------------------------------------------------------------…
Aedes aegypti	Copia-134_AA#LTR/Copia 78-4279 via tfasty with Copia-38_CQ, 1 frameshift. [Aedes aegypti]	--------------------------------------------------------------------------------------------------------------------------------------------------------------------------------MAN--------------------PNAGSSAS------------------------------------------GDGVLVRQQQ--------------------------------------------------------------------------------------------------------------------------------------------…
Culex quinquefasciatus	Copia-38_CQ#LTR/Copia 113-4330 [Culex quinquefasciatus]	--------------------------------------------------------------------------------------------------------------------------------------------------------------------------------MPN--------------------GDGSGAGA------------------------------------------QGAVQPEARG--------------------------------------------------------------------------------------------------------------------------------------------…
Culex quinquefasciatus	Copia-14_CQ#LTR/Copia 80-4173 via tfasty with Copia-6_AG, 3 frameshifts and 3 stopcodons. [Culex quinquefasciatus]	--------------------------------------------------------------------------------------------------------------------------------------------------------------------------------MS----------------------TGGDGADAPG---------------------------------------------------------------------------------------------------------------------------------------------------------------------------------------R-----…
Aedes aegypti	Copia-110_AA#LTR/Copia 86-4225 via tfasty with Copia-36_CQ, 8 frameshifts. [Aedes aegypti]	--------------------------------------------------------------------------------------------------------------------------------------------------------------------------------MAR----------------XGGGXSAXRRDAVXG---------------------------------------------------------------------------------------------------------------------------------------------------------------------------------------R-----…
Culex quinquefasciatus	Copia-12_CQ#LTR/Copia 80-4226 after removal of an 890 bp tandem duplication [Culex quinquefasciatus]	MV------------------------------------------------------------------------------------------------------------------------------------------------------------------------------LP----------------------NASGSGD--------------------------------------------GAQTNPPG--------------------------------------------------------------------------------------------------------------------------------------------…
Strigamia maritima	AFFK01020406.g1721.t1	---------------------------------------------------------------------------------------------------------------------------------------------------------------------------------------------------------------------------------------------------------------------------------------------------------------------------------------------------------------------------------------------------------------…
Bombyx mori	Copia-1_BM#LTR/Copia 159-4034 [Bombyx mori]	--------------------------------------------------------------------------------------------------------------------------------------------------------------------------------MG----------------------PNM----------------------------------------------------------------------------------------------------------------------------------------------------------------------------------------------------…
Bombyx mori	Copia-2_BM#LTR/Copia 157-3974 via tfasty with Copia-1_BM, 1 frameshift and 1 stopcodon. [Bombyx mori]	--------------------------------------------------------------------------------------------------------------------------------------------------------------------------------MN----------------------NQMA---------------------------------------------------------------------------------------------------------------------------------------------------------------------------------------------------…
Bombyx mori	Bmor_BGIBMGA011035	--------------------------------------------------------------------------------------------------------------------------------------------------------------------------------MN----------------------NQMA---------------------------------------------------------------------------------------------------------------------------------------------------------------------------------------------------…
Strigamia maritima	AFFK01013306.g1595.t1	---------------------------------------------------------------------------------------------------------------------------------------------------------------------------------------------------------------------------------------------------------------------------------------------------------------------------------------------------------------------------------------------------------------…
Strigamia maritima	AFFK01019778.g3198.t1	---------------------------------------------------------------------------------------------------------------------------------------------------------------------------------------------------------------------------------------------------------------------------------------------------------------------------------------------------------------------------------------------------------------…
Strigamia maritima	AFFK01019071.g5364.t1	---------------------------------------------------------------------------------------------------------------------------------------------------------------------------------------------------------------------------------------------------------------------------------------------------------------------------------------------------------------------------------------------------------------…
Strigamia maritima	JH431781.g7235.t1	---------------------------------------------------------------------------------------------------------------------------------------------------------------------------------------------------------------------------------------------------------------------------------------------------------------------------------------------------------------------------------------------------------------…
Strigamia maritima	AFFK01020392.g4011.t1	---------------------------------------------------------------------------------------------------------------------------------------------------------------------------------------------------------------------------------------------------------------------------------------------------------------------------------------------------------------------------------------------------------------…
Centruroides sculpturatus	Scorpion_Gene.287::hit_15::g.287::m.287 type:complete len:919 gc:universal hit_15:683-3439(+)	--------------------------------------------------------------------------------------------------------------------------------------------------------------------------------MI-----------------------------------------------------------------------------------------------------------------------------------------------------------------------------------------------------------------------------…
Centruroides sculpturatus	Scorpion_Gene.1493::hit_82::g.1493::m.1493 type:complete len:996 gc:universal hit_82:6270-9257(+)	--------------------------------------------------------------------------------------------------------------------------------------------------------------------------------MY-----------------------------------------------------------------------------------------------------------------------------------------------------------------------------------------------------------------------------…
Trigoniulus corallinus	Millipede_Gene.29::scaffold160970::g.29::m.29 type:complete len:79 gc:universal scaffold160970:4246-4010(-)	---------------------------------------------------------------------------------------------------------------------------------------------------------------------------------------------------------------------------------------------------------------------------------------------------------------------------------------------------------------------------------------------------------------…
Trigoniulus corallinus	Millipede_Gene.38::scaffold192706::g.38::m.38 type:complete len:118 gc:universal scaffold192706:1054-701(-)	---------------------------------------------------------------------------------------------------------------------------------------------------------------------------------------------------------------------------------------------------------------------------------------------------------------------------------------------------------------------------------------------------------------…
Strigamia maritima	SMAR001539|m.649 SMAR001539|g.649 type:complete len:312 gc:universal SMAR001539:6032-6967(+)	---------------------------------------------------------------------------------------------------------------------------------------------------------------------------------------------------------------------------------------------------------------------------------------------------------------------------------------------------------------------------------------------------------------…
Strigamia maritima	JH431055.g2252.t1	---------------------------------------------------------------------------------------------------------------------------------------------------------------------------------------------------------------------------------------------------------------------------------------------------------------------------------------------------------------------------------------------------------------…
Strigamia maritima	AFFK01012760.g3348.t1	---------------------------------------------------------------------------------------------------------------------------------------------------------------------------------------------------------------------------------------------------------------------------------------------------------------------------------------------------------------------------------------------------------------…
Strigamia maritima	SMAR001539|m.650 SMAR001539|g.650 type:5prime_partial len:192 gc:universal SMAR001539:2-577(+)	---------------------------------------------------------------------------------------------------------------------------------------------------------------------------------------------------------------------------------------------------------------------------------------------------------------------------------------------------------------------------------------------------------------…
Strigamia maritima	AFFK01012979.g1544.t1	---------------------------------------------------------------------------------------------------------------------------------------------------------------------------------------------------------------------------------------------------------------------------------------------------------------------------------------------------------------------------------------------------------------…
Strigamia maritima	JH430083.g3362.t1	---------------------------------------------------------------------------------------------------------------------------------------------------------------------------------------------------------------------------------------------------------------------------------------------------------------------------------------------------------------------------------------------------------------…
Strigamia maritima	JH430924.g2412.t1	---------------------------------------------------------------------------------------------------------------------------------------------------------------------------------------------------------------------------------------------------------------------------------------------------------------------------------------------------------------------------------------------------------------…
Strigamia maritima	JH431705.g2869.t1	---------------------------------------------------------------------------------------------------------------------------------------------------------------------------------------------------------------------------------------------------------------------------------------------------------------------------------------------------------------------------------------------------------------…
Strigamia maritima	AFFK01013512.g3565.t1	---------------------------------------------------------------------------------------------------------------------------------------------------------------------------------------------------------------------------------------------------------------------------------------------------------------------------------------------------------------------------------------------------------------…
Strigamia maritima	JH431510.g4300.t1	---------------------------------------------------------------------------------------------------------------------------------------------------------------------------------------------------------------------------------------------------------------------------------------------------------------------------------------------------------------------------------------------------------------…
Strigamia maritima	AFFK01014587.g1599.t1	---------------------------------------------------------------------------------------------------------------------------------------------------------------------------------------------------------------------------------------------------------------------------------------------------------------------------------------------------------------------------------------------------------------…
Stegodyphus mimosarum	Smal_Gene.1509::hit_54::g.1509::m.1509 type:complete len:510 gc:universal hit_54:8726-10255(+)	---------------------------------------------------------------------------------------------------------------------------------------------------------------------------------------------------------------------------------------------------------------------------------------------------------------------------------------------------------------------------------------------------------------…
Stegodyphus mimosarum	Smal_Gene.1487::hit_53::g.1487::m.1487 type:complete len:827 gc:universal hit_53:6299-8779(+)	---------------------------------------------------------------------------------------------------------------------------------------------------------------------------------------------------------------------------------------------------------------------------------------------------------------------------------------------------------------------------------------------------------------…
Stegodyphus mimosarum	Smal_Gene.10933::hit_397::g.10933::m.10933 type:complete len:1538 gc:universal hit_397:3416-8029(+)	--------------------------------------------------------------------------------------------------------------------------------------------------------------------------------MC-----------------------------------------------------------------------------------------------------------------------------------------------------------------------------------------------------------------------------…
Stegodyphus mimosarum	Smal_Gene.2895::hit_105::g.2895::m.2895 type:complete len:753 gc:universal hit_105:8261-10519(+)	---------------------------------------------------------------------------------------------------------------------------------------------------------------------------------------------------------------------------------------------------------------------------------------------------------------------------------------------------------------------------------------------------------------…
Stegodyphus mimosarum	Smal_Gene.6618::hit_237::g.6618::m.6618 type:complete len:1168 gc:universal hit_237:4598-8101(+)	---------------------------------------------------------------------------------------------------------------------------------------------------------------------------------------------------------------------------------------------------------------------------------------------------------------------------------------------------------------------------------------------------------------…
Stegodyphus mimosarum	Smal_Gene.4031::hit_147::g.4031::m.4031 type:complete len:1462 gc:universal hit_147:6934-11319(+)	---------------------------------------------------------------------------------------------------------------------------------------------------------------------------------------------------------------------------------------------------------------------------------------------------------------------------------------------------------------------------------------------------------------…
Stegodyphus mimosarum	Smal_KFM74814 pep supercontig:Stegodyphus_mimosarum_v1:KK119120:21132:33113:-1 gene:X975_10623 transcript:KFM74814 gene_biotype:protein_coding transcript_biotype:protein_coding description:Copia protein [Source:INSDC protein ID;Acc:KFM74814.1]	---------------------------------------------------------------------------------------------------------------------------------------------------------------------------------------------------------------------------------------------------------------------------------------------------------------------------------------------------------------------------------------------------------------…
Stegodyphus mimosarum	Smal_Gene.7189::hit_257::g.7189::m.7189 type:complete len:1024 gc:universal hit_257:2475-5546(+)	--------------------------------------------------------------------------------------------------------------------------------------------------------------------------------MGSFLALKRDLMILSSPKSINSICSSAGASDIS----------------------------------------------------------------------------------------------------------------------------------------------------------------------------------------------…
Stegodyphus mimosarum	Smal_Gene.4706::hit_169::g.4706::m.4706 type:complete len:760 gc:universal hit_169:8090-10369(+)	---------------------------------------------------------------------------------------------------------------------------------------------------------------------------------------------------------------------------------------------------------------------------------------------------------------------------------------------------------------------------------------------------------------…
Stegodyphus mimosarum	Smal_Gene.7016::hit_250::g.7016::m.7016 type:complete len:981 gc:universal hit_250:8090-11032(+)	---------------------------------------------------------------------------------------------------------------------------------------------------------------------------------------------------------------------------------------------------------------------------------------------------------------------------------------------------------------------------------------------------------------…
Stegodyphus mimosarum	Smal_Gene.6377::hit_229::g.6377::m.6377 type:complete len:354 gc:universal hit_229:6371-7432(+)	---------------------------------------------------------------------------------------------------------------------------------------------------------------------------------------------------------------------------------------------------------------------------------------------------------------------------------------------------------------------------------------------------------------…
Stegodyphus mimosarum	Smal_Gene.4817::hit_173::g.4817::m.4817 type:complete len:302 gc:universal hit_173:7706-8611(+)	---------------------------------------------------------------------------------------------------------------------------------------------------------------------------------------------------------------------------------------------------------------------------------------------------------------------------------------------------------------------------------------------------------------…
Stegodyphus mimosarum	Smal_Gene.4061::hit_148::g.4061::m.4061 type:complete len:218 gc:universal hit_148:3913-4566(+)	---------------------------------------------------------------------------------------------------------------------------------------------------------------------------------------------------------------------------------------------------------------------------------------------------------------------------------------------------------------------------------------------------------------…
Stegodyphus mimosarum	Smal_Gene.11324::hit_411::g.11324::m.11324 type:complete len:780 gc:universal hit_411:7001-9340(+)	---------------------------------------------------------------------------------------------------------------------------------------------------------------------------------------------------------------------------------------------------------------------------------------------------------------------------------------------------------------------------------------------------------------…
Stegodyphus mimosarum	Smal_Gene.2234::hit_81::g.2234::m.2234 type:complete len:224 gc:universal hit_81:6441-7112(+)	---------------------------------------------------------------------------------------------------------------------------------------------------------------------------------------------------------------------------------------------------------------------------------------------------------------------------------------------------------------------------------------------------------------…
Arabidopsis	ATCopia44#LTR/Copia 59-4105 Wised via estwise with ATCopia10 protein [Arabidopsis]	--------------------------------------------------------------------------------------------------------------------------------------------------------------------------------MA----------------------MSSK---------------------------------------------------------------------------------------------------------------------------------------------------------------------------------------------------…
Eutrema parvulum	Copia-2_EPa#LTR/Copia 117-4185 via tfasty with ATCopia37, 78.9% SW:3623, 4 frameshifts and 4 stopcodons. [Eutrema parvulum]	--------------------------------------------------------------------------------------------------------------------------------------------------------------------------------ME-----------------------------------------------------------------------------------------------------------------------------------------------------------------------------------------------------------------------------…
Brassica rapa	Copia-94_BRa#LTR/Copia 123-4029 via tfasty with Copia-96_BRa, 80.2% SW:4242, 4 frameshifts. [Brassica rapa]	--------------------------------------------------------------------------------------------------------------------------------------------------------------------------------ME-----------------------------------------------------------------------------------------------------------------------------------------------------------------------------------------------------------------------------…
Brassica rapa	Copia-96_BRa#LTR/Copia 123-4202 [Brassica rapa]	--------------------------------------------------------------------------------------------------------------------------------------------------------------------------------MK-----------------------------------------------------------------------------------------------------------------------------------------------------------------------------------------------------------------------------…
Brassica rapa	Copia-91_BRa#LTR/Copia 196-4218 [Brassica rapa]	--------------------------------------------------------------------------------------------------------------------------------------------------------------------------------ME-----------------------------------------------------------------------------------------------------------------------------------------------------------------------------------------------------------------------------…
Oryza sativa	COPI1#LTR/Copia 35-4003 35-4003 [Oryza sativa]	--------------------------------------------------------------------------------------------------------------------------------------------------------------------------------MA-----------------------------------------------------------------------------------------------------------------------------------------------------------------------------------------------------------------------------…
Oryza sativa	COPI2#LTR/Copia 35-4048 [Oryza sativa]	--------------------------------------------------------------------------------------------------------------------------------------------------------------------------------MT----------------------T------------------------------------------------------------------------------------------------------------------------------------------------------------------------------------------------------…
Zea mays	Copia-59_ZM#LTR/Copia 63-4013 via tfasty with Copia3_OS, 88.0% SW:4670, 2 frameshifts. [Zea mays]	--------------------------------------------------------------------------------------------------------------------------------------------------------------------------------MS----------------------T------------------------------------------------------------------------------------------------------------------------------------------------------------------------------------------------------…
Solanum lycopersicum	Copia-2_SL#LTR/Copia 50-3970 [Solanum lycopersicum]	--------------------------------------------------------------------------------------------------------------------------------------------------------------------------------MS----------------------ALN----------------------------------------------------------------------------------------------------------------------------------------------------------------------------------------------------…
Glycine max	Copia-26_GM#LTR/Copia 208-4194 via tfasty with Copia-2_SL, 85.0% SW:4180, 2 stopcodons. [Glycine max]	--------------------------------------------------------------------------------------------------------------------------------------------------------------------------------MS----------------------NT-----------------------------------------------------------------------------------------------------------------------------------------------------------------------------------------------------…
Glycine max	Copia-20_GM#LTR/Copia 17-3903 via tfasty with COP18_MT, 80.4% SW:3736, 1 frameshift and 4 stopcodons. [Glycine max]	--------------------------------------------------------------------------------------------------------------------------------------------------------------------------------MS-----------------------------------------------------------------------------------------------------------------------------------------------------------------------------------------------------------------------------…
Vitis vinifera	Copia-64_VV#LTR/Copia 27-3959 [Vitis vinifera]	--------------------------------------------------------------------------------------------------------------------------------------------------------------------------------MG----------------------TAK----------------------------------------------------------------------------------------------------------------------------------------------------------------------------------------------------…
Glycine max	Copia-41_GM#LTR/Copia 52-3981 via tfasty with COP7_MT, 83.6% SW:4197, 4 stopcodons. [Glycine max]	--------------------------------------------------------------------------------------------------------------------------------------------------------------------------------IA----------------------TK-----------------------------------------------------------------------------------------------------------------------------------------------------------------------------------------------------…
Malus x domestica	Copia-16_Mad#LTR/Copia 36-4046 [Malus x domestica]	--------------------------------------------------------------------------------------------------------------------------------------------------------------------------------ME----------------------GSG----------------------------------------------------------------------------------------------------------------------------------------------------------------------------------------------------…
Medicago truncatula	SHACOP16_MT#LTR/Copia join48-1622 [Medicago truncatula]	--------------------------------------------------------------------------------------------------------------------------------------------------------------------------------ME----------------------ENTG---------------------------------------------------------------------------------------------------------------------------------------------------------------------------------------------------…
Vitis vinifera	Copia-48_VV#LTR/Copia 61-4021 via tfasty with Copia-33_Mad, 88.3% SW:4590, 1 frameshift and 2 stopcodons. [Vitis vinifera]	--------------------------------------------------------------------------------------------------------------------------------------------------------------------------------MD----------------------GNVG---------------------------------------------------------------------------------------------------------------------------------------------------------------------------------------------------…
Nicotiana tabacum	TTO1_NT#LTR/Copia 716-4732 TOTO1_LP near-identical with a large deletion. [Nicotiana tabacum]	--------------------------------------------------------------------------------------------------------------------------------------------------------------------------------ME----------------------ARTS---------------------------------------------------------------------------------------------------------------------------------------------------------------------------------------------------…
Nicotiana tabacum	TNT1#LTR/Copia 73-4068 gi|130582|sp|P10978|POLX_TOBAC [Nicotiana tabacum]	--------------------------------------------------------------------------------------------------------------------------------------------------------------------------------MS-----------------------------------------------------------------------------------------------------------------------------------------------------------------------------------------------------------------------------…
Vitis vinifera	Copia-31_VV#LTR/Copia 40-3936 [Vitis vinifera]	--------------------------------------------------------------------------------------------------------------------------------------------------------------------------------MA----------------------EEAGKA-------------------------------------------------------------------------------------------------------------------------------------------------------------------------------------------------…
Medicago truncatula	SHACOP_MT#LTR/Copia 199-4092 (1 stopcodon) [Medicago truncatula]	--------------------------------------------------------------------------------------------------------------------------------------------------------------------------------MA----------------------ADEGK--------------------------------------------------------------------------------------------------------------------------------------------------------------------------------------------------…
Glycine max	Copia-45_GM#LTR/Copia 95-3994 via tfasty with Copia-31_VV, 86.6% SW:4412, 4 stopcodons. [Glycine max]	--------------------------------------------------------------------------------------------------------------------------------------------------------------------------------MA----------------------LEEGK--------------------------------------------------------------------------------------------------------------------------------------------------------------------------------------------------…
Solenopsis invicta	Copia-25_SI#LTR/Copia 127-4223 via tfasty with Copia1_DM, 67.7% SW:1940, 1 frameshift. [Solenopsis invicta]	--------------------------------------------------------------------------------------------------------------------------------------------------------------------------------MA----------------------T------------------------------------------------------------------------------------------------------------------------------------------------------------------------------------------------------…
Centruroides sculpturatus	Scorpion_Gene.466::hit_25::g.466::m.466 type:complete len:497 gc:universal hit_25:991-2481(+)	---------------------------------------------------------------------------------------------------------------------------------------------------------------------------------------------------------------------------------------------------------------------------------------------------------------------------------------------------------------------------------------------------------------…
Centruroides sculpturatus	Scorpion_Gene.403::hit_20::g.403::m.403 type:5prime_partial len:582 gc:universal hit_20:2-1747(+)	---------------------------------------------------------------------------------------------------------------------------------------------------------------------------------------------------------------------------------------------------------------------------------------------------------------------------------------------------------------------------------------------------------------…
Arabidopsis	ATCopia23#LTR/Copia 39-4058 Wised via estwise with ATCopia31 protein [Arabidopsis]	--------------------------------------------------------------------------------------------------------------------------------------------------------------------------------MS----------------------EKDG---------------------------------------------------------------------------------------------------------------------------------------------------------------------------------------------------…
Arabidopsis	ATCopia31#LTR/Copia 46-4050 ATCopia31A_pol >93% identical. [Arabidopsis]	--------------------------------------------------------------------------------------------------------------------------------------------------------------------------------MS----------------------EKES---------------------------------------------------------------------------------------------------------------------------------------------------------------------------------------------------…
Brassica rapa	Copia-11_BRa#LTR/Copia 67-4065 via tfasty with Copia-87_BRa, 89.0% SW:5210, 1 stopcodon. [Brassica rapa]	--------------------------------------------------------------------------------------------------------------------------------------------------------------------------------MS----------------------EKEF---------------------------------------------------------------------------------------------------------------------------------------------------------------------------------------------------…
Populus trichocarpa	Copia9-PTR#LTR/Copia 71-4106 via tfasty with ATCopia23_39-4058, 1 frameshift and 1 stopcodon. Copia-43_Mad about 80% identical with internal deletion. [Populus trichocarpa]	--------------------------------------------------------------------------------------------------------------------------------------------------------------------------------MA----------------------SENS---------------------------------------------------------------------------------------------------------------------------------------------------------------------------------------------------…
Prunus persica	Copia-35_Pru#LTR/Copia 75-4061 [Prunus persica]	--------------------------------------------------------------------------------------------------------------------------------------------------------------------------------MA----------------------SENS---------------------------------------------------------------------------------------------------------------------------------------------------------------------------------------------------…
Malus x domestica	Copia-67_Mad#LTR/Copia 94-4086 via tfasty with Copia37-PTR, 2 frameshifts. [Malus x domestica]	--------------------------------------------------------------------------------------------------------------------------------------------------------------------------------MA----------------------GEGS---------------------------------------------------------------------------------------------------------------------------------------------------------------------------------------------------…
Populus trichocarpa	Copia16-PTR#LTR/Copia 148-4294 via tfasty with ATCopia31_1-4050, 2 frameshifts [Populus trichocarpa]	--------------------------------------------------------------------------------------------------------------------------------------------------------------------------------M-----------------------SEGN---------------------------------------------------------------------------------------------------------------------------------------------------------------------------------------------------…
Populus trichocarpa	Copia18-PTR#LTR/Copia 77-4125 via tfasty with ATCopia23_39-4058, 1 frameshift and 1 stopcodon [Populus trichocarpa]	--------------------------------------------------------------------------------------------------------------------------------------------------------------------------------MT----------------------TEGS---------------------------------------------------------------------------------------------------------------------------------------------------------------------------------------------------…
Prunus persica	Copia-30_Pru#LTR/Copia 86-4098 via tfasty with Copia-35_Mad, 89.2% SW:5686, 1 frameshift. [Prunus persica]	--------------------------------------------------------------------------------------------------------------------------------------------------------------------------------MT----------------------SEGN---------------------------------------------------------------------------------------------------------------------------------------------------------------------------------------------------…
Malus x domestica	Copia-35_Mad#LTR/Copia 83-4258 via tfasty with Copia27-PTR, 2 frameshifts and 5 stopcodons. [Malus x domestica]	--------------------------------------------------------------------------------------------------------------------------------------------------------------------------------MS----------------------SEGN---------------------------------------------------------------------------------------------------------------------------------------------------------------------------------------------------…
Prunus persica	Copia-8_Pru#LTR/Copia 85-4074 [Prunus persica]	--------------------------------------------------------------------------------------------------------------------------------------------------------------------------------MT----------------------SEVN---------------------------------------------------------------------------------------------------------------------------------------------------------------------------------------------------…
Glycine max	Copia-7_GM#LTR/Copia 141-4154 [Glycine max]	--------------------------------------------------------------------------------------------------------------------------------------------------------------------------------MA----------------------EGGSS--------------------------------------------------------------------------------------------------------------------------------------------------------------------------------------------------…
Populus trichocarpa	Copia-64_PT#LTR/Copia 177-4232 via tfasty with Copia-7_GM, 89.0% SW:4824, 1 stopcodon. [Populus trichocarpa]	--------------------------------------------------------------------------------------------------------------------------------------------------------------------------------MT----------------------TPDK---------------------------------------------------------------------------------------------------------------------------------------------------------------------------------------------------…
Populus trichocarpa	Copia-74_PT#LTR/Copia 56-4702 76.1% sim to Copia-67_Mad, SW:4527, [Populus trichocarpa]	--------------------------------------------------------------------------------------------------------------------------------------------------------------------------------MA----------------------SESN---------------------------------------------------------------------------------------------------------------------------------------------------------------------------------------------------…
Solanum tuberosum	Copia-14_ST#LTR/Copia 48-4001 [Solanum tuberosum]	--------------------------------------------------------------------------------------------------------------------------------------------------------------------------------MS----------------------DDKTLT-------------------------------------------------------------------------------------------------------------------------------------------------------------------------------------------------…
Brassica rapa	Copia-8_BRa#LTR/Copia 49-4197 [Brassica rapa]	--------------------------------------------------------------------------------------------------------------------------------------------------------------------------------MS----------------------GEGNGNG------------------------------------------------------------------------------------------------------------------------------------------------------------------------------------------------…
Brassica rapa	Copia-89_BRa#LTR/Copia 46-4017 [Brassica rapa]	--------------------------------------------------------------------------------------------------------------------------------------------------------------------------------MA----------------------TEREMTL------------------------------------------------------------------------------------------------------------------------------------------------------------------------------------------------…
Populus trichocarpa	Copia45-PTR#LTR/Copia 153-4190 via tfasty with ATCopia31_1-4050, 4 stopcodons. [Populus trichocarpa]	--------------------------------------------------------------------------------------------------------------------------------------------------------------------------------MA----------------------SENN---------------------------------------------------------------------------------------------------------------------------------------------------------------------------------------------------…
Eutrema parvulum	Copia-18_EPa#LTR/Copia 89-4149 via tfasty with Copia18-PTR, 81.8% SW:3937, 1 frameshift and 4 stopcodons. [Eutrema parvulum]	--------------------------------------------------------------------------------------------------------------------------------------------------------------------------------MI----------------------DDKM---------------------------------------------------------------------------------------------------------------------------------------------------------------------------------------------------…
Arabidopsis	ATCopia78#LTR/Copia 32-4077 [Arabidopsis]	--------------------------------------------------------------------------------------------------------------------------------------------------------------------------------MA----------------------SNN-VP-------------------------------------------------------------------------------------------------------------------------------------------------------------------------------------------------…
Malus x domestica	Copia-53_Mad#LTR/Copia 17-4074 via tfasty with ATCopia78, 3 frameshifts and 3 stopcodons. [Malus x domestica]	--------------------------------------------------------------------------------------------------------------------------------------------------------------------------------MA----------------------NNVMAA-------------------------------------------------------------------------------------------------------------------------------------------------------------------------------------------------…
Glycine max	Copia-72_GM#LTR/Copia 47-4048 [Glycine max]	--------------------------------------------------------------------------------------------------------------------------------------------------------------------------------MA----------------------SNGAAS-------------------------------------------------------------------------------------------------------------------------------------------------------------------------------------------------…
Glycine max	GmCopia11#LTR/Copia 33-4079 [Glycine max]	--------------------------------------------------------------------------------------------------------------------------------------------------------------------------------MA----------------------NGG-FP-------------------------------------------------------------------------------------------------------------------------------------------------------------------------------------------------…
Carica papaya	Copia-11_CP#LTR/Copia 53-4105 [Carica papaya]	--------------------------------------------------------------------------------------------------------------------------------------------------------------------------------MT----------------------SNNLFS-------------------------------------------------------------------------------------------------------------------------------------------------------------------------------------------------…
Glycine max	Copia-71_GM#LTR/Copia 61-4149 [Glycine max]	--------------------------------------------------------------------------------------------------------------------------------------------------------------------------------MA----------------------SNGLSM-------------------------------------------------------------------------------------------------------------------------------------------------------------------------------------------------…
Phoenix dactylifera	Copia-9_PD#LTR/Copia 32-4141 via tfasty with POPCOP1, 88.8% SW:4802, 1 stopcodon. [Phoenix dactylifera]	--------------------------------------------------------------------------------------------------------------------------------------------------------------------------------MN----------------------SSSVQS-------------------------------------------------------------------------------------------------------------------------------------------------------------------------------------------------…
Populus trichocarpa	POPCOP1#LTR/Copia 29-4084 [Populus trichocarpa]	--------------------------------------------------------------------------------------------------------------------------------------------------------------------------------MT----------------------SNNNYSQ------------------------------------------------------------------------------------------------------------------------------------------------------------------------------------------------…
Malus x domestica	Copia-106_Mad#LTR/Copia 45-4064 [Malus x domestica]	--------------------------------------------------------------------------------------------------------------------------------------------------------------------------------MA----------------------SNLVQ--------------------------------------------------------------------------------------------------------------------------------------------------------------------------------------------------…
Populus trichocarpa	Copia5-PTR#LTR/Copia 530-4663 via tfasty with ATCopia78_2-4077, 3 stopcodons. [Populus trichocarpa]	--------------------------------------------------------------------------------------------------------------------------------------------------------------------------------MT----------------------TENAHA-------------------------------------------------------------------------------------------------------------------------------------------------------------------------------------------------…
Vitis vinifera	Copia-81_VV#LTR/Copia 126-4192 via tfasty with Copia-106_Mad, 79.8% SW:3639, 1 frameshift and 4 stopcodons. [Vitis vinifera]	--------------------------------------------------------------------------------------------------------------------------------------------------------------------------------MA----------------------TNNNSIH------------------------------------------------------------------------------------------------------------------------------------------------------------------------------------------------…
Malus x domestica	Copia-104_Mad#LTR/Copia 36-4128 [Malus x domestica]	--------------------------------------------------------------------------------------------------------------------------------------------------------------------------------MA----------------------NANANGHN-----------------------------------------------------------------------------------------------------------------------------------------------------------------------------------------------…
Solanum tuberosum	Copia-5_ST#LTR/Copia 48-4061 via tfasty with SHACOP21_MT, 77.0% SW:3121, 5 frameshifts and 3 stopcodons. [Solanum tuberosum]	--------------------------------------------------------------------------------------------------------------------------------------------------------------------------------MA----------------------VNG----------------------------------------------------------------------------------------------------------------------------------------------------------------------------------------------------…
Vitis vinifera	Copia-61_VV#LTR/Copia 47-4040 via tfasty with SHACOP8_MT, 78.4% SW:3352, 2 frameshifts. [Vitis vinifera]	--------------------------------------------------------------------------------------------------------------------------------------------------------------------------------MA----------------------TTNGSM-------------------------------------------------------------------------------------------------------------------------------------------------------------------------------------------------…
Glycine max	Copia-8_GM#LTR/Copia 65-4037 via tfasty with Copia-93_GM, 79.8% SW:3656, 1 frameshift. [Glycine max]	--------------------------------------------------------------------------------------------------------------------------------------------------------------------------------MA----------------------TTLSNNG------------------------------------------------------------------------------------------------------------------------------------------------------------------------------------------------…
Glycine max	Copia-16_GM#LTR/Copia 149-4178 via tfasty with Copia-93_GM, 82.6% SW:3891, 2 frameshifts and 1 stopcodon. [Glycine max]	--------------------------------------------------------------------------------------------------------------------------------------------------------------------------------MT----------------------SNGVPMN------------------------------------------------------------------------------------------------------------------------------------------------------------------------------------------------…
Glycine max	Copia-91_GM#LTR/Copia 46-4134 [Glycine max]	--------------------------------------------------------------------------------------------------------------------------------------------------------------------------------MA---------------------LNTGSFAT------------------------------------------------------------------------------------------------------------------------------------------------------------------------------------------------…
Glycine max	Copia-93_GM#LTR/Copia 55-4083 [Glycine max]	--------------------------------------------------------------------------------------------------------------------------------------------------------------------------------MA----------------------SATNTGG------------------------------------------------------------------------------------------------------------------------------------------------------------------------------------------------…
Medicago truncatula	COP12_MT#LTR/Copia 76-4044 [Medicago truncatula]	--------------------------------------------------------------------------------------------------------------------------------------------------------------------------------MA----------------------SGSNAV-------------------------------------------------------------------------------------------------------------------------------------------------------------------------------------------------…
Medicago truncatula	SHACOP4_MT#LTR/Copia 81-4022 [Medicago truncatula]	--------------------------------------------------------------------------------------------------------------------------------------------------------------------------------MA----------------------SNNITL-------------------------------------------------------------------------------------------------------------------------------------------------------------------------------------------------…
Prunus persica	Copia-32_Pru#LTR/Copia 120-4237 [Prunus persica]	--------------------------------------------------------------------------------------------------------------------------------------------------------------------------------MA----------------------GSGSSE-------------------------------------------------------------------------------------------------------------------------------------------------------------------------------------------------…
Malus x domestica	Copia-78_Mad#LTR/Copia 114-4273 via tfasty with Copia-64_Mad, 1 frameshift. [Malus x domestica]	--------------------------------------------------------------------------------------------------------------------------------------------------------------------------------MS----------------------GSGGSE-------------------------------------------------------------------------------------------------------------------------------------------------------------------------------------------------…
Malus x domestica	Copia-85_Mad#LTR/Copia 140-4316 via tfasty with Copia-64_Mad, 2 frameshifts. [Malus x domestica]	--------------------------------------------------------------------------------------------------------------------------------------------------------------------------------MA----------------------GSGSAE-------------------------------------------------------------------------------------------------------------------------------------------------------------------------------------------------…
Prunus persica	Copia-39_Pru#LTR/Copia 140-4206 [Prunus persica]	--------------------------------------------------------------------------------------------------------------------------------------------------------------------------------MA----------------------GSGGGE-------------------------------------------------------------------------------------------------------------------------------------------------------------------------------------------------…
Malus x domestica	Copia-64_Mad#LTR/Copia 148-4235 [Malus x domestica]	--------------------------------------------------------------------------------------------------------------------------------------------------------------------------------MA----------------------GSSGAD-------------------------------------------------------------------------------------------------------------------------------------------------------------------------------------------------…
Malus x domestica	Copia-68_Mad#LTR/Copia 115-4223 [Malus x domestica]	--------------------------------------------------------------------------------------------------------------------------------------------------------------------------------MA----------------------GSGGGE-------------------------------------------------------------------------------------------------------------------------------------------------------------------------------------------------…
Sorghum bicolor	Copia-9_SB#LTR/Copia 42-4404 via tfasty with SC-8, 1 frameshift and 1 stopcodon. [Sorghum bicolor]	---------------------------------------------------------------------------------------------------------------------------------------------------------------------------PA---MA----------------------ESAGRNG-----------------------------------------------------------------------------------------------------------------------------------------------------------------------------------------------G…
Brachypodium distachyon	Copia-14_BD#LTR/Copia 37-4331 via tfasty with Copia50-PTR, 3 frameshifts and 2 stopcodons. [Brachypodium distachyon]	--------------------------------------------------------------------------------------------------------------------------------------------------------------------------------MP----------------------ETAEEALKAAEEA-------RADAAA-------------ARAEADAAKAELAALKGKAEAV--------------------D--------------------------------------------------------------------------------------------AEVKPD-------------------…
Brachypodium distachyon	Copia-20_BD#LTR/Copia 36-4375 via tfasty with Copia50-PTR, 1 frameshift. [Brachypodium distachyon]	--------------------------------------------------------------------------------------------------------------------------------------------------------------------------------MS----------------------TTPEELKKALEDA-------LAELKV-------------TRLEAEGTKAELAAVKGKKV----------------------D--------------------------------------------------------------------------------------------VEEKPG-------------------…
Oryza sativa	CPSC3#LTR/Copia 35-4312 [Oryza sativa]	--------------------------------------------------------------------------------------------------------------------------------------------------------------------------------MS---------------------------YTPPGRRG---------------------------GGGGGGSGNGRGGASGSGG----------------------------------------------------------------------------------------------------------------------------------------G-NG…
Oryza sativa	CPSC4A#LTR/Copia 38-4345 [Oryza sativa]	--------------------------------------------------------------------------------------------------------------------------------------------------------------------------------MS----------------------DDGGRYTPPGRRG---------------------------GGGGGGSGSGRGGASGSGV----------------------------------------------------------------------------------------------------------------------------------------G-GG…
Sorghum bicolor	Copia-14_SB#LTR/Copia 34-4682 via tfasty with Copia-11_SB, 1 frameshift. [Sorghum bicolor]	--------------------------------------------------------------------------------------------------------------------------------------------------------------------------------MA----------------------TSAERAAAAAAAAAGQ----RAQ--------------RLAAAEAAAAQAQQAAEAAAAAAREAAT-----TAAALRRELW-DEQPFEE--------------------------------------EPHQDLREEPRDR--------------------------------RRPLRRSPDRMRRQSRSPDQDRRRG-RG…
Sorghum bicolor	Copia-27_SB#LTR/Copia 23-4302 via tfasty with Copia-29_SB, 1 frameshift. [Sorghum bicolor]	MQY-----------------------------------------------------------------------------------------------------DGSV-------------------------------SPPREPPHKKF----------VVLKKS-----PPPIAMG----------------------DQGSSSG------------------------------------------------------------------------------------------------------------------------------------------------------------------------------------------------…
Sorghum bicolor	Copia-103_SB#LTR/Copia 122-4405 via tfasty with Copia-28_SB, 2 frameshifts and 1 stopcodon. [Sorghum bicolor]	--------------------------------------------------------------------------------------------------------------------------------------------------------------------------------MG----------------------ETSKEQDMME---------------------------------------------------------------------W-----------------------------------------------------------------------------------------------------------------------…
Tribolium castaneum	Copia-1_TCa#LTR/Copia 120-4040 [Tribolium castaneum]	--------------------------------------------------------------------------------------------------------------------------------------------------------------------------------ME----------------------NTTIEK-------------------------------------------------------------------------------------------------------------------------------------------------------------------------------------------------…
Tribolium castaneum	Tcas_TC015470	--------------------------------------------------------------------------------------------------------------------------------------------------------------------------------ME----------------------NTTIEK-------------------------------------------------------------------------------------------------------------------------------------------------------------------------------------------------…
Acyrthosiphon pisum	Apis_ACYPI24114	--------------------------------------------------------------------------------------------------------------------------------------------------------------------------------MS----------------------KRTEEK-------------------------------------------------------------------------------------------------------------------------------------------------------------------------------------------------…
Aedes aegypti	Copia-114_AA#LTR/Copia 8-3979 [Aedes aegypti]	--------------------------------------------------------------------------------------------------------------------------------------------------------------------------------MG----------------------TTQKELAH-----------------------------------------------------------------------------------------------------------------------------------------------------------------------------------------------…
Aedes aegypti	Copia-118_AA#LTR/Copia 5-3905 via tfasty with Copia-114_AA, 1 frameshift. [Aedes aegypti]	--------------------------------------------------------------------------------------------------------------------------------------------------------------------------------MG----------------------DHR----------------------------------------------------------------------------------------------------------------------------------------------------------------------------------------------------…
Aedes aegypti	Copia-115_AA#LTR/Copia 25-3985 [Aedes aegypti]	--------------------------------------------------------------------------------------------------------------------------------------------------------------------------------MG----------------------PSMKEGS------------------------------------------------------------------------------------------------------------------------------------------------------------------------------------------------…
Aedes aegypti	Copia-121_AA#LTR/Copia 8-3929 [Aedes aegypti]	--------------------------------------------------------------------------------------------------------------------------------------------------------------------------------MG----------------------SSKE---------------------------------------------------------------------------------------------------------------------------------------------------------------------------------------------------…
Aedes aegypti	Zebedee#LTR/Copia 831-3202 Fragment, via tfasty with Copia15-NVi, 4 frameshifts and 4 stopcodons. Zebedee is likely non-autonomous, missing over 400 N-terminal AA and with an insertion at 530-830 ([Aedes aegypti]	---------------------------------------------------------------------------------------------------------------------------------------------------------------------------------------------------------------------------------------------------------------------------------------------------------------------------------------------------------------------------------------------------------------…
Aedes aegypti	Copia-128_AA#LTR/Copia 90-4063 via tfasty with Copia-138_AA, 1 frameshift. [Aedes aegypti]	--------------------------------------------------------------------------------------------------------------------------------------------------------------------------------MS----------------------SAKK---------------------------------------------------------------------------------------------------------------------------------------------------------------------------------------------------…
Aedes aegypti	Copia-138_AA#LTR/Copia 139-4164 [Aedes aegypti]	--------------------------------------------------------------------------------------------------------------------------------------------------------------------------------MA----------------------SSAKKA-------------------------------------------------------------------------------------------------------------------------------------------------------------------------------------------------…
Centruroides sculpturatus	Scorpion_Gene.1088::hit_61::g.1088::m.1088 type:complete len:1081 gc:universal hit_61:3804-7046(+)	--------------------------------------------------------------------------------------------------------------------------------------------------------------------------------MG----------------------PDK----------------------------------------------------------------------------------------------------------------------------------------------------------------------------------------------------…
Blumeria graminis	Copia-15_BG#LTR/Copia 66-4276 via tfasty with Copia-26_BG, 70.3% SW:2589, 1 frameshift and 1 stopcodon. [Blumeria graminis]	--------------------------------------------------------------------------------------------------------------------------------------------------------------------------------MP----------------------TTVTINDIK----------------------------------------------------------------------------------------------------------------------------------------------------------------------------------------------…
Strigamia maritima	AFFK01017825.g3003.t1	---------------------------------------------------------------------------------------------------------------------------------------------------------------------------------------------------------------------------------------------------------------------------------------------------------------------------------------------------------------------------------------------------------------…
Strigamia maritima	JH431315.g3189.t1	---------------------------------------------------------------------------------------------------------------------------------------------------------------------------------------------------------------------------------------------------------------------------------------------------------------------------------------------------------------------------------------------------------------…
Strigamia maritima	JH431535.g5576.t1	---------------------------------------------------------------------------------------------------------------------------------------------------------------------------------------------------------------------------------------------------------------------------------------------------------------------------------------------------------------------------------------------------------------…
Aedes aegypti	Copia-95_AA#LTR/Copia 3-3449 via tfasty with Copia-11_CQ, 2 frameshifts. Internal deletion [Aedes aegypti]	---------------------------------------------------------------------------------------------------------------------------------------------------------------------------------------------------------------------------------------------------------------------------------------------------------------------------------------------------------------------------------------------------------------…
Aedes aegypti	Copia-109_AA#LTR/Copia 76-4186 via tfasty with Copia-11_CQ, 1 frameshift. [Aedes aegypti]	--------------------------------------------------------------------------------------------------------------------------------------------------------------------------------MS----------------------VNDVEVKAG----------------------------------------------------------------------------------------------------------------------------------------------------------------------------------------------…
Aedes aegypti	Copia-111_AA#LTR/Copia 39-4666 via tfasty with Copia-11_CQ, 1 frameshift and 1 stopcodon. [Aedes aegypti]	M---------------------------------------------------DQDESAVVSSRN------------------------ESAVVSSR----KKSATGSN-RYESAVGRDRDELAVGSSRN---E------SAPGRGRGESA-VGRARNESAVGSSRNESAVDSSRNELS----------------------RSKNESGSSQDRGAVGSSRGRATGAI-------------PKHGGRSRSEDGATSANHSRERAAGVSRGESGHTATNRGR--DNAAGE-------------SRSYIRNDAAGRGINRT-----------VSQNRSRDQDGGVHGWDR----------------------------RDETPGRN-----------RFG---…
Aedes aegypti	Copia-103_AA#LTR/Copia 406-5448 [Aedes aegypti]	--------------------------------------------------------------------------------------------------------------------------------------------------------------------------------ME----------------------NRVVKR-------------------------------------------------------------------------------------------------------------------------------------------------------------------------------------------------…
Aedes aegypti	Copia-131_AA#LTR/Copia 370-4377 [Aedes aegypti]	--------------------------------------------------------------------------------------------------------------------------------------------------------------------------------ME----------------------NRLK---------------------------------------------------------------------------------------------------------------------------------------------------------------------------------------------------…
Aedes aegypti	Copia-117_AA#LTR/Copia 166-4365 [Aedes aegypti]	M---------------------------------------------------KI--------------------------------------------------IGSS------------------------------------------------------------------TTMS----------------------EVGQRQ-------------------------------------------------------------------------------------------------------------------------------------------------------------------------------------------------…
Trigoniulus corallinus	Millipede_Gene.34::scaffold160970::g.34::m.34 type:complete len:60 gc:universal scaffold160970:3797-3618(-)	---------------------------------------------------------------------------------------------------------------------------------------------------------------------------------------------------------------------------------------------------------------------------------------------------------------------------------------------------------------------------------------------------------------…
Coprinopsis cinerea	Copia-1_CCO#LTR/Copia 124-4470 57.8% sim to Copia-7_ADe, SW:1388, [Coprinopsis cinerea]	--------------------------------------------------------------------------------------------------------------------------------------------------------------------------------MS----------------------DQHSGTAT-----------------------------------------------------------------------------------------------------------------------------------------------------------------------------------------------…
Coprinopsis cinerea	Copia-2_CCO#LTR/Copia 111-4321 via tfasty with PCretro3, 64.7% SW:2063, 3 frameshifts. [Coprinopsis cinerea]	--------------------------------------------------------------------------------------------------------------------------------------------------------------------------------MP----------------------EEYTGG-------------------------------------------------------------------------------------------------------------------------------------------------------------------------------------------------…
Schizophyllum commune	Copia-5_SCH#LTR/Copia 89-4417 [Schizophyllum commune]	--------------------------------------------------------------------------------------------------------------------------------------------------------------------------------MS----------------------SSSGS--------------------------------------------------------------------------------------------------------------------------------------------------------------------------------------------------…
Strigamia maritima	AFFK01019997.g4960.t1	---------------------------------------------------------------------------------------------------------------------------------------------------------------------------------------------------------------------------------------------------------------------------------------------------------------------------------------------------------------------------------------------------------------…
Drosophila fruit fly genus	Copia#LTR/Copia 156-4385 [Drosophila fruit fly genus]	--------------------------------------------------------------------------------------------------------------------------------------------------------------------------------MD----------------------KAKR---------------------------------------------------------------------------------------------------------------------------------------------------------------------------------------------------…
Drosophila ananassae	Copia-5_DAn#LTR/Copia 192-4351 via tfasty with Copia-1_DPer, 85.9% SW:4838, 1 frameshift and 1 stopcodon. [Drosophila ananassae]	--------------------------------------------------------------------------------------------------------------------------------------------------------------------------------ME----------------------KSKR---------------------------------------------------------------------------------------------------------------------------------------------------------------------------------------------------…
Drosophila persimilis	Copia-1_DPer#LTR/Copia 137-4386 via tfasty with Copia, 2 frameshifts and 1 stopcodon. [Drosophila persimilis]	--------------------------------------------------------------------------------------------------------------------------------------------------------------------------------ME----------------------RNKQ---------------------------------------------------------------------------------------------------------------------------------------------------------------------------------------------------…
Drosophila mojavensis	Copia-4_DMoj#LTR/Copia 174-4264 via tfasty with Copia-1_DPer, 87.1% SW:4998, 1 frameshift and 1 stopcodon. [Drosophila mojavensis]	---------------------------------------------------------------------------------------------------------------------------------------------------------------------------------------------------------------------------------------------------------------------------------------------------------------------------------------------------------------------------------------------------------------…
Drosophila elegans	Copia-2_DEl#LTR/Copia 89-4359 via tfasty with Copia-1_DPer, 84.9% SW:4589, 3 frameshifts and 2 stopcodons. [Drosophila elegans]	M-----------------------------------------------------------------------------------------------------------------------------------------------------------------------------YMMD----------------------KSKR---------------------------------------------------------------------------------------------------------------------------------------------------------------------------------------------------…
Drosophila biarmipes	Copia-1_DBi#LTR/Copia 525-4553 [Drosophila biarmipes]	--------------------------------------------------------------------------------------------------------------------------------------------------------------------------------MD----------------------KGKR---------------------------------------------------------------------------------------------------------------------------------------------------------------------------------------------------…
Drosophila yakuba	Copia-2_DYa#LTR/Copia 285-4476 via tfasty with Copia-1_DBi, 87.9% SW:5222, 1 frameshift. [Drosophila yakuba]	--------------------------------------------------------------------------------------------------------------------------------------------------------------------------------MD----------------------KGKR---------------------------------------------------------------------------------------------------------------------------------------------------------------------------------------------------…
Nasonia vitripennis	Copia2-NVi#LTR/Copia 108-4114 via tfasty with Copia3_XT, 4 frameshifts and 2 stopcodons. [Nasonia vitripennis]	--------------------------------------------------------------------------------------------------------------------------------------------------------------------------------MT----------------------TANESP-------------------------------------------------------------------------------------------------------------------------------------------------------------------------------------------------…
Nasonia vitripennis	Copia15-NVi#LTR/Copia 93-4148 [Nasonia vitripennis]	--------------------------------------------------------------------------------------------------------------------------------------------------------------------------------MS----------------------QEHSNY-------------------------------------------------------------------------------------------------------------------------------------------------------------------------------------------------…
Nasonia vitripennis	Copia19-NVi#LTR/Copia 3-2656 via tfasty with Copia5-NVi, 1 frameshift. (fragment) [Nasonia vitripennis]	---------------------------------------------------------------------------------------------------------------------------------------------------------------------------------------------------------------------------------------------------------------------------------------------------------------------------------------------------------------------------------------------------------------…
Nasonia vitripennis	Copia5-NVi#LTR/Copia 135-4135 via tfasty with Copia3_XT, 1 frameshift and 1 stopcodon. [Nasonia vitripennis]	--------------------------------------------------------------------------------------------------------------------------------------------------------------------------------MA----------------------ETSDLK-------------------------------------------------------------------------------------------------------------------------------------------------------------------------------------------------…
Nasonia vitripennis	Copia14-NVi#LTR/Copia 168-4225 via tfasty with Copia5-NVi, 1 frameshift and 2 stopcodons. [Nasonia vitripennis]	--------------------------------------------------------------------------------------------------------------------------------------------------------------------------------MS----------------------DISSQD-LR----------------------------------------------------------------------------------------------------------------------------------------------------------------------------------------------…
Solenopsis invicta	Copia-2_SI#LTR/Copia 254-4212 via tfasty with Copia-24_SI, 80.3% SW:3491, 2 frameshifts. [Solenopsis invicta]	M-------------------------------------------------------------------------------------------------------------------------------------------------------------------------------MA----------------------DSLVDLK------------------------------------------------------------------------------------------------------------------------------------------------------------------------------------------------…
Nasonia vitripennis	Copia3-NVi#LTR/Copia 181-4095 [Nasonia vitripennis]	--------------------------------------------------------------------------------------------------------------------------------------------------------------------------------MA----------------------GEISTR-------------------------------------------------------------------------------------------------------------------------------------------------------------------------------------------------…
Nasonia vitripennis	Copia11-NVi#LTR/Copia 72-4097 [Nasonia vitripennis]	--------------------------------------------------------------------------------------------------------------------------------------------------------------------------------MA----------------------TDAIIR-------------------------------------------------------------------------------------------------------------------------------------------------------------------------------------------------…
Tribolium castaneum	Copia-2_TCa#LTR/Copia 158-4010 via tfasty with Copia-24_SI, 75.0% SW:2907, 1 frameshift. [Tribolium castaneum]	--------------------------------------------------------------------------------------------------------------------------------------------------------------------------------MA----------------------DGINLS-------------------------------------------------------------------------------------------------------------------------------------------------------------------------------------------------…
Tribolium castaneum	Tcas_TC009115	--------------------------------------------------------------------------------------------------------------------------------------------------------------------------------MA----------------------DGINLS-------------------------------------------------------------------------------------------------------------------------------------------------------------------------------------------------…
Xenopus (silurana) tropicalis	Copia2_XT#LTR/Copia 112-3928 via tfasty with ATCopia78_2-4077, 4 frameshifts and 2 stopcodons. [Xenopus (silurana) tropicalis]	---------------------------------------------------------------------------------------------------------------------------------------------------------------------------------------------------------------------------------------------------------------------------------------------------------------------------------------------------------------------------------------------------------------…
Takifugu	Kopi1_pol#LTR/Copia 6-2150 Fragment (misses N-term), via tfasty with Copia1_DR, 2 frameshifts and 1 stopcodon. [Takifugu]	---------------------------------------------------------------------------------------------------------------------------------------------------------------------------------------------------------------------------------------------------------------------------------------------------------------------------------------------------------------------------------------------------------------…
Takifugu	Kopi2_pol#LTR/Copia 619-3959 via tfasty with TNT1, 7 frameshifts and 8 stopcodons. [Takifugu]	--------------------------------------------------------------------------------------------------------------------------------------------------------------------------------M------------------------------------------------------------------------------------------------------------------------------------------------------------------------------------------------------------------------------…
Nematostella vectensis	Copia-1_NV#LTR/Copia 103-3987 [Nematostella vectensis]	--------------------------------------------------------------------------------------------------------------------------------------------------------------------------------M------------------------------------------------------------------------------------------------------------------------------------------------------------------------------------------------------------------------------…
Nematostella vectensis	Copia-4_NV#LTR/Copia 151-4038 [Nematostella vectensis]	--------------------------------------------------------------------------------------------------------------------------------------------------------------------------------MR-----------------------------------------------------------------------------------------------------------------------------------------------------------------------------------------------------------------------------…
Hydra magnipapillata	Hmag_XP_002166814	---------------------------------------------------------------------------------------------------------------------------------------------------------------------------------------------------------------------------------------------------------------------------------------------------------------------------------------------------------------------------------------------------------------…
Hydra magnipapillata	Hmag_XP_002161393	---------------------------------------------------------------------------------------------------------------------------------------------------------------------------------------------------------------------------------------------------------------------------------------------------------------------------------------------------------------------------------------------------------------…
Hydra magnipapillata	Hmag_XP_002157459	--------------------------------------------------------------------------------------------------------------------------------------------------------------------------------MS----------------------EHKILTGYGPS--------------------------------------------------------------------------------------------------------------------------------------------------------------------------------------------…
Hydra magnipapillata	Hmag_XP_002168807	---------------------------------------------------------------------------------------------------------------------------------------------------------------------------------------------------------------------------------------------------------------------------------------------------------------------------------------------------------------------------------------------------------------…
Hydra magnipapillata	Hmag_XP_002162479	--------------------------------------------------------------------------------------------------------------------------------------------------------------------------------MS----------------------EHKILTGYGPS--------------------------------------------------------------------------------------------------------------------------------------------------------------------------------------------…
Hydra magnipapillata	Hmag_XP_002166215	---------------------------------------------------------------------------------------------------------------------------------------------------------------------------------------------------------------------------------------------------------------------------------------------------------------------------------------------------------------------------------------------------------------…
Hydra magnipapillata	Hmag_XP_002169772	---------------------------------------------------------------------------------------------------------------------------------------------------------------------------------------------------------------------------------------------------------------------------------------------------------------------------------------------------------------------------------------------------------------…
Hydra magnipapillata	Hmag_XP_002169259	--------------------------------------------------------------------------------------------------------------------------------------------------------------------------------MS----------------------EHKILTGYGPS--------------------------------------------------------------------------------------------------------------------------------------------------------------------------------------------…
Parhyale hawaiensis	Phaw_30_tra_m.008527	--------------------------------------------------------------------------------------------------------------------------------------------------------------------------------MK-----------------------------------------------------------------------------------------------------------------------------------------------------------------------------------------------------------------------------…
Lingula anatina	Lana_g21653.t1	---------------------------------------------------------------------------------------------------------------------------------------------------------------------------------------------------------------------------------------------------------------------------------------------------------------------------------------------------------------------------------------------------------------…
Lingula anatina	Lana_g24178.t1	---------------------------------------------------------------------------------------------------------------------------------------------------------------------------------------------------------------------------------------------------------------------------------------------------------------------------------------------------------------------------------------------------------------…
Strigamia maritima	JH429571.g1613.t1	---------------------------------------------------------------------------------------------------------------------------------------------------------------------------------------------------------------------------------------------------------------------------------------------------------------------------------------------------------------------------------------------------------------…
Strigamia maritima	JH430294.g5370.t1	---------------------------------------------------------------------------------------------------------------------------------------------------------------------------------------------------------------------------------------------------------------------------------------------------------------------------------------------------------------------------------------------------------------…
Strigamia maritima	JH431582.g5643.t1	---------------------------------------------------------------------------------------------------------------------------------------------------------------------------------------------------------------------------------------------------------------------------------------------------------------------------------------------------------------------------------------------------------------…
Strigamia maritima	JH431806.g7929.t1	---------------------------------------------------------------------------------------------------------------------------------------------------------------------------------------------------------------------------------------------------------------------------------------------------------------------------------------------------------------------------------------------------------------…
Strigamia maritima	JH431987.g6606.t1	---------------------------------------------------------------------------------------------------------------------------------------------------------------------------------------------------------------------------------------------------------------------------------------------------------------------------------------------------------------------------------------------------------------…
Strigamia maritima	JH431326.g2614.t1	---------------------------------------------------------------------------------------------------------------------------------------------------------------------------------------------------------------------------------------------------------------------------------------------------------------------------------------------------------------------------------------------------------------…
Strigamia maritima	JH431981.g5806.t1	---------------------------------------------------------------------------------------------------------------------------------------------------------------------------------------------------------------------------------------------------------------------------------------------------------------------------------------------------------------------------------------------------------------…
Centruroides sculpturatus	Scorpion_Gene.1097::hit_62::g.1097::m.1097 type:complete len:1305 gc:universal hit_62:6716-10630(+)	--------------------------------------------------------------------------------------------------------------------------------------------------------------------------------MS----------------------VRVKSGLFS----------------------------------------------------------------------------------------------------------------------------------------------------------------------------------------------…
Centruroides sculpturatus	Scorpion_Gene.4001::hit_201::g.4001::m.4001 type:complete len:1316 gc:universal hit_201:6740-10687(+)	MLF----------------------------------------------RSYKTENTELAYTR-------------------------EYPKF-------------------------------------------------------------------IQIRRSRKPK----KEMA----------------------SLTSQI-------------------------------------------------------------------------------------------------------------------------------------------------------------------------------------------------…
Centruroides sculpturatus	Scorpion_Gene.5346::hit_271::g.5346::m.5346 type:complete len:740 gc:universal hit_271:6248-8467(+)	--------------------------------------------------------------------------------------------------------------------------------------------------------------------------------MR-----------------------------------------------------------------------------------------------------------------------------------------------------------------------------------------------------------------------------…
Medicago truncatula	COP14_MT#LTR/Copia 262-3950 via tfasty with TST1, 2 frameshifts and 3 stopcodons. [Medicago truncatula]	---------------------------------------------------------------------------------------------------------------------------------------------------------------------------------------------------------------------------------------------------------------------------------------------------------------------------------------------------------------------------------------------------------------…
Vitis vinifera	Copia-56_VV#LTR/Copia 39-4600 via tfasty with Copia-74_GM, 85.2% SW:5251, 1 frameshift and 2 stopcodons. [Vitis vinifera]	-----------------------------------------------------MAKTA----------------------------------------------------------------------------------------------------------------------MT----------------------GASKTSSSSEA-------------------------------TTENVQSETAMRSSADF--------------------------------------------------------------------------------------------------------------------------------------------…
Carica papaya	Copia-18_CP#LTR/Copia 142-4467 via tfasty with Copia-91_VV, 81.5% SW:4486, 1 stopcodon. [Carica papaya]	--------------------------------------------------------------------------------------------------------------------------------------------------------------------------------------------------------------------------------------------------------------------G------------------------------------------------------------------------------------------------------------------------------------------…
Malus x domestica	Copia-62_Mad#LTR/Copia 67-4621 via tfasty with Copia44-PTR, 2 frameshifts. [Malus x domestica]	-----------------------------------------------------MENLPPLHGGN-------------------------------------------------------------------------------------------------------------NPILT----------------------DSTPTLNT-------------------------------------TTLTDPTMNPTLPIPQV-----------------------------------------------------------------------------------------------------------------------------------------…
Malus x domestica	Copia-83_Mad_pol#LTR/Copia 274-3615 [Malus x domestica]	--------------------------------------------------------------------------------------------------------------------------------------------------------------------------------MA----------------------Q------------------------------------------------------------------------------------------------------------------------------------------------------------------------------------------------------…
Vitis vinifera	Copia-80_VV#LTR/Copia 781-5087 via tfasty with Copia-74_GM, 75.7% SW:3471, 7 frameshifts. [Vitis vinifera]	---------------------------------------------------------------------------------------------------------------------------------------------------------------------------------------------------------------------------------------------------------------------------------------------------------------------------------------------------------------------------------------------------------------…
Brachypodium distachyon	Copia-23_BD#LTR/Copia 2058-5536 via tfasty with OSR3, 3 frameshifts and 1 stopcodon. [Brachypodium distachyon]	--------------------------------------------------------------------------------------------------------------------------------------------------------------------------------MT----------------------A------------------------------------------------------------------------------------------------------------------------------------------------------------------------------------------------------…
Oryza sativa	SC-7#LTR/Copia 649-4189 Wised via estwise with OSR3/Copia protein (1 frameshift) N term extended wth ORF [Oryza sativa]	--------------------------------------------------------------------------------------------------------------------------------------------------------------------------------MG----------------------E------------------------------------------------------------------------------------------------------------------------------------------------------------------------------------------------------…
Populus trichocarpa	Copia19-PTR#LTR/Copia 47-4534 (1 stopcodon) [Populus trichocarpa]	-----------------------------------------------------MEDPFK---------------------------------------------------------------------------------------------------------------------MD----------------------NAEGINRSC----------------------------------------------------------------------------------------------------------------------------------------------------------------------------------------------…
Glycine max	Copia-5_GM#LTR/Copia 135-4553 [Glycine max]	--------------------------------------------------------------------------------------------------------------------------------------------------------------------------------MA----------------------LQNFVD----------------------------F----------------STNSANPY--------------------------------------------------------------------------------------------------------------------------------------------…
Glycine max	Copia-44_GM#LTR/Copia 53-4642 via tfasty with MTCopia1, 74.0% SW:3546, 2 frameshifts and 4 stopcodons. [Glycine max]	-----------------------------------------------------MLDT---------------------------------------------------------------------------------------------------------------------PPIS----------------------PKKSSSSPKHDA------------------------------GSGTVTTDPTLNPSSPY--------------------------------------------------------------------------------------------------------------------------------------------…
Medicago truncatula	SHACOP23_MT#LTR/Copia 26-4372 [Medicago truncatula]	--------------------------------------------------------------------------------------------------------------------------------------------------------------------------------MA----------------------PRNNASTS-------------------------------------NEQGAPAIDPSSPY--------------------------------------------------------------------------------------------------------------------------------------------…
Prunus persica	Copia-12_Pru#LTR/Copia 77-4467 [Prunus persica]	--------------------------------------------------------------------------------------------------------------------------------------------------------------------------------MV----------------------DSADMKST----------------------------------SSGMTSRSRWESPNHPL--------------------------------------------------------------------------------------------------------------------------------------------…
Malus x domestica	Copia-79_Mad_pol#LTR/Copia 112-3556 via tfasty with ATCopia75, 1 frameshift. [Malus x domestica]	--------------------------------------------------------------------------------------------------------------------------------------------------------------------------------M------------------------------------------------------------------------------------------------------------------------------------------------------------------------------------------------------------------------------…
Brassica rapa	Copia-113_BRa#LTR/Copia 102-4541 [Brassica rapa]	--------------------------------------------------------------------------------------------------------------------------------------------------------------------------------MS----------------------ITTTPT----------------------------------------SATTGVPPELSPY--------------------------------------------------------------------------------------------------------------------------------------------…
Solanum tuberosum	Copia-24_ST#LTR/Copia 175-4865 via tfasty with Copia-74_ST, 79.0% SW:4748, 3 frameshifts and 4 stopcodons. [Solanum tuberosum]	--------------------------------------------------------------------------------------------------------------------------------------------------------------------------------MV----------------------ELTNEGSSA---------------GI-------------------NTGSSTGIDTNSHL--------------------------------------------------------------------------------------------------------------------------------------------…
Solanum tuberosum	Copia-27_ST#LTR/Copia 126-4749 via tfasty with Copia-74_ST, 81.0% SW:4929, 1 frameshift. [Solanum tuberosum]	--------------------------------------------------------------------------------------------------------------------------------------------------------------------------------MA----------------------IDESTSTAAT--------------NV-------------------TAGGSSLIDLNNPL--------------------------------------------------------------------------------------------------------------------------------------------…
Solanum tuberosum	Copia-42_ST#LTR/Copia 89-4713 via tfasty with Copia-74_ST, 72.2% SW:3440, 1 frameshift. [Solanum tuberosum]	--------------------------------------------------------------------------------------------------------------------------------------------------------------------------------MD----------------------EETEIS---------------------------------------SKKTSEQIDVSHPY--------------------------------------------------------------------------------------------------------------------------------------------…
Arabidopsis thaliana	ATCOPI1#LTR/Copia 15-4345 [Arabidopsis thaliana]	--------------------------------------------------------------------------------------------------------------------------------------------------------------------------------ME----------------------IRSMAPYT-----------------------------------------------------------------------------------------------------------------------------------------------------------------------------------------------…
Arabidopsis thaliana	ATCopia8A#LTR/Copia 15-4238 Copia-3_AT product very close. [Arabidopsis thaliana]	--------------------------------------------------------------------------------------------------------------------------------------------------------------------------------ME----------------------HRSMELYS-----------------------------------------------------------------------------------------------------------------------------------------------------------------------------------------------…
Arabidopsis thaliana	ATCopia8B#LTR/Copia 15-4285 Wised via estwise with ATCopia8A protein extended with ORF [Arabidopsis thaliana]	--------------------------------------------------------------------------------------------------------------------------------------------------------------------------------ME----------------------HRSMELYS-----------------------------------------------------------------------------------------------------------------------------------------------------------------------------------------------…
Arabidopsis	ATCopia79#LTR/Copia 23-4340 Wised via estwise with ATCopia47 protein [Arabidopsis]	--------------------------------------------------------------------------------------------------------------------------------------------------------------------------------MM----------------------DQSIQLYS-----------------------------------------------------------------------------------------------------------------------------------------------------------------------------------------------…
Arabidopsis	ATCopia55#LTR/Copia 14-4279 [Arabidopsis]	--------------------------------------------------------------------------------------------------------------------------------------------------------------------------------ME-----------------------------------------------------------------------------------------------------------------------------------------------------------------------------------------------------------------------------…
Arabidopsis thaliana	ATCopia7#LTR/Copia 34-4337 [Arabidopsis thaliana]	--------------------------------------------------------------------------------------------------------------------------------------------------------------------------------ME---------------------E------------------------SI----------------------------------------------------------------------------------------------------F------------------------------------------------------------------------…
Vitis vinifera	Copia-90_VVi#LTR/Copia 42-4603 [Vitis vinifera]	--------------------------------------------------------------------------------------------------------------------------------------------------------------------------------MA----------------------TPENVLSIQ----------------------------------------------------------------------------------------------------------------------------------------------------------------------------------------------…
Arabidopsis thaliana	ATCopia4#LTR/Copia 62-4486 [Arabidopsis thaliana]	M-------------------------------------------------------------------------------------------------------------------------------------------------------------------------------GS----------------------SANGLP-------------------------------------------------------------------------------------------------------------------------------------------------------------------------------------------------…
Arabidopsis thaliana	Castor#LTR/Copia 75-4454 [Arabidopsis thaliana]	--------------------------------------------------------------------------------------------------------------------------------------------------------------------------------MS----------------------QVNGLP-------------------------------------------------------------------------------------------------------------------------------------------------------------------------------------------------…
Brassica rapa	Copia-118_BRa#LTR/Copia 101-4294 [Brassica rapa]	--------------------------------------------------------------------------------------------------------------------------------------------------------------------------------MS----------------------LASPATSAET---------------------------------------------------------------------------------------------------------------------------------------------------------------------------------------------…
Brassica rapa	Copia-10_BRa#LTR/Copia 84-4474 [Brassica rapa]	--------------------------------------------------------------------------------------------------------------------------------------------------------------------------------MS----------------------SSTNNS-------------------------------------------------------------------------------------------------------------------------------------------------------------------------------------------------…
Populus trichocarpa	Copia8-PTR#LTR/Copia 38-4183 via tfasty with ATCopia21_2-4495, 2 frameshifts and 1 stopcodon. [Populus trichocarpa]	--------------------------------------------------------------------------------------------------------------------------------------------------------------------------------MS----------------------LSQNLT-------------------------------------------------------------------------------------------------------------------------------------------------------------------------------------------------…
Zea mays	Copia-42_ZM#LTR/Copia 78-4387 via tfasty with Copia-17_SB, 1 frameshift. [Zea mays]	--------------------------------------------------------------------------------------------------------------------------------------------------------------------------------MA----------------------SPVP---------------------------------------------------------------------------------------------------------------------------------------------------------------------------------------------------…
Zea mays	Copia-43_ZM#LTR/Copia 37-4383 via tfasty with Copia1_ZM, 1 stopcodon. [Zea mays]	--------------------------------------------------------------------------------------------------------------------------------------------------------------------------------MS----------------------SSPS---------------------------------------------------------------------------------------------------------------------------------------------------------------------------------------------------…
Sorghum bicolor	Copia-88_SB#LTR/Copia 162-4475 via tfasty with Copia1_ZM, 2 frameshifts. [Sorghum bicolor]	--------------------------------------------------------------------------------------------------------------------------------------------------------------------------------MA----------------------SSSSHHDAR----------------------------------------------------------------------------------------------------------------------------------------------------------------------------------------------…
Malus x domestica	Copia-5_Mad#LTR/Copia 113-4454 via tfasty with ATRE1, 2 frameshifts and 2 stopcodons. [Malus x domestica]	---------------------------------------------------------------------------------------------------------------------------------------------------------------------------------------------------------------------------------------------------------------------------------------------------------------------------------------------------------------------------------------------------------------…
Malus x domestica	Copia-70_Mad#LTR/Copia 365-4859 via tfasty with Copia-13_Mad, 4 frameshifts. [Malus x domestica]	--------------------------------------------------------------------------------------------------------------------------------------------------------------------------------MV----------------------TSAQLQ-------------------------------------------------------------------------------------------------------------------------------------------------------------------------------------------------…
Trigoniulus corallinus	Millipede_Gene.46::C17114775::g.46::m.46 type:complete len:112 gc:universal C17114775:852-517(-)	---------------------------------------------------------------------------------------------------------------------------------------------------------------------------------------------------------------------------------------------------------------------------------------------------------------------------------------------------------------------------------------------------------------…
Strigamia maritima	SMAR001164|m.48 SMAR001164|g.48 type:complete len:204 gc:universal SMAR001164:55-666(+)	---------------------------------------------------------------------------------------------------------------------------------------------------------------------------------------------------------------------------------------------------------------------------------------------------------------------------------------------------------------------------------------------------------------…
Strigamia maritima	JH430345.g5585.t1	---------------------------------------------------------------------------------------------------------------------------------------------------------------------------------------------------------------------------------------------------------------------------------------------------------------------------------------------------------------------------------------------------------------…
Strigamia maritima	JH430632.g2556.t1	---------------------------------------------------------------------------------------------------------------------------------------------------------------------------------------------------------------------------------------------------------------------------------------------------------------------------------------------------------------------------------------------------------------…
Strigamia maritima	SMAR001827|m.200 SMAR001827|g.200 type:complete len:390 gc:universal SMAR001827:12251-13420(+)	---------------------------------------------------------------------------------------------------------------------------------------------------------------------------------------------------------------------------------------------------------------------------------------------------------------------------------------------------------------------------------------------------------------…
Strigamia maritima	SMAR011247|m.837 SMAR011247|g.837 type:3prime_partial len:112 gc:universal SMAR011247:7541-7873(+)	---------------------------------------------------------------------------------------------------------------------------------------------------------------------------------------------------------------------------------------------------------------------------------------------------------------------------------------------------------------------------------------------------------------…
Strigamia maritima	AFFK01004946.g313.t1	---------------------------------------------------------------------------------------------------------------------------------------------------------------------------------------------------------------------------------------------------------------------------------------------------------------------------------------------------------------------------------------------------------------…
Strigamia maritima	JH430834.g1979.t1	---------------------------------------------------------------------------------------------------------------------------------------------------------------------------------------------------------------------------------------------------------------------------------------------------------------------------------------------------------------------------------------------------------------…
Strigamia maritima	JH430278.g1150.t1	---------------------------------------------------------------------------------------------------------------------------------------------------------------------------------------------------------------------------------------------------------------------------------------------------------------------------------------------------------------------------------------------------------------…
Strigamia maritima	SMAR001625|m.501 SMAR001625|g.501 type:complete len:258 gc:universal SMAR001625:9665-10438(+)	---------------------------------------------------------------------------------------------------------------------------------------------------------------------------------------------------------------------------------------------------------------------------------------------------------------------------------------------------------------------------------------------------------------…
Strigamia maritima	SMAR001164|m.51 SMAR001164|g.51 type:complete len:135 gc:universal SMAR001164:802-1206(+)	---------------------------------------------------------------------------------------------------------------------------------------------------------------------------------------------------------------------------------------------------------------------------------------------------------------------------------------------------------------------------------------------------------------…
Strigamia maritima	SMAR005011|m.586 SMAR005011|g.586 type:5prime_partial len:234 gc:universal SMAR005011:3-704(+)	---------------------------------------------------------------------------------------------------------------------------------------------------------------------------------------------------------------------------------------------------------------------------------------------------------------------------------------------------------------------------------------------------------------…
Malus x domestica	Copia-60_Mad_pol#LTR/Copia 2628-6278 via tfasty with COP2_MT, 2 frameshifts. [Malus x domestica]	---------------------------------------------------------------------------------------------------------------------------------------------------------------------------------------------------------------------------------------------------------------------------------------------------------------------------------------------------------------------------------------------------------------…
Daphnia pulex	Copia-1_DPu#LTR/Copia 218-4085 via tfasty with SHACOP8_MT, 2 frameshifts and 2 stopcodons. [Daphnia pulex]	---------------------------------------------------------------------------------------------------------------------------------------------------------------------------------------------------------------------------------------------------------------------------------------------------------------------------------------------------------------------------------------------------------------…
Daphnia pulex	Copia-22_DPu#LTR/Copia 335-4201 [Daphnia pulex]	---------------------------------------------------------------------------------------------------------------------------------------------------------------------------------------------------------------------------------------------------------------------------------------------------------------------------------------------------------------------------------------------------------------…
Daphnia pulex	Copia-4_DPu#LTR/Copia 40-4108 via tfasty with Copia-6_DPu, 64.5% SW:2530, 1 frameshift and 1 stopcodon. Copia-21_DPu over 80% similar with massive internal deletion. [Daphnia pulex]	M-------------------------------------------------------------------------------------------------------------------------------------------------------------------------------NS----------------------TLREVS-------------------------------------------------------------------------------------------------------------------------------------------------------------------------------------------------…
Daphnia pulex	Copia-19_DPu#LTR/Copia 40-4305 via tfasty with Copia-15_DPu, 69.3% SW:2792, 3 stopcodons. [Daphnia pulex]	--------------------------------------------------------------------------------------------------------------------------------------------------------------------------------MT----------------------TMRDVS-------------------------------------------------------------------------------------------------------------------------------------------------------------------------------------------------…
Daphnia pulex	Copia-32_DPu#LTR/Copia 42-4274 via tfasty with Copia-30_DPu, 70.2% SW:2775, 2 stopcodons. [Daphnia pulex]	------------------------------------------------------------------------------------------------------------------------------------------------------------------------------MTSP----------------------TLKDVG-------------------------------------------------------------------------------------------------------------------------------------------------------------------------------------------------…
Daphnia pulex	Copia-28_DPu#LTR/Copia 49-4456 via tfasty with Copia-25_DPu, 70.1% SW:3229, 1 frameshift and 7 stopcodons. [Daphnia pulex]	------------------------------------------------------------------------------------------------------------------------------------------------------------------------------MNCS----------------------GSRDVS-------------------------------------------------------------------------------------------------------------------------------------------------------------------------------------------------…
Daphnia pulex	Copia-13_DPu#LTR/Copia 60-4300 via tfasty with Copia16-NVi, 2 frameshifts and 2 stopcodons. [Daphnia pulex]	------------------------------------------------------------------------------------------------------------------------------------------------------------------------------MSMS----------------------TSKDIS-------------------------------------------------------------------------------------------------------------------------------------------------------------------------------------------------…
Daphnia pulex	Copia-25_DPu#LTR/Copia 61-4383 via tfasty with Copia-13_DPu, 2 frameshifts and 1 stopcodon. [Daphnia pulex]	--------------------------------------------------------------------------------------------------------------------------------------------------------------------------------MA----------------------CSNRSLS------------------------------------------------------------------------------------------------------------------------------------------------------------------------------------------------…
Daphnia pulex	Copia-38_DPu#LTR/Copia 71-4630 via tfasty with Copia-25_DPu, 77.5% SW:4116, 4 frameshifts and 6 stopcodons. [Daphnia pulex]	--------------------------------------------------------------------------------------------------------------------------------------------------------------------------------MS----------------------LSLA---------------------------------------------------------------------------------------------------------------------------------------------------------------------------------------------------…
Daphnia pulex	Copia-36_DPu#LTR/Copia 39-4273 via tfasty with Copia-13_DPu, 68.3% SW:2590, 4 frameshifts. [Daphnia pulex]	M-------------------------------------DGT------------------------------------------------------------------------------------------------------------------------------------FNPMF----------------------NPRDIS-------------------------------------------------------------------------------------------------------------------------------------------------------------------------------------------------…
Daphnia pulex	Copia-2_DPu#LTR/Copia 302-4318 via tfasty with Copia-1_DPu, 3 frameshifts and 2 stopcodons. [Daphnia pulex]	---------------------------------------------------------------------------------------------------------------------------------------------------------------------------------------------------------------------------------------------------------------------------------------------------------------------------------------------------------------------------------------------------------------…
Daphnia pulex	Copia-11_DPu#LTR/Copia 305-4267 via tfasty with TNT1, 2 frameshifts and 1 stopcodon. [Daphnia pulex]	M--------------------------------------------------------------------------------------------------------------------------------------------------------------------------------------------------------------------------------------------------------------------------------------------------------------------------------------------------------------------------------------------------------------…
Daphnia pulex	Copia-8_DPu#LTR/Copia 337-4248 [Daphnia pulex]	---------------------------------------------------------------------------------------------------------------------------------------------------------------------------------------------------------------------------------------------------------------------------------------------------------------------------------------------------------------------------------------------------------------…
Daphnia pulex	Copia-18_DPu#LTR/Copia 333-4286 via tfasty with Copia-8_DPu, 2 frameshifts and 2 stopcodons. [Daphnia pulex]	---------------------------------------------------------------------------------------------------------------------------------------------------------------------------------------------------------------------------------------------------------------------------------------------------------------------------------------------------------------------------------------------------------------…
Daphnia pulex	Copia-9_DPu#LTR/Copia 595-5059 via tfasty with Copia-5_DPu, 2 frameshifts and 1 stopcodon. [Daphnia pulex]	--------------------------------------------------------------------------------------------------------------------------------------------------------------------------------MA-----------------------------------------------------------------------------------------------------------------------------------------------------------------------------------------------------------------------------…
Daphnia pulex	Copia-16_DPu#LTR/Copia 574-4866 via tfasty with Copia-9_DPu, 2 stopcodons. First 60 AA or so appear to be between pos 100 and 250. [Daphnia pulex]	------------------------------------------------------------------------------------------------------------------------------------------------------------------------------LFLS-----------------------------------------------------------------------------------------------------------------------------------------------------------------------------------------------------------------------------…
Daphnia pulex	Copia-10_DPu#LTR/Copia 933-5326 via tfasty with TTO1_NT, 2 frameshifts and 9 stopcodons. [Daphnia pulex]	---------------------------------------------------------------------------------------------------------------------------------------------------------------------------------------------------------------------------------------------------------------------------------------------------------------------------------------------------------------------------------------------------------------…
Daphnia pulex	Copia-5_DPu#LTR/Copia 442-4657 via tfasty with TTO1_NT, 1 frameshift. [Daphnia pulex]	--------------------------------------------------------------------------------------------------------------------------------------------------------------------------------MS----------------------NQASMYNHI----------------------------------------------------------------------------------------------------------------------------------------------------------------------------------------------…
Daphnia pulex	Copia-14_DPu#LTR/Copia 437-4213 via tfasty with Copia-5_DPu, 2 frameshifts and 1 stopcodon. 115 AA internal deletion. [Daphnia pulex]	--------------------------------------------------------------------------------------------------------------------------------------------------------------------------------MP----------------------K------------------------------------------------------------------------------------------------------------------------------------------------------------------------------------------------------…
Daphnia pulex	Copia-33_DPu#LTR/Copia 499-4454 via tfasty with Copia-5_DPu, 78.8% SW:4175, 3 frameshifts and 2 stopcodons. [Daphnia pulex]	---------------------------------------------------------------------------------------------------------------------------------------------------------------------------------------------------------------------------------------------------------------------------------------------------------------------------------------------------------------------------------------------------------------…
Daphnia pulex	Copia-7_DPu#LTR/Copia 756-5180 via tfasty with Copia-5_DPu, 2 frameshifts and 5 stopcodons. [Daphnia pulex]	---------------------------------------------------------------------------------------------------------------------------------------------------------------------------------------------------------------------------------------------------------------------------------------------------------------------------------------------------------------------------------------------------------------…
Daphnia pulex	Copia-34_DPu#LTR/Copia 629-5187 via tfasty with Copia-7_DPu, 78.0% SW:4640, 2 frameshifts and 1 stopcodon. [Daphnia pulex]	--------------------------------------------------------------------------------------------------------------------------------------------------------------------------------MT-----------------------------------------------------------------------------------------------------------------------------------------------------------------------------------------------------------------------------…
Daphnia pulex	Copia-37_DPu#LTR/Copia 923-5448 via tfasty with Copia-7_DPu, 77.2% SW:4170, 4 frameshifts. [Daphnia pulex]	---------------------------------------------------------------------------------------------------------------------------------------------------------------------------------------------------------------------------------------------------------------------------------------------------------------------------------------------------------------------------------------------------------------…
Daphnia pulex	Copia-26_DPu#LTR/Copia 565-4475 via tfasty with Copia-19_DPu, 1 frameshift. [Daphnia pulex]	---------------------------------------------------------------------------------------------------------------------------------------------------------------------------------------------------------------------------------------------------------------------------------------------------------------------------------------------------------------------------------------------------------------…
Daphnia pulex	Copia-29_DPu#LTR/Copia 60-4941 via tfasty with Copia-30_DPu, 60.4% SW:2580, 2 frameshifts and 9 stopcodons. [Daphnia pulex]	------------------------------------------------------------------------------------------------------------------------------------------------------------------------------MAAY----------------------YSKDVS-------------------------------------------------------------------------------------------------------------------------------------------------------------------------------------------------…
Daphnia pulex	Copia-20_DPu#LTR/Copia 682-4873 via tfasty with Copia-19_DPu, 3 frameshifts and 6 stopcodons. [Daphnia pulex]	---------------------------------------------------------------------------------------------------------------------------------------------------------------------------------------------------------------------------------------------------------------------------------------------------------------------------------------------------------------------------------------------------------------…
Daphnia pulex	Copia-15_DPu#LTR/Copia 44-4435 via tfasty with Copia16-NVi, 3 frameshifts and 6 stopcodons. [Daphnia pulex]	--------------------------------------------------------------------------------------------------------------------------------------------------------------------------------MS----------------------NSKETA-------------------------------------------------------------------------------------------------------------------------------------------------------------------------------------------------…
Daphnia pulex	Copia-3_DPu#LTR/Copia 502-4953 via tfasty with Copia15-NVi, 1 frameshift and 4 stopcodons, plus a bad region from 2790-3400 removed (probably an insertion) [Daphnia pulex]	--------------------------------------------------------------------------------------------------------------------------------------------------------------------------------MQ----------------------VFAALQ-------------------------------------------------------------------------------------------------------------------------------------------------------------------------------------------------…
Daphnia pulex	Copia-17_DPu#LTR/Copia 42-4476 via tfasty with Copia-5_DPu, 2 frameshifts and 1 stopcodon. [Daphnia pulex]	--------------------------------------------------------------------------------------------------------------------------------------------------------------------------------MA----------------------ENSEGKR------------------------------------------------------------------------------------------------------------------------------------------------------------------------------------------------…
Glycine max	Copia-66_GM#LTR/Copia 1241-5287 [Glycine max]	--------------------------------------------------------------------------------------------------------------------------------------------------------------------------------MN----------------------ISC----------------------------------------------------------------------------------------------------------------------------------------------------------------------------------------------------…
Albugo laibachii	Copia-1_AL#LTR/Copia 5-4097 via tfasty with Copia-12_PR, 69.5% SW:2514, 3 frameshifts and 3 stopcodons. [Albugo laibachii]	--------------------------------------------------------------------------------------------------------------------------------------------------------------------------------MN----------------------PSSN---------------------------------------------------------------------------------------------------------------------------------------------------------------------------------------------------…
Phytophthora ramorum	Copia-2_PR#LTR/Copia 59-4143 via tfasty with Copia-12_PR, 86.4% SW:4742, 1 frameshift and 2 stopcodons. [Phytophthora ramorum]	--------------------------------------------------------------------------------------------------------------------------------------------------------------------------------MT----------------------TKRA---------------------------------------------------------------------------------------------------------------------------------------------------------------------------------------------------…
Phytophthora sojae	Copia-11_PSo#LTR/Copia 66-4145 via tfasty with Copia-12_PR, 85.6% SW:4594, 2 frameshifts and 5 stopcodons. [Phytophthora sojae]	--------------------------------------------------------------------------------------------------------------------------------------------------------------------------------MT----------------------TKRA---------------------------------------------------------------------------------------------------------------------------------------------------------------------------------------------------…
Phytophthora infestans	Copia-5_PIT#LTR/Copia 57-4116 via tfasty with Copia-12_PR, 85.1% SW:4397, 1 frameshift and 6 stopcodons. [Phytophthora infestans]	--------------------------------------------------------------------------------------------------------------------------------------------------------------------------------MT----------------------SKRA---------------------------------------------------------------------------------------------------------------------------------------------------------------------------------------------------…
Phytophthora ramorum	Copia-12_PR#LTR/Copia 45-4118 [Phytophthora ramorum]	--------------------------------------------------------------------------------------------------------------------------------------------------------------------------------MT----------------------TTSAKK-------------------------------------------------------------------------------------------------------------------------------------------------------------------------------------------------…
Phytophthora infestans	Copia-33_PIT#LTR/Copia 36-4239 via tfasty with Copia-12_PR, 73.3% SW:3116, 3 frameshifts. [Phytophthora infestans]	---------------------------------------------------------------------------------------------------------------------------------------------------------------------------------------------------------------------------------------------------------------------------------------------------------------------------------------------------------------------------------------------------------------…
Nasonia vitripennis	Copia4-NVi#LTR/Copia 245-4589 via tfasty with Copia4_AG_112-4080, 2 frameshifts and 7 stopcodons. [Nasonia vitripennis]	--------------------------------------------------------------------------------------------------------------------------------------------------------------------------------MA----------------------SRSSNGTY-----------------------------------------------------------------------------------------------------------------------------------------------------------------------------------------------…
Nasonia vitripennis	Copia10-NVi#LTR/Copia 144-4487 via tfasty with Copia4-NVi, 3 stopcodons. [Nasonia vitripennis]	--------------------------------------------------------------------------------------------------------------------------------------------------------------------------------MA----------------------SRNQISSF-----------------------------------------------------------------------------------------------------------------------------------------------------------------------------------------------…
Nasonia vitripennis	Copia7-NVi#LTR/Copia 122-4105 via tfasty with Copia4_AG_112-4080, 2 frameshifts. [Nasonia vitripennis]	--------------------------------------------------------------------------------------------------------------------------------------------------------------------------------MA----------------------SRTSSGVIL----------------------------------------------------------------------------------------------------------------------------------------------------------------------------------------------…
Nasonia vitripennis	Copia6-NVi#LTR/Copia 144-3560 via tfasty with Copia3_XT, 2 frameshifts. Coding region for C-terminal ~150 AA absent in consensus. [Nasonia vitripennis]	--------------------------------------------------------------------------------------------------------------------------------------------------------------------------------MI----------------------Q------------------------------------------------------------------------------------------------------------------------------------------------------------------------------------------------------…
Strigamia maritima	JH430219.g5993.t1	---------------------------------------------------------------------------------------------------------------------------------------------------------------------------------------------------------------------------------------------------------------------------------------------------------------------------------------------------------------------------------------------------------------…
Centruroides sculpturatus	Scorpion_Gene.523::hit_30::g.523::m.523 type:complete len:966 gc:universal hit_30:6877-9774(+)	--------------------------------------------------------------------------------------------------------------------------------------------------------------------------------MA----------------------NSQTMSEANM---------------------------------------------------------------------------------------------------------------------------------------------------------------------------------------------…
Strigamia maritima	JH429574.g1566.t1	--------------------------------------------------------------------------------------------------------------------------------------------------------------------------------MS----------------------E------------------------------------------------------------------------------------------------------------------------------------------------------------------------------------------------------…
Hordeum vulgare	Copia3_HV_gagpol#LTR/Copia 55-5962 via tfasty with PREM2_ZM, 4 frameshifts and 7 stopcodons. [Hordeum vulgare]	M-------------------------------------DGTAIT----IAPVESDGTSTEVRSFTSEDL--------------------------------------------------------------------------------------------------------ERALA----------------------KQKEEHDDSLEALVQ------------------------IRLASLTTGTT-----------------------------------------------------------------------------------------------------------------------------------------------------…
Hordeum vulgare	INGA_HV_pol#LTR/Copia 2550-6041 [Hordeum vulgare]	---------------------------------------------------------------------------------------------------------------------------------------------------------------------------------------------------------------------------------------------------------------------------------------------------------------------------------------------------------------------------------------------------------------…
Zea mays	PREM2_ZM_pol#LTR/Copia 2759-6001 [Zea mays]	---------------------------------------------------------------------------------------------------------------------------------------------------------------------------------------------------------------------------------------------------------------------------------------------------------------------------------------------------------------------------------------------------------------…
Stegodyphus mimosarum	Smal_Gene.30103::hit_1151::g.30103::m.30103 type:complete len:1174 gc:universal hit_1151:4952-8473(+)	--------------------------------------------------------------------------------------------------------------------------------------------------------------------------------MS-----------------------------------------------------------------------------------------------------------------------------------------------------------------------------------------------------------------------------…
Centruroides sculpturatus	Scorpion_Gene.691::hit_41::g.691::m.691 type:5prime_partial len:784 gc:universal hit_41:2-2353(+)	---------------------------------------------------------------------------------------------------------------------------------------------------------------------------------------------------------------------------------------------------------------------------------------------------------------------------------------------------------------------------------------------------------------…
Centruroides sculpturatus	Scorpion_Gene.1033::hit_58::g.1033::m.1033 type:complete len:696 gc:universal hit_58:6962-9049(+)	---------------------------------------------------------------------------------------------------------------------------------------------------------------------------------------------------------------------------------------------------------------------------------------------------------------------------------------------------------------------------------------------------------------…
Stegodyphus mimosarum	Smal_Gene.10074::hit_368::g.10074::m.10074 type:complete len:1324 gc:universal hit_368:6770-10741(+)	--------------------------------------------------------------------------------------------------------------------------------------------------------------------------------ME----------------------K------------------------------------------------------------------------------W-----------------------------------------------------------------------------------------------------------------------…
Nasonia vitripennis	Copia12-NVi#LTR/Copia 4161-7436 via tfasty with Copia1_XT, 1 stopcodon. Copia12-NVi appears to be an odd tandem duplicate (second coding region 8333-end continued by 1-3250.) [Nasonia vitripennis]	---------------------------------------------------------------------------------------------------------------------------------------------------------------------------------------------------------------------------------------------------------------------------------------------------------------------------------------------------------------------------------------------------------------…
Stegodyphus mimosarum	Smal_Gene.33213::hit_1274::g.33213::m.33213 type:complete len:1308 gc:universal hit_1274:6680-10603(+)	--------------------------------------------------------------------------------------------------------------------------------------------------------------------------------MA----------------------CARSSD--------------------------------------------------------------------------------------------------------------------------I----------------------------------------------------------------------…
Nasonia vitripennis	Copia-22_NVi#LTR/Copia 341-4149 via tfasty with Copia-105_AA, 1 frameshift and 1 stopcodon. [Nasonia vitripennis]	---------------------------------------------------------------------------------------------------------------------------------------------------------------------------------------------------------------------------------------------------------------------------------------------------------------------------------------------------------------------------------------------------------------…
Drosophila ananassae	Copia-1_DAn#LTR/Copia 453-3635 64.3% sim to Copia12-NVi, SW:2434, [Drosophila ananassae]	-----------------------------------------------------MQGVAIKIEKDIDE----------------------------------------------------------------------------------------------KNTEIKKAI----TMAA----------------------QARIED-------------------------------------------------------------------------------------------------------------------------------------------------------------------------------------------------…
Daphnia pulex	Copia-12_DPu#LTR/Copia 41-4215 via tfasty with Copia-8_DPu, 1 frameshift and 1 stopcodon. [Daphnia pulex]	--------------------------------------------------------------------------------------------------------------------------------------------------------------------------------MA----------------------SSTEEK-------------------------------------------------------------------------------------------------------------------------------------------------------------------------------------------------…
Laccaria bicolor	Copia-2_LBS#LTR/Copia 188-4563 [Laccaria bicolor]	--------------------------------------------------------------------------------------------------------------------------------------------------------------------------------MS----------------------TSSS---------------------------------------------------------------------------------------------------------------------------------------------------------------------------------------------------…
Aiptasia spp	Aipt_AIPGENE25023	--------------------------------------------------------------------------------------------------------------------------------------------------------------------------------MN-----------------------------------------------------------------------------------------------------------------------------------------------------------------------------------------------------------------------------…
Tuber melanosporum	Copia-2_TMe#LTR/Copia 80-4457 via tfasty with Copia-2_PPa, 62.2% SW:1813, 1 frameshift and 2 stopcodons. [Tuber melanosporum]	--------------------------------------------------------------------------------------------------------------------------------------------------------------------------------MS----------------------EDSSNNAYT----------------------------------------------------------------------------------------------------------------------------------------------------------------------------------------------…
Tuber melanosporum	Copia-7_TMe#LTR/Copia 81-4436 61.3% sim to Copia-7_SMo, SW:1587, [Tuber melanosporum]	--------------------------------------------------------------------------------------------------------------------------------------------------------------------------------MS----------------------TSDRTSKL----------------------------------------------------------------------------------------------------------------------FP-----------------------------------------------------------------------…
Tremella mesenterica	Copia-5_Trm#LTR/Copia 76-5132 via tfasty with Copia-1_Trm, 1 frameshift. Misses C-term perhaps. [Tremella mesenterica]	--------------------------------------------------------------------------------------------------------------------------------------------------------------------------------MP----------------------PKQETF-------------------------------------------------------------------------------------------------------------------------------------------------------------------------------------------------…
Strigamia maritima	JH429905.g3741.t1	---------------------------------------------------------------------------------------------------------------------------------------------------------------------------------------------------------------------------------------------------------------------------------------------------------------------------------------------------------------------------------------------------------------…
Nasonia vitripennis	Copia8-NVi#LTR/Copia 670-5899 via tfasty with SHACOP_MT, 3 frameshifts and 2 stopcodons. [Nasonia vitripennis]	-----------------------------------MLINS-------------TGVDQEEFRRIILR------EWARLEANEAY-----GDKYHRDTVTLLRKKDGSSYFLRSELQLRRFDEVLSET-----ERAVIDRVWPAVKKQLVFQLRYSVDSITR----SEFMW----MMLE----------------------QNKMFLTG----------------------------------IEMLVKGLTMPGFGQQLP-------------------YFDQSPPAKPLSVEPRGPEPPKSTVTVQPKKPAALVEETEPVEPRNAF--LDIRKKPRIKGIENFPKAASTPF------------------------GRPQT-V-------RCTELIDMS…
Nasonia vitripennis	Copia13-NVi#LTR/Copia 2104-6990 [Nasonia vitripennis]	M----------------NQN------------------------FERFTT--KISGDVQQL-------------------------------------------------------------------------------------------------------------------MR----------------------SVDSLKLRGQD-------------------------------GQAVKDWQEKPTLSANN-----------------------------------------------KPSI-VSCTRPAEPIK------L-----HPRGRG-RGFRPANRNPL------------------T--LLAPGPR-------------ELGPAE…
Nasonia vitripennis	Copia17-NVi#LTR/Copia 1914-7455 via tfasty with Copia8-NVi (plus improvement), 4 frameshifts and 1 stopcodon. [Nasonia vitripennis]	MLICA----ILGQF--LSEDDCQFLRKIWPPGEKVMLVSEPRIS-ERMVTEERLKAAMQEIEKTVETKVKTTLEWITEQQKEFF---DMQAKLNKELIESTLSKMTEGIQKQKEIEAPKQDKVENDTKV---------RSW---------------------------------LRWA----------------------TTKTTPGTKAAPKIK---------NIE-----DV-DI-ELKIRQGVKEYEERNRLGADLR---------------------------------------------LKPTIDESLLEEENFVVP-----I---------------------------------------------RRPGPRK-----------RELGE--…
Nasonia vitripennis	Copia21-NVi#LTR/Copia 3-2702 C-terminal fragment via tfasty with Copia13-NVi, 1 stopcodon. [Nasonia vitripennis]	---------------------------------------------------------------------------------------------------------------------------------------------------------------------------------------------------------------------------------------------------------------------------------------------------------------------------------------------------------------------------------------------------------------…
Nasonia vitripennis	Copia-23_NVi#LTR/Copia 1421-6796 [Nasonia vitripennis]	-----------------------------------MFLDNSLIE-ERL-----LESVKKEIKRIRAEEV-APAEKVDPSQR--------GNTLSPKLDVNTVTADGGPAYKFDEGKEQKSDFVDNDSWKNKFEANMLGKSTPVIKSNQLIQLGLGLNNFRHDXRTSKLGQ----FSLN----------------------NTDKNLEI----------------------------------SEITAKLDKLEKENTD-----------------------------------------------LKKTIETECNRVHDDVV----------------------------------------------------------------------TELLR--…
Drosophila kikkawai	Copia-2_DKi#LTR/Copia 129-3668 via tfasty with Copia-1_DYa, 65.2% SW:1997, 4 frameshifts and 2 stopcodons. [Drosophila kikkawai]	--------------------------------------------------------------------------------------------------------------------------------------------------------------------------------MN----------------------PSMNS--------------------------------------------------------------------------------------------------------------------------------------------------------------------------------------------------…
Centruroides sculpturatus	Scorpion_Gene.762::hit_44::g.762::m.762 type:complete len:1007 gc:universal hit_44:6937-9957(+)	--------------------------------------------------------------------------------------------------------------------------------------------------------------------------------MS----------------------NTVR---------------------------------------------------------------------------------------------------------------------------------------------------------------------------------------------------…
Laccaria bicolor	Copia-4_LBS#LTR/Copia 70-4917 67.9% sim to Copia-9_LBS, SW:2866, [Laccaria bicolor]	--------------------------------------------------------------------------------------------------------------------------------------------------------------------------------MT----------------------VGESSSSD----------------------------------PVSTPASSRPISLLSPLP--------------------------------------------------------------------------------------------------------------------NTPL-------------------…
Centruroides sculpturatus	Scorpion_Gene.941::hit_53::g.941::m.941 type:complete len:704 gc:universal hit_53:6904-9015(+)	--------------------------------------------------------------------------------------------------------------------------------------------------------------------------------MT----------------------EAV----------------------------------------------------------------------------------------------------------------------------------------------------------------------------------------------------…
Ectocarpus siliculosus	Copia-9_ES#LTR/Copia 224-5085 via tfasty with Copia-106_AA, 57.4% SW:1199, 1 frameshift and 1 stopcodon. [Ectocarpus siliculosus]	--------------------------------------------------------------------------------------------------------------------------------------------------------------------------------MA----------------------ESTGKLT------------------------------------------------------------------------------------------------------------------------------------------------------------------------------------------------…
Ustilago maydis	Copia-1_UM#LTR/Copia 772-4439 via tfasty with Copia16-PTR, 2 frameshifts and 2 stopcodons. [Ustilago maydis]	--------------------------------------------------------------------------------------------------------------------------------------------------------------------------------MN-----------------------------------------------------------------------------------------------------------------------------------------------------------------------------------------------------------------------------…
Trigoniulus corallinus	Millipede_Gene.22::scaffold148254::g.22::m.22 type:complete len:95 gc:universal scaffold148254:381-97(-)	---------------------------------------------------------------------------------------------------------------------------------------------------------------------------------------------------------------------------------------------------------------------------------------------------------------------------------------------------------------------------------------------------------------…
Strigamia maritima	AFFK01018575.g1464.t1	---------------------------------------------------------------------------------------------------------------------------------------------------------------------------------------------------------------------------------------------------------------------------------------------------------------------------------------------------------------------------------------------------------------…
Strigamia maritima	AFFK01013360.g1871.t1	---------------------------------------------------------------------------------------------------------------------------------------------------------------------------------------------------------------------------------------------------------------------------------------------------------------------------------------------------------------------------------------------------------------…
Strigamia maritima	AFFK01018816.g2815.t1	--------------------------------------------------------------------------------------------------------------------------------------------------------------------------------MY----------------------YDAQSVD------------------------------------------------------------------------------------------------------------------------------------------------------------------------------------------------…
Salpingoeca rosetta	Sros_PTSG_13044	--------------------------------------------------------------------------------------------------------------------------------------------------------------------------------MQ----------------------TSSSSP-------------------------------------------------------------------------------------------------------------------------------------------------------------------------------------------------…
Strigamia maritima	AFFK01018323.g5385.t1	---------------------------------------------------------------------------------------------------------------------------------------------------------------------------------------------------------------------------------------------------------------------------------------------------------------------------------------------------------------------------------------------------------------…
Strigamia maritima	AFFK01009056.g201.t1	---------------------------------------------------------------------------------------------------------------------------------------------------------------------------------------------------------------------------------------------------------------------------------------------------------------------------------------------------------------------------------------------------------------…
Strigamia maritima	AFFK01007313.g291.t1	---------------------------------------------------------------------------------------------------------------------------------------------------------------------------------------------------------------------------------------------------------------------------------------------------------------------------------------------------------------------------------------------------------------…
OUTGROUP	ACCORD2_pol_LTR_Gypsy	---------------------------------------------------------------------------------------------------------------------------------------------------------------------------------------------------------------------------------------------------------------------------------------------------------------------------------------------------------------------------------------------------------------…
OUTGROUP	AFLAV_pol_LTR_Gypsy	--------------------------------------------------------------------------------------------------------------------------------------------------------------------------------ME----------------------KRDNEAWRKGSHR--------------------------PKGQYKSNDQRERTGVKHNDP-------------------Y-----------------------------------------------------------------------------------------------GPKPMEL-----------------…
OUTGROUP	ATGP1_pol_LTR_Gypsy	---------------------------------------------------------------------------------------------------------------------------------------------------------------------------------------------------------------------------------------------------------------------------------------------------------------------------------------------------------------------------------------------------------------…
OUTGROUP	DIRS1_pol	---------------------------------------------------------------------------------------------------------------------------------------------------------------------------------------------------------------------------------------------------------------------------------------------------------------------------------------------------------------------------------------------------------------…
OUTGROUP	DIRS-2_SP_pol	--------------------------------------------------------------------------------------------------------------------------------------------------------------------------------QA-----------------------------------------------------------------------------------------------------F----------------------------------------------F------------------------------------------------------------------------…
OUTGROUP	DIRS-1_ACas_pol	--------------------------------------------------------------------------------------------------------------------------------------------------------------------------------MQ----------------------E------------------------------------------------------------------------------------------------------------------------------------------------------------------------------------------------------…
OUTGROUP	DIRS-25_NV_pol	--------------------------------------------------------------------------------------------------------------------------------------------------------------------------------LRL----------------------------------------------------------------------------------------------------F-----------------------------------------------------------------------------------------------------------------------…
OUTGROUP	DrNGARO1_pol	---------------------------------------------------------------------------------------------------------------------------------------------------------------------------------------------------------------------------------------------------------------------------------------------------------------------------------------------------------------------------------------------------------------…
OUTGROUP	BEL-1_CQ_LTR_Pao	--------------------------------------------------------------------------------------------------------------------------------------------------------------------------------MA----------------------PRKSLLGP-----------------------------------------------------------------------------------------------------------------------------------------------------------------------------------------------…
OUTGROUP	MAX_LTR_Pao	M---------------------------------------------------PLEGDKKKT-----------------------PAPGKEQKFNPQSPISTR---------------------------------------------------------------GRPAP----KSVS----------------------PRVKTATPT-----------------------------------------------------------------------------------------------------------------------------------------------------------------------PKPKVL-----------------…

## Sheet: S3_MBD_alignment
	Supplemental Table S3: Multi-sequence alignment of the MBD domain from CopiaMBD and other MBD containing proteins
Species	Sequence_ID	Aligned_sequence
Centruroides sculpturatus	Cscu_CSCU013617-PA	ENPLWIPILTGWERQIAKHRAGNR---RIVFYQGPCGRRLRNIVEVHRYLMETKSK-LMVDLFCFDSYVNTS
Centruroides sculpturatus	Cscu_CSCU019674-PA	KNPLQIPILCGWERQVTKHRAGCR---RVVFYVTPCRRRLRSIKEVNHYLWKTKSK-LTIDLFCFDSCVHTF
Daphnia pulex	Dpul_EFX64878	LNPLSIPMLCGWSREVAKQRHGER---LSIIYRAPCGRRMRNMDEVHRYLRLTGSQ-LGVDLFCFDNFVHCF
Daphnia pulex	Dpul_EFX65681	VNPLSIPLRCGWSREFAAQRKTART--VIVFYRAPCGRRMRNMDELHRYLRITKSE-LGVDLFCFDSRVNCF
Crassostrea gigas	Cgig_10026622	TNPLLIPLLCGWERHVCKIKPAYK---RAVLYRAPCARRLRSMEEVELFLALTDSN-LPIDLFCFDPQLHVH
Strigamia maritima	Smar_006378_SETDB	SNPLMIPMLCGWERQITKYQTSGK---RVLFYRSPCGRRLRDMKEVRIYLEVTSCS-FPVDLFCFNVQVHCY
Capitella teleta	Ctel_224568	SNPLLVPQLCGWQRQCCRQKNYGK---RAVIYVAPCSKRLRCLNDVSRYLSLTDSK-LSIDLFCFDSGLHTD
Homo sapiens	Hsap_SETDB1_Q15047	KNPLLVPLLYDFRRMTARRRVNRKMG-FHVIYKTPCGLCLRTMQEIERYLFETGCDFLFLEMFCLDPYVLVD
Tribolium castaneum	Tcas_TC006043	HNPLSKPLLCGWARMTLKVK--GR---KEIVYKAPCSQILRNMKEVHQYLRVTKSE-MTVDLFDFNHMVRCL
Drosophila melanogaster	Dmel_FBgn0086908	YSPLAKPLLSGWERLVMRQKTK-----KSVVYKGPCGKSLRSLAEVHRYLRATENV-LNVDNFDFTPDLKCL
Nematostella vectensis	Nvec_NVE7875	HNFLSIPLLCNWKREFSRRHPKGR---KEVYYRAPCNRRLKSIAEVGQYLTTTCTRNVTIDQFSFDPEISCS
Homo sapiens	Hsap_SETDB2_Q96T68	ENPLQLPIKCHFQRRHAKTNSHSSA--LHVSYKTPCGRSLRNVEEVFRYLLETECNFLFTDNFSFNTYVQLA
Centruroides sculpturatus	Cscu_CSCU019089-PA	ILVEASSLPNGWSRKVVQRRTGKTAGRYDVYIFNPNGKRFRSRTELSTYLKRSKSN-LKAEEFDFNPQKKSD
Daphnia pulex	Dpul_EFX70089	PLFDDPSLPTGWHRKVVQRQTGATAGQWDVYVYNPEGKKFRSRNELRTHFNQIGST-MNSEDFDFSVKGKG-
Strigamia maritima	Smar_014354_MECP2	PMVEDPRLPEGWSRKVVQRQTGKSAGKFDVYIYSPDGKKFRSRFELANYIVKNNLS-LDIKQFDFSVRGKAK
Homo sapiens	Hsap_MeCP2_P51608	PMYDDPTLPEGWTRKLKQRKSGRSAGKYDVYLINPQGKAFRSKVELIAYFEKVGDTSLDPNDFDFTVTGRGS
Crassostrea gigas	Cgig_10023379	PMLLDKQLPKGWTRKVVQRLSGKSAGKYDVYIYSPSGRKLRSKTDLARYLEEEGITELTADDFDFTVRGKHQ
Capitella teleta	Ctel_102897	PLREDVTLPPGWTRKVTQRQMGKSAGKYDVYIFSPSGKKFRSRTDLASWVEKNDISDVNPYEIDFSVRGVNN
Centruroides sculpturatus	Cscu_CSCU028007-PA	PLLEDPSLPDGWTRKVVQRRTGKSAGKYDVYIFR--------------------------------------
Stegodyphus mimosarum	Smal_KFM63941	SVEDQHNLPKGWVRKTVVRKSGKTAGQVDVYIYSPEGIKFRSKPDIAAYLARTKSP-LKLDDFSFSKKLSDS
Nematostella vectensis	Nvec_NVE10389	MDHHPRDLPKGWKKVCVTRKSGKTKGHVDVYIHDPLGRKFRSLAELKRHLIEADLG-LSIEQFSFRADGANF
Homo sapiens	Hsap_MBD4_O95243	GTECRKSVPCGWERVVKQRLFGKTAGRFDVYFISPQGLKFRSKSSLANYLHKNGETSLKPEDFDFTVLSKRG
Tribolium castaneum	Tcas_TC003775	TKYECAALPKRWQREDMLRKTGISVGKVDVMYYSRGVR----------------------------------
Stegodyphus mimosarum	Smal_KFM74257	SATDCPALPKGWKREEIIRKNGLSSGKIDVFYYSPSGKRFRSKPQLARFLGDA----VDLSTFDYRTGKINS
Strigamia maritima	Smar_015035_MBD_1_2_3	NTLDCPALPKGWKREEIIRKSGLSAGKIDVFYYSPSGKKFRSKPQLARYLGES----VDLSTFDFRTGKINS
Crassostrea gigas	Cgig_10011651	RRLDCVGLPPGWKREEVVRKSGLSAGKTDVYYISPDGKKIRSKPQLARQLGEQ----FDLSAFDFRSGRINH
Daphnia pulex	Dpul_EFX83334	KRFECNALPKGWTREEVIRKAGLSAGTKDIFYYSPNGKKFRSKPQLVRYLGDT----VDLTTFDYKTGKINA
Homo sapiens	Hsap_MBD2_Q9UBB5	KRMDCPALPPGWKKEEVIRKSGLSAGKSDVYYFSPSGKKFRSKPQLARYLGNT----VDLSSFDFRTGKMMP
Homo sapiens	Hsap_MBD3_O95983	KRWECPALPQGWEREEVPRRSGLSAGHRDVFYYSPSGKKFRSKPQLARYLGGS----MDLSTFDFRTGKMLM
Drosophila melanogaster	Dmel_FBgn0027950	KRVDCSVLPKGWQRDEV-RKSGSSANKVDVFYYSPTGKRAEGKPQ-------------DIAIPDFQPGKMPH
Capitella teleta	Ctel_180602	RRLDIPGLPPGWRREENVRKSGLSAGKTDVYYISPDGTRVRSKPQLCRMVGDA----VDLNSFDFRTGKILQ
Nematostella vectensis	Nvec_NVE9319	VRVTCPSLPKGWLREIVLRKSGVSAGRSDVYYYSPDGKKCRSKPQLEKELG-G----VDLTDFDFRSGTFCR
[truncated: 41 more rows]

## Sheet: S4_Phylogenies
	Supplemental Table S4: Maximum likelihood phylogenetic trees obtained with IQ-TREE
[truncated: 3 more rows]

## Sheet: S5_Strigamia_LTR.bed
	Supplemental Table S5: Strigamia maritima LTR-retrotransposon annotation
[truncated: 365 more rows]

[truncated: 3 more sheets: S6_Smimosarum_LTR.bed, S7_Sdumicola_LTR.bed, S8_CopiaMBD_sequences]
